# Supplementary material for: Visible-light promoted one-pot synthesis of sulfonated spiro[4,5]trienones from propiolamides, anilines and sulfur dioxide under transition metal-free conditions
Source: Royal Society of Chemistry journal article supplement (doi:10.1039/c9cc05949k), 2019-01-01

## Supporting Information

# Visible-light-promoted one-pot synthesis of sulfonated spiro[4,5]trienones from propiolamides, anilines and sulfur dioxide under transition-metal-free conditions

Yu Liu,\* Qiao-Lin Wang, Zan Chen, Quan-Zhou,\* Bi-Quan Xiong, Pan-Liang Zhang, and Ke-Wen Tang\*

Department of Chemistry and Chemical Engineering, Hunan Institute of Science and Technology, Yueyang 414006, P. R. China

Fax: (+86)-730-8640-122; phone: (+86)-730-8640-122

Email: lyxtmj\_613@163.com and email: tangkewen@sina.com

### List of Contents

|                                                                                               |                |
|-----------------------------------------------------------------------------------------------|----------------|
| <b>1. General Information</b>                                                                 | <b>S1</b>      |
| <b>2. Experimental Section</b>                                                                | <b>S1</b>      |
| <b>2.1 General procedure for the synthesis of propioamides (1):</b>                           | <b>S1</b>      |
| <b>2.2 Typical Experimental Procedure for the Synthesis of Sulfonated Spiro[4,5]trienones</b> | <b>S1-S2</b>   |
| <b>2.3 Table S1: Screening the optimal conditions</b>                                         | <b>S2-S3</b>   |
| <b>2.4 The O<sup>18</sup>-Labelled Control Experiment</b>                                     | <b>S3-S4</b>   |
| <b>3. Analytical data</b>                                                                     | <b>S5-S16</b>  |
| <b>4. Reference</b>                                                                           | <b>S17</b>     |
| <b>5. <sup>1</sup>H and <sup>13</sup>C spectra</b>                                            | <b>S18-S64</b> |

## 1. General Information

All reactions were carried out with magnetic stirring and in dried glassware. Standard syringe techniques were applied for transfer of dry solvents. All reagents and solvents were commercially available and used without any further purification unless specified. Proton ( $^1\text{H}$  NMR) and carbon ( $^{13}\text{C}$  NMR) nuclear magnetic resonance spectra were recorded at 400 MHz and 100MHz, respectively. The chemical shifts are given in parts per million (ppm) on the delta ( $\delta$ ) scale. The solvent peak was used as a reference value, for  $^1\text{H}$  NMR: TMS = 0.00 ppm, for  $^{13}\text{C}$  NMR:  $\text{CDCl}_3$  = 77.00 ppm. The following abbreviations were used to explain multiplicities: s = singlet, d = doublet, dd = doublet of doublet, t = triplet, td = triplet of doublet, q = quartet, m = multiplet, and br = broad. Analytical TLC was performed on precoated silica gel plates. High-resolution mass spectra (HRMS) were obtained on an Agilent mass spectrometer using ESI-TOF (electrospray ionization-time of flight).

## 2. Experiment Section

### 2.1 General procedure for the synthesis of alkynoates (1):

All propioamides (**1**) were synthesized according to the known methods.<sup>1-3</sup>

### 2.2 Typical Experimental Procedure for the Synthesis of Sulfonated Spiro[4,5]trienones

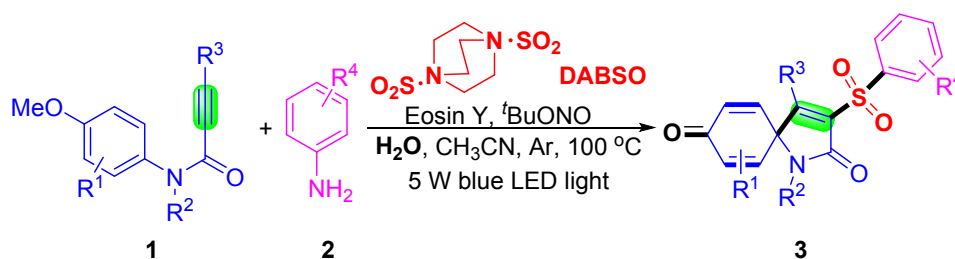

To a Schlenk tube were added **1** (0.2 mmol), **2** (0.4 mmol, 2 equiv), DABSO (0.3 mmol, 1.5 equiv), Eosin Y (10 mol%),  $t\text{BuONO}$  (0.4 mmol, 2 equiv),  $\text{H}_2\text{O}$  (0.8 mmol, 4 equiv),  $\text{CH}_3\text{CN}$  (2 mL). Then the mixture was stirred at  $70\text{ }^\circ\text{C}$  (oil bath temperature) in argon atmosphere (1 atm) under 5 W blue LED light for 24 h until complete consumption of starting material as monitored by TLC and GC-MS analysis. After the reaction was finished, the reaction mixture was washed with brine. The aqueous phase was re-extracted with EtOAc ( $3 \times 10\text{ mL}$ ). The combined organic extracts were dried

over Na<sub>2</sub>SO<sub>4</sub> and concentrated in vacuum. The residue was purified by silica gel flash column chromatography (hexane/ethyl acetate = 2 : 1 to 1 : 2) to afford the desired products **3**.

### 2.3 Table S1: Screening the optimal conditions

To identify the best reaction conditions, we began to investigate the sulfonylation/*ipso*-cyclization of *N*-(*p*-methoxyaryl)propiolamide (**1a**, 0.2 mmol) with 4-methoxyaniline (**2a**, 2 equiv) in the presence of DABSO (1.5 equiv), Eosin Y (10 mol%), <sup>t</sup>BuONO (2 equiv) and H<sub>2</sub>O (4 equiv) at 70 °C in acetonitrile (2 mL) irradiation with a 5 W blue LED light source for 24 h (Table S1). To our surprise, the product **3aa** could be obtained in 89% yield (entry 1). Conducting the reaction without Eosin Y and additional light could also give the target product in 45% yield (entry 2). The reaction yield increased when the reaction was irradiated by a 5 W blue LED light under no Eosin Y conditions (entry 3). These results suggested that light only promoted the sulfonylation/*ipso*-cyclization reaction. Two other photocatalysts, including Ru(bpy)<sub>3</sub>Cl<sub>2</sub> and Ir(ppy)<sub>3</sub>, were investigated (entries 4-5). The results indicated that they were inferior to Eosin Y. Using 3 W blue LED light, 12 W blue LED light or 36 W compact fluorescent light instead of 5 W blue LED light could not deliver higher reaction yields (entries 6-8). Subsequently, several kinds of other solvents, including DMF, DMSO, DCE, and THF, were tested. None of them afforded higher yields than that of CH<sub>3</sub>CN (entries 9-12). Next, the amount of H<sub>2</sub>O was investigated and the addition of 4 equiv of H<sub>2</sub>O to the reaction afforded the highest reaction yields (entries 13-14). Decreasing the temperature to 50 °C or increasing the temperature to 90 °C did not give satisfactory reaction yields (entries 15-16). A longer reaction time (36 h) furnished the desired product in a similar yield (entry 17). However, 1 gram (3.77 mmol) of substrate **1a** could also construct the 3-sulfonyl-spiro[4,5]decatrienone **3aa** in good yield (entry 18).

Table S1. Screening of optimal reaction conditions<sup>a</sup>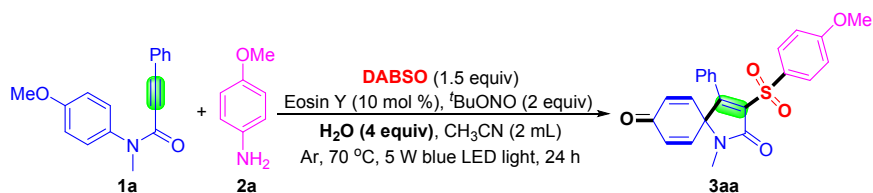

| entry           | variation from the standard conditions                       | yield (%) <sup>b</sup> |
|-----------------|--------------------------------------------------------------|------------------------|
| 1               | none                                                         | 89                     |
| 2 <sup>c</sup>  | without Eosin Y and additional light                         | 45                     |
| 3               | without Eosin Y                                              | 64                     |
| 4               | Ru(bpy) <sub>3</sub> Cl <sub>2</sub> instead of Eosin Y      | 76                     |
| 5               | Ir(ppy) <sub>3</sub> (5 mol %) instead of Eosin Y            | 70                     |
| 6               | 3 W blue LED light instead of 5 W blue LED light             | 75                     |
| 7               | 12 W blue LED light instead of 5 W blue LED light            | 84                     |
| 8               | 36 W compact fluorescent light instead of 5 W blue LED light | 78                     |
| 9 <sup>c</sup>  | DMF instead of CH <sub>3</sub> CN                            | 40                     |
| 10 <sup>c</sup> | DMSO instead of CH <sub>3</sub> CN                           | 34                     |
| 11              | DCE instead of CH <sub>3</sub> CN                            | 65                     |
| 12              | THF instead of CH <sub>3</sub> CN                            | 71                     |
| 13 <sup>c</sup> | 6 equiv of H <sub>2</sub> O                                  | 83                     |
| 14              | 2 equiv of H <sub>2</sub> O                                  | 74                     |
| 15 <sup>c</sup> | at 50 °C                                                     | 57                     |
| 16              | at 90 °C                                                     | 77                     |
| 17              | for 36 h                                                     | 87                     |
| 18 <sup>d</sup> | none                                                         | 73                     |

<sup>a</sup> Reaction conditions: **1a** (0.2 mmol), **2a** (0.4 mmol, 2 equiv), DABSO (0.3 mmol, 1.5 equiv), Eosin Y (10 mol %), TBN (0.4 mmol, 2 equiv), H<sub>2</sub>O (4 equiv), CH<sub>3</sub>CN (2 mL), at 70 °C under an argon atmosphere and 5 W blue LED irradiation for 24 h. <sup>b</sup> Isolated yield. <sup>c</sup> The rest of substrate **1a** was recovered. <sup>d</sup> **1a** (1.0 g, 3.77 mmol) and CH<sub>3</sub>CN (20 mL) for 60 h.

## 2.4 The O<sup>18</sup>-Labelled Control Experiment

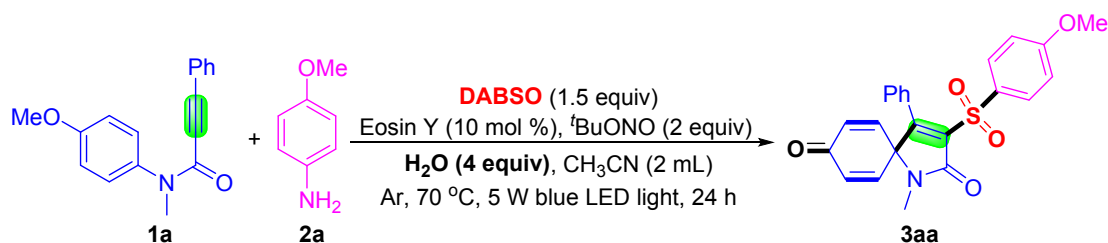

3-((4-methoxyphenyl)sulfonyl)-1-methyl-4-phenyl-1-azaspiro[4.5]deca-3,6,9-triene-2,8-dione (**3aa**)  
 Chemical Formula: C<sub>23</sub>H<sub>19</sub>NO<sub>5</sub>S  
 Exact Mass: 421.0984  
 Molecular Weight: 421.4670

zqs1 #215-275 RT: 2.31-2.91 AV: 61 NL: 6.98E7  
T: + p Q1MS [120.00-550.00]

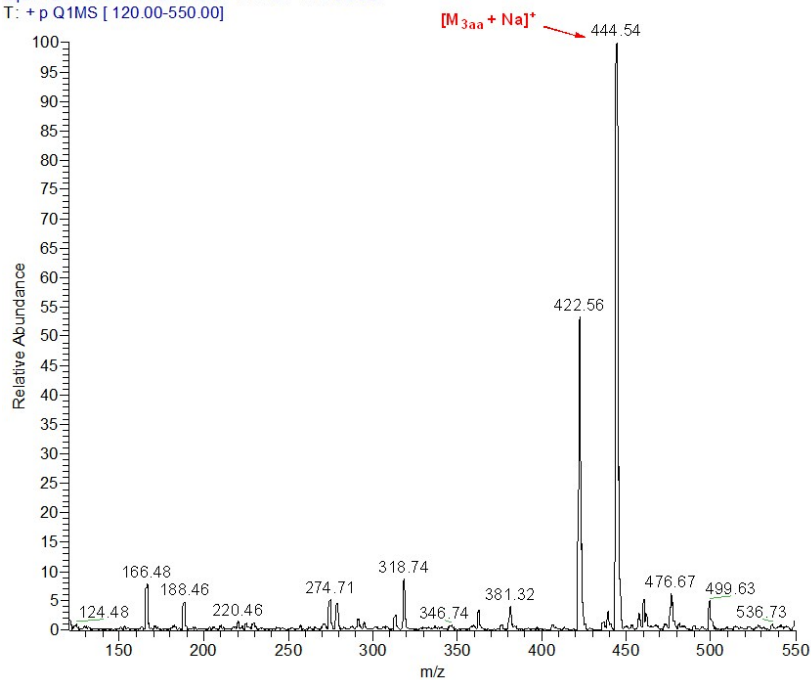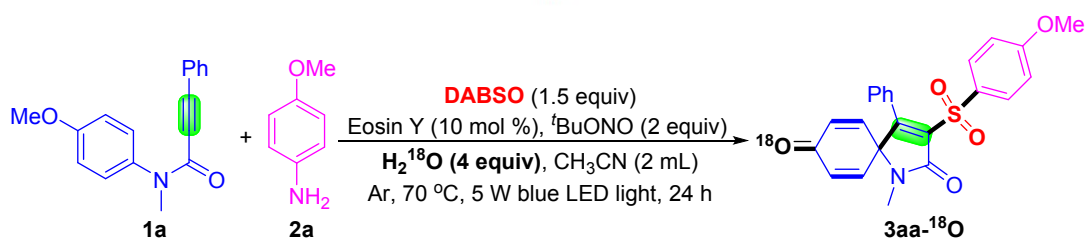

3-((4-methoxyphenyl)sulfonyl)-1-methyl-4-phenyl-1-azaspiro[4.5]deca-3,6,9-triene-2,8-dione-<sup>18</sup>O (**3aa-<sup>18</sup>O**)

Chemical Formula: C<sub>23</sub>H<sub>19</sub>NO<sub>4</sub><sup>18</sup>OS

Exact Mass: 423.1026

Molecular Weight: 423.4672

zqs2 #227-253 RT: 2.71-2.97 AV: 27 NL: 4.36E7  
T: + p Q1MS [120.00-550.00]

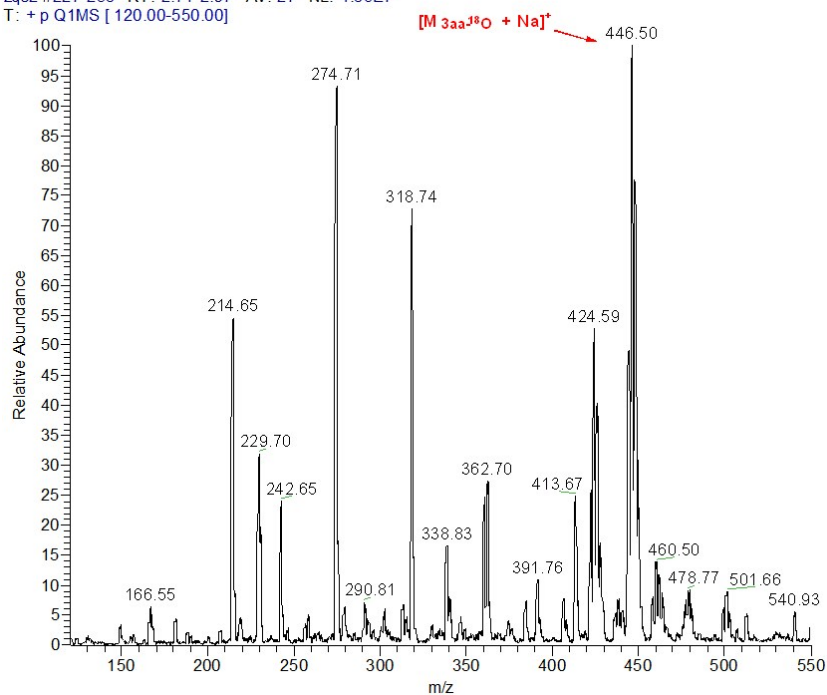

### 3. Analytical data

#### 3-((4-Methoxyphenyl)sulfonyl)-1-methyl-4-phenyl-1-azaspiro[4.5]deca-3,6,9-triene-2,8-dione

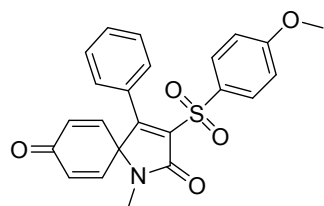

**(3aa):** yield: 75.0 mg, 89%; yellow solid; mp 216-218 °C (uncorrected); <sup>1</sup>H NMR (400 MHz, CDCl<sub>3</sub>) δ: 7.97 (d, *J* = 8.8 Hz, 2H), 7.45-7.41 (m, 1H), 7.39-7.35 (m, 2H), 7.15-7.13 (m, 2H), 6.99 (d, *J* = 8.8 Hz, 2H), 6.47-6.41 (m, 4H), 3.87 (s, 3H), 2.83 (s, 3H); <sup>13</sup>C NMR (100 MHz, CDCl<sub>3</sub>) δ: 183.1, 164.3, 163.6, 160.9, 142.3 (2C), 136.9, 134.2 (2C), 131.5, 130.3, 130.2, 128.6, 127.9, 127.7, 114.2, 68.1, 55.7, 26.3; HRMS (ESI-TOF) *m/z*: C<sub>23</sub>H<sub>20</sub>NO<sub>5</sub>S (M + H)<sup>+</sup> calcd for 422.1057, found 422.1062.

#### 1-Benzyl-3-((4-methoxyphenyl)sulfonyl)-4-phenyl-1-azaspiro[4.5]deca-3,6,9-triene-2,8-dione

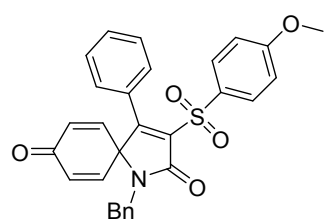

**(3ba):** yield: 82.5 mg, 83%; red solid; mp 224-225 °C (uncorrected); <sup>1</sup>H NMR (400 MHz, CDCl<sub>3</sub>) δ: 7.99 (d, *J* = 9.2 Hz, 2H), 7.40 (t, *J* = 7.6 Hz, 1H), 7.32 (t, *J* = 7.6 Hz, 2H), 7.27-7.24 (m, 3H), 7.18-7.16 (m, 2H), 7.06-7.00 (m, 4H), 6.26-6.18 (m, 4H), 4.48 (s, 2H), 3.90 (s, 3H); <sup>13</sup>C NMR (100 MHz, CDCl<sub>3</sub>) δ: 183.3, 164.3, 163.8, 161.2, 142.6 (2C), 136.9, 136.4, 133.3 (2C), 131.5, 130.4, 130.1, 129.0, 128.6, 128.3, 128.1, 127.8, 127.8, 114.3, 68.4, 55.7, 45.1; HRMS (ESI-TOF) *m/z*: C<sub>29</sub>H<sub>24</sub>NO<sub>5</sub>S (M + H)<sup>+</sup> calcd for 498.1370, found 498.1375.

#### 1-(2-Iodobenzyl)-3-((4-methoxyphenyl)sulfonyl)-4-phenyl-1-azaspiro[4.5]deca-3,6,9-triene-2,8-dione (3ca)

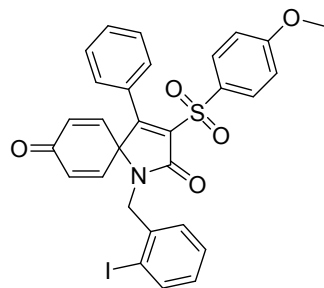

**dione (3ca):** yield: 94.7 mg, 76%; red solid; mp 203-204 °C (uncorrected); <sup>1</sup>H NMR (400 MHz, CDCl<sub>3</sub>) δ: 8.00-7.97 (m, 2H), 7.74-7.71 (m, 1H), 7.38 (d, *J* = 7.6 Hz, 1H), 7.34-7.29 (m, 3H), 7.25-7.24 (m, 1H), 7.09-7.06 (m, 2H), 7.02-7.00 (m, 2H), 6.94-6.93 (m, 1H), 6.25-6.16 (m, 4H), 4.63 (s, 2H), 3.89 (s, 3H); <sup>13</sup>C NMR (100 MHz, CDCl<sub>3</sub>) δ: 183.3, 164.3, 163.8, 161.5, 141.7 (2C), 139.5, 138.7, 136.6, 133.6 (2C), 131.5, 130.4, 130.3, 130.1, 129.8, 128.7, 128.3, 127.8, 127.7, 114.3, 99.5, 68.3, 55.7, 49.2; HRMS (ESI-TOF) *m/z*: C<sub>29</sub>H<sub>23</sub><sup>127</sup>INO<sub>5</sub>S (M + H)<sup>+</sup> calcd for 624.0336, found 624.0342.

#### 1-Acetyl-3-((4-methoxyphenyl)sulfonyl)-4-phenyl-1-azaspiro[4.5]deca-3,6,9-triene-2,8-dione (3ea)

**(3ea):** yield: 62.0 mg, 69%; red solid; mp 143-144 °C (uncorrected); <sup>1</sup>H NMR (400 MHz, CDCl<sub>3</sub>) δ: 7.88 (d, *J* = 8.8 Hz, 2H), 7.44-7.41 (m, 1H), 7.37-7.33 (m, 2H), 7.03-6.98 (m, 4H), 6.50 (d, *J* = 10.0 Hz, 2H),

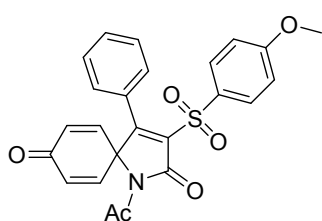

6.22 (d,  $J = 10.0$  Hz, 2H), 3.88 (s, 3H), 2.56 (s, 3H);  $^{13}\text{C}$  NMR (100 MHz,  $\text{CDCl}_3$ )  $\delta$ : 183.1, 168.6, 164.5, 163.9, 162.5, 141.7 (2C), 136.5, 133.0 (2C), 131.4, 130.2, 129.9, 128.0, 127.5, 126.9, 114.4, 67.9, 55.7, 25.6; HRMS (ESI-TOF)  $m/z$ :  $\text{C}_{24}\text{H}_{20}\text{NO}_6\text{S}$  ( $\text{M} + \text{H}$ ) $^+$  calcd for 450.1006, found 450.1011.

**3-((4-Methoxyphenyl)sulfonyl)-1,6-dimethyl-4-phenyl-1-azaspiro[4.5]deca-3,6,9-triene-2,8-dione**

**(3fa)**: yield: 64.4 mg, 74%; red solid; mp 194-195 °C (uncorrected);  $^1\text{H}$  NMR (400 MHz,  $\text{CDCl}_3$ )  $\delta$ : 7.96 (d,  $J = 9.2$  Hz, 2H), 7.44-7.42 (m, 1H), 7.37 (t,  $J = 7.6$  Hz, 2H), 7.17-7.14 (m, 2H), 6.99 (d,  $J = 8.8$  Hz, 2H), 6.45-6.37 (m, 2H), 6.31-6.30 (m, 1H), 3.88 (s, 3H), 2.74 (s, 3H),

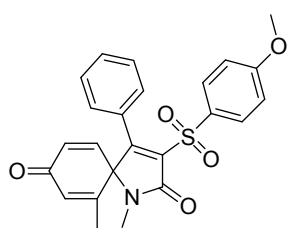

1.73 (s, 3H);  $^{13}\text{C}$  NMR (100 MHz,  $\text{CDCl}_3$ )  $\delta$ : 183.8, 164.2, 164.1, 161.1, 150.7, 142.4, 137.4, 133.8, 132.8, 131.4, 130.5, 130.4, 128.3, 128.0, 127.7, 114.2, 70.4, 55.6, 25.9, 17.6; HRMS (ESI-TOF)  $m/z$ :  $\text{C}_{24}\text{H}_{22}\text{NO}_5\text{S}$  ( $\text{M} + \text{H}$ ) $^+$  calcd for 436.1213, found 436.1219.

**6-Chloro-3-((4-methoxyphenyl)sulfonyl)-1-methyl-4-phenyl-1-azaspiro[4.5]deca-3,6,9-triene-2,8-dione**

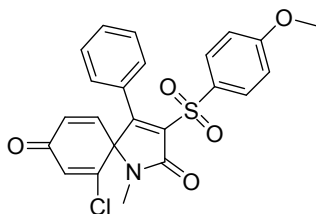

**(3ga)**: yield: 63.7 mg, 70%; red solid; mp 190-191 °C (uncorrected);  $^1\text{H}$  NMR (400 MHz,  $\text{CDCl}_3$ )  $\delta$ : 7.97-7.94 (m, 2H), 7.44-7.37 (m, 3H), 7.13-7.11 (m, 2H), 7.03-6.98 (m, 2H), 6.69-6.68 (m, 1H), 6.51-6.50 (m, 2H), 3.88 (s, 3H), 2.86 (s, 3H);  $^{13}\text{C}$  NMR (100 MHz,  $\text{CDCl}_3$ )  $\delta$ : 176.3, 164.3, 163.3, 159.9, 143.1, 138.2, 137.5, 137.2, 133.1, 131.5, 130.3, 130.1, 128.1, 128.0, 127.7, 114.3, 69.8, 55.7, 26.5; HRMS (ESI-TOF)  $m/z$ :  $\text{C}_{23}\text{H}_{19}^{35}\text{ClNO}_5\text{S}$  ( $\text{M} + \text{H}$ ) $^+$  calcd for 456.0667, found 456.0672.

**6-Iodo-3-((4-methoxyphenyl)sulfonyl)-1-methyl-4-phenyl-1-azaspiro[4.5]deca-3,6,9-triene-2,8-dione**

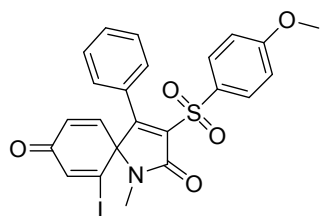

**(3ha)**: yield: 68.9 mg, 63%; red oil;  $^1\text{H}$  NMR (400 MHz,  $\text{CDCl}_3$ )  $\delta$ : 7.96 (d,  $J = 9.2$  Hz, 2H), 7.44-7.37 (m, 3H), 7.25-7.24 (m, 1H), 7.12-7.09 (m, 2H), 6.01-6.99 (m, 2H), 6.53-6.49 (m, 2H), 3.88 (s, 3H), 2.87 (s, 3H);  $^{13}\text{C}$  NMR (100 MHz,  $\text{CDCl}_3$ )  $\delta$ : 177.1, 164.4, 163.4, 159.5, 150.1, 143.1, 137.1, 131.6, 131.0, 130.3, 130.1, 128.1, 128.0, 127.7, 114.3, 109.3, 71.3, 55.7, 26.6; HRMS (ESI-TOF)  $m/z$ :  $\text{C}_{23}\text{H}_{19}^{127}\text{INO}_5\text{S}$  ( $\text{M} + \text{H}$ ) $^+$  calcd for 548.0023, found 548.0029.

**7-Methoxy-3-((4-methoxyphenyl)sulfonyl)-1-methyl-4-phenyl-1-azaspiro[4.5]deca-3,6,9-triene-2,8-dione**

**(3ia)**: yield: 67.7 mg, 75%; red solid; mp 257-258 °C (uncorrected);  $^1\text{H}$  NMR (400 MHz,

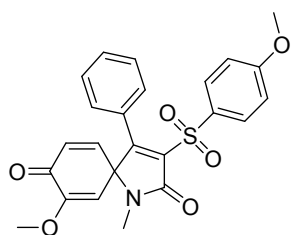

CDCl<sub>3</sub>)  $\delta$ : 8.00-7.97 (m, 2H), 7.42-7.40 (m, 1H), 7.38-7.34 (m, 2H), 7.13-7.11 (m, 2H), 7.01-6.99 (m, 2H), 6.47-6.41 (m, 2H), 5.30 (s, 1H), 3.88 (s, 3H), 3.66 (s, 3H), 2.82 (s, 3H); <sup>13</sup>C NMR (100 MHz, CDCl<sub>3</sub>)  $\delta$ : 178.7, 164.2, 163.3, 162.0, 154.4, 143.0, 136.3, 133.6, 131.6, 130.4, 130.1, 128.7, 127.8, 127.6, 114.2, 108.6, 69.6, 55.7, 55.6, 26.1; HRMS (ESI-TOF) *m/z*: C<sub>24</sub>H<sub>22</sub>NO<sub>6</sub>S (M + H)<sup>+</sup> calcd for 452.1162, found 452.1168.

**7-Chloro-3-((4-methoxyphenyl)sulfonyl)-1-methyl-4-phenyl-1-azaspiro[4.5]deca-3,6,9-triene-2,8-**

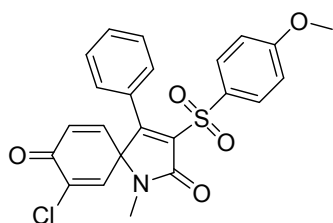

**dione (3ja):** yield: 65.5 mg, 72%; red oil; <sup>1</sup>H NMR (400 MHz, CDCl<sub>3</sub>)  $\delta$ : 7.95 (d, *J* = 8.8 Hz, 2H), 7.44-7.36 (m, 3H), 7.13-7.11 (m, 2H), 6.99 (d, *J* = 9.2 Hz, 2H), 6.69 (s, 1H), 6.51-6.48 (m, 2H), 3.87 (s, 3H), 2.86 (s, 3H); <sup>13</sup>C NMR (100 MHz, CDCl<sub>3</sub>)  $\delta$ : 176.3, 164.3, 163.3, 159.9, 143.1, 138.2, 137.4, 137.2, 133.1, 131.5, 130.3, 130.1, 128.1, 128.0, 127.7, 114.3, 69.8, 55.7, 26.5; HRMS (ESI-TOF) *m/z*: C<sub>23</sub>H<sub>19</sub><sup>35</sup>ClNO<sub>5</sub>S (M + H)<sup>+</sup> calcd for 456.0667, found 456.0672.

**4-(2-Ethylphenyl)-3-((4-methoxyphenyl)sulfonyl)-1-methyl-1-azaspiro[4.5]deca-3,6,9-triene-2,8-**

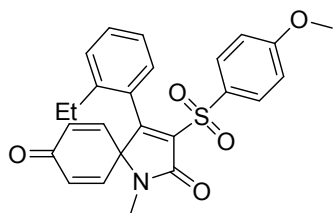

**dione (3ka):** yield: 53.9 mg, 60%; red solid; mp 230-231 °C (uncorrected); <sup>1</sup>H NMR (400 MHz, CDCl<sub>3</sub>)  $\delta$ : 7.94-7.92 (m, 2H), 7.36-7.34 (m, 2H), 7.15-7.13 (m, 1H), 6.99-6.97 (m, 2H), 6.76 (d, *J* = 7.6 Hz, 1H), 6.53-6.50 (m, 1H), 6.45-6.44 (m, 2H), 6.34 (d, *J* = 10.0 Hz, 1H), 3.87 (s, 3H), 2.85 (s, 3H), 2.72-2.62 (m, 1H), 2.45-2.36 (m, 1H), 1.28 (t, *J* = 7.4 Hz, 3H); <sup>13</sup>C NMR (100 MHz, CDCl<sub>3</sub>)  $\delta$ : 183.0, 164.3, 163.5, 161.0, 142.6, 142.5, 141.7, 138.0, 134.3, 133.7, 131.5, 130.2, 129.9, 127.8, 127.1, 127.0, 124.5, 114.1, 69.2, 55.6, 26.5, 26.3, 14.3; HRMS (ESI-TOF) *m/z*: C<sub>25</sub>H<sub>24</sub>NO<sub>5</sub>S (M + H)<sup>+</sup> calcd for 450.1370, found 450.1375.

**3-((4-Methoxyphenyl)sulfonyl)-1-methyl-4-(*o*-tolyl)-1-azaspiro[4.5]deca-3,6,9-triene-2,8-dione**

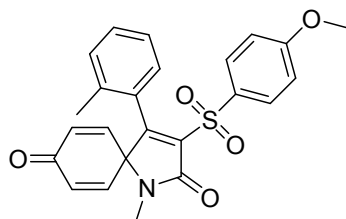

**(3la):** yield: 58.3 mg, 67%; red solid; mp 240-241 °C (uncorrected); <sup>1</sup>H NMR (400 MHz, CDCl<sub>3</sub>)  $\delta$ : 7.94 (d, *J* = 8.8 Hz, 2H), 7.29-7.27 (m, 1H), 7.22 (t, *J* = 7.2 Hz, 1H), 7.15 (t, *J* = 6.8 Hz, 1H), 6.99-6.97 (m, 2H), 6.79 (d, *J* = 7.6 Hz, 1H), 6.52-6.51 (m, 1H), 6.47-6.46 (m, 2H), 6.35-6.32 (m, 1H), 3.87 (s, 3H), 2.86 (s, 3H), 2.27 (s, 3H); <sup>13</sup>C NMR (100 MHz, CDCl<sub>3</sub>)  $\delta$ : 183.0, 164.3, 163.5, 160.7, 142.4, 142.2, 135.9, 134.4, 133.7, 131.6, 130.3, 130.2, 129.7, 127.6, 127.2, 124.6,



114.2, 69.4, 55.6, 26.5, 20.8; HRMS (ESI-TOF)  $m/z$ : C<sub>24</sub>H<sub>22</sub>NO<sub>5</sub>S (M + H)<sup>+</sup> calcd for 436.1213, found 436.1219.

**3-((4-Methoxyphenyl)sulfonyl)-1-methyl-4-(*m*-tolyl)-1-azaspiro[4.5]deca-3,6,9-triene-2,8-dione**

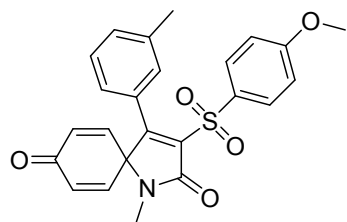

**(3ma):** yield: 60.9 mg, 70%; yellow solid; mp 115-116 °C (uncorrected); <sup>1</sup>H NMR (400 MHz, CDCl<sub>3</sub>) δ: 7.96 (d,  $J$  = 8.8 Hz, 2H), 7.28-7.21 (m, 2H), 6.99 (d,  $J$  = 8.8 Hz, 2H), 6.94-6.91 (m, 2H), 6.44 (s, 4H), 3.87 (s, 3H), 2.82 (s, 3H), 2.34 (s, 3H); <sup>13</sup>C NMR (100

MHz, CDCl<sub>3</sub>) δ: 183.2, 164.2, 163.7, 161.1, 142.4 (2C), 137.5, 136.7, 134.1 (2C), 131.5, 131.0, 130.4, 128.5, 128.3, 127.7, 124.7, 114.2, 68.1, 55.6, 26.2, 21.3; HRMS (ESI-TOF)  $m/z$ : C<sub>24</sub>H<sub>22</sub>NO<sub>5</sub>S (M + H)<sup>+</sup> calcd for 436.1213, found 436.1219.

**4-(3,5-Dimethylphenyl)-3-((4-methoxyphenyl)sulfonyl)-1-methyl-1-azaspiro[4.5]deca-3,6,9-triene-2,8-dione (3na):**

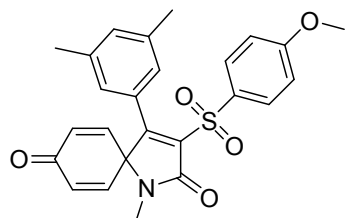

**(3na):** yield: 74.6 mg, 83%; red solid; mp 206-207 °C (uncorrected); <sup>1</sup>H NMR (400 MHz, CDCl<sub>3</sub>) δ: 7.95 (d,  $J$  = 9.2 Hz, 2H), 7.02 (s, 1H), 6.98 (d,  $J$  = 8.8 Hz, 2H), 6.70 (s, 2H), 6.43 (s, 4H), 3.87 (s, 3H), 2.82 (s, 3H), 2.29 (s, 6H); <sup>13</sup>C NMR (100 MHz, CDCl<sub>3</sub>)

δ: 183.2, 164.1, 163.7, 161.3, 142.5 (2C), 137.3, 136.5, 133.9 (2C), 131.9, 131.4, 130.5, 128.4, 125.3, 114.1, 68.0, 55.6, 26.2, 21.2; HRMS (ESI-TOF)  $m/z$ : C<sub>25</sub>H<sub>24</sub>NO<sub>5</sub>S (M + H)<sup>+</sup> calcd for 450.1370, found 450.1375.

**3-((4-Methoxyphenyl)sulfonyl)-1-methyl-4-(*p*-tolyl)-1-azaspiro[4.5]deca-3,6,9-triene-2,8-dione**

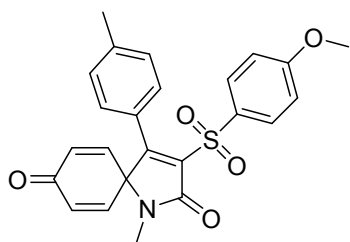

**(3oa):** yield: 74.8 mg, 86%; red solid; mp 198-199 °C (uncorrected); <sup>1</sup>H NMR (400 MHz, CDCl<sub>3</sub>) δ: 7.97 (d,  $J$  = 8.8 Hz, 2H), 7.16 (d,  $J$  = 8.0 Hz, 2H), 7.06 (d,  $J$  = 8.4 Hz, 2H), 6.99 (m, 2H), 6.45-6.44 (m, 4H), 3.87 (s, 3H), 2.82 (s, 3H), 2.36 (s, 3H); <sup>13</sup>C NMR (100 MHz, CDCl<sub>3</sub>) δ: 183.2, 164.2, 163.7, 161.2, 142.5 (2C),

140.5, 136.5, 134.1 (2C), 131.5, 130.4, 128.6, 127.7, 125.6, 114.2, 68.1, 55.6, 26.2, 21.4; HRMS (ESI-TOF)  $m/z$ : C<sub>24</sub>H<sub>22</sub>NO<sub>5</sub>S (M + H)<sup>+</sup> calcd for 436.1213, found 436.1219.

**4-(4-(*tert*-Butyl)phenyl)-3-((4-methoxyphenyl)sulfonyl)-1-methyl-1-azaspiro[4.5]deca-3,6,9-triene-2,8-dione (3pa):**

yield: 84.0 mg, 88%; red solid; mp 215-216 °C (uncorrected); <sup>1</sup>H NMR (400 MHz, CDCl<sub>3</sub>) δ: 7.96 (d,  $J$  = 8.8 Hz, 2H), 7.35 (d,  $J$  = 8.0 Hz, 2H), 7.12 (d,  $J$  = 8.0 Hz, 2H), 6.98 (d,  $J$  = 8.8 Hz, 2H), 6.48-6.42 (m, 4H), 3.86 (s, 3H), 2.80 (s, 3H), 1.31 (s, 9H); <sup>13</sup>C NMR (100 MHz, CDCl<sub>3</sub>) δ:

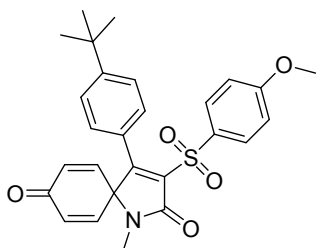

183.3, 164.1, 163.7, 161.1, 153.4, 142.5 (2C), 136.3, 134.0 (2C), 131.4, 130.4, 127.6, 125.6, 124.7, 114.1, 67.9, 55.6, 34.7, 31.0, 26.1; HRMS (ESI-TOF)  $m/z$ :  $C_{27}H_{28}NO_5S$  ( $M + H$ )<sup>+</sup> calcd for 478.1683, found 478.1688.

**4-(4-Methoxyphenyl)-3-((4-methoxyphenyl)sulfonyl)-1-methyl-1-azaspiro[4.5]deca-3,6,9-triene-**

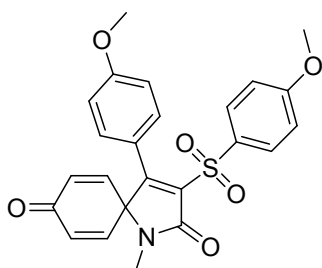

**2,8-dione (3qa):** yield: 76.7 mg, 85%; yellow solid; mp 218-219 °C (uncorrected); <sup>1</sup>H NMR (400 MHz, CDCl<sub>3</sub>) δ: 7.98 (d,  $J = 8.8$  Hz, 2H), 7.18 (d,  $J = 8.8$  Hz, 2H), 6.99 (d,  $J = 9.2$  Hz, 2H), 6.87 (d,  $J = 8.8$  Hz, 2H), 6.48-6.42 (m, 4H), 3.87 (s, 3H), 3.81 (s, 3H), 2.80 (s, 3H); <sup>13</sup>C NMR (100 MHz, CDCl<sub>3</sub>) δ: 183.2, 164.1, 163.8, 161.1, 160.8, 142.7

(2C), 135.9, 134.0 (2C), 131.5, 130.4, 129.6, 120.6, 114.1, 113.4, 68.0, 55.6, 55.2, 26.1; HRMS (ESI-TOF)  $m/z$ :  $C_{24}H_{22}NO_6S$  ( $M + H$ )<sup>+</sup> calcd for 452.1162, found 452.1168.

**4-(4-Fluorophenyl)-3-((4-methoxyphenyl)sulfonyl)-1-methyl-1-azaspiro[4.5]deca-3,6,9-triene-2,8-**

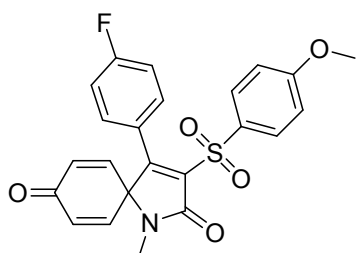

**dione (3ra):** yield: 68.5 mg, 78%; red solid; mp 94-95 °C (uncorrected); <sup>1</sup>H NMR (400 MHz, CDCl<sub>3</sub>) δ: 7.97 (d,  $J = 9.2$  Hz, 2H), 7.20-7.17 (m, 2H), 7.08 (t,  $J = 7.6$  Hz, 2H), 7.06-7.00 (m, 2H), 6.49-6.43 (m, 4H), 3.89 (s, 3H), 2.84 (s, 3H); <sup>13</sup>C NMR (100 MHz, CDCl<sub>3</sub>) δ: 183.0, 164.4, 163.6 (d,  $J = 250.1$  Hz, 1C), 163.4, 159.7,

142.2 (2C), 137.4, 134.3 (2C), 131.6, 130.1, 130.0, 124.5 (d,  $J = 3.6$  Hz, 1C), 115.3 (d,  $J = 2.2$  Hz, 1C), 114.3, 68.1, 55.7, 26.3; <sup>19</sup>F NMR (282 MHz, CDCl<sub>3</sub>) δ: -109.2 (s, 1F); HRMS (ESI-TOF)  $m/z$ :  $C_{23}H_{19}^{19}FNO_5S$  ( $M + H$ )<sup>+</sup> calcd for 440.0962, found 440.0968.

**4-(4-Chlorophenyl)-3-((4-methoxyphenyl)sulfonyl)-1-methyl-1-azaspiro[4.5]deca-3,6,9-triene-2,8-**

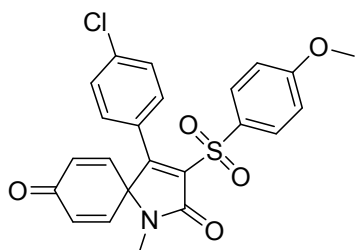

**dione (3sa):** yield: 72.8 mg, 80%; red solid; mp 120-121 °C (uncorrected); <sup>1</sup>H NMR (400 MHz, CDCl<sub>3</sub>) δ: 7.95 (d,  $J = 9.2$  Hz, 2H), 7.34 (d,  $J = 8.8$  Hz, 2H), 7.10 (d,  $J = 8.8$  Hz, 2H), 7.00 (d,  $J = 9.2$  Hz, 2H), 6.45 (s, 4H), 3.88 (s, 3H), 2.83 (s, 3H); <sup>13</sup>C NMR (100 MHz, CDCl<sub>3</sub>) δ: 182.9, 164.4, 163.3, 159.3, 142.1 (2C), 137.4,

136.5, 134.3 (2C), 131.5, 130.0, 129.2, 128.3, 126.9, 114.3, 68.0, 55.6, 26.3; HRMS (ESI-TOF)  $m/z$ :  $C_{23}H_{19}^{35}ClNO_5S$  ( $M + H$ )<sup>+</sup> calcd for 456.0667, found 456.0672.

**3-((4-Methoxyphenyl)sulfonyl)-1-methyl-4-(4-(trifluoromethyl)phenyl)-1-azaspiro[4.5]deca-3,6,9-**

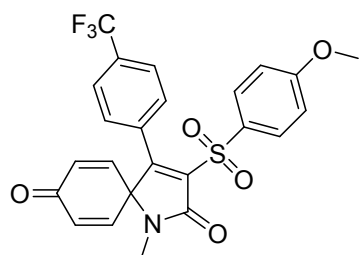

**triene-2,8-dione (3ta):** yield: 72.4 mg, 74%; yellow solid; mp 185-186 °C (uncorrected); <sup>1</sup>H NMR (400 MHz, CDCl<sub>3</sub>) δ: 7.95 (d, *J* = 8.8 Hz, 2H), 7.63 (d, *J* = 8.0 Hz, 2H), 7.29-7.27 (m, 2H), 7.00 (d, *J* = 9.2 Hz, 2H), 6.51-6.44 (m, 4H), 3.88 (s, 3H), 2.85 (s, 3H); <sup>13</sup>C NMR (100 MHz, CDCl<sub>3</sub>) δ: 182.7, 164.5, 163.2, 158.7, 141.8 (2C),

138.1, 134.5, 132.3 (2C), 132.0 (q, *J* = 32.8 Hz, 1C), 131.6, 129.8, 128.4, 124.9 (q, *J* = 3.7 Hz, 1C), 123.5 (q, *J* = 271.0 Hz, 1C), 114.4, 68.0, 55.7, 26.4; <sup>19</sup>F NMR (282 MHz, CDCl<sub>3</sub>) δ: -62.9 (s, 3F); HRMS (ESI-TOF) *m/z*: C<sub>24</sub>H<sub>19</sub><sup>19</sup>F<sub>3</sub>NO<sub>5</sub>S (M + H)<sup>+</sup> calcd for 490.0931, found 490.0936.

**4-(4-Acetylphenyl)-3-((4-methoxyphenyl)sulfonyl)-1-methyl-1-azaspiro[4.5]deca-3,6,9-triene-2,8-**

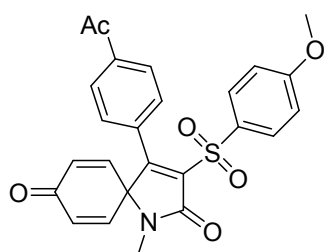

**dione (3ua):** yield: 69.5 mg, 75%; white solid; mp 239-240 °C (uncorrected); <sup>1</sup>H NMR (400 MHz, CDCl<sub>3</sub>) δ: 7.99-7.96 (m, 4H), 7.27-7.24 (m, 2H), 7.03-7.01 (m, 2H), 6.45 (s, 4H), 3.89 (s, 3H), 2.85 (s, 3H), 2.62 (s, 3H); <sup>13</sup>C NMR (100 MHz, CDCl<sub>3</sub>) δ: 197.0, 182.8, 164.6, 163.3, 159.4, 141.9 (2C), 138.0, 137.9, 134.5 (2C), 133.3,

131.7, 129.9, 128.2, 127.8, 114.4, 68.0, 55.7, 26.6, 26.4; HRMS (ESI-TOF) *m/z*: C<sub>25</sub>H<sub>22</sub>NO<sub>6</sub>S (M + H)<sup>+</sup> calcd for 464.1162, found 464.1168.

**3-((4-Methoxyphenyl)sulfonyl)-1-methyl-4-(naphthalen-1-yl)-1-azaspiro[4.5]deca-3,6,9-triene-2,8-**

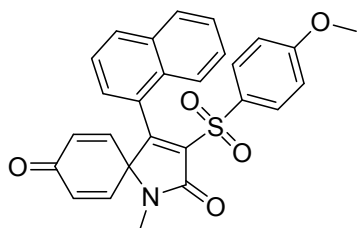

**dione (3va):** yield: 57.5 mg, 61%; red solid; mp 136-137 °C (uncorrected); <sup>1</sup>H NMR (400 MHz, CDCl<sub>3</sub>) δ: 7.88-7.75 (m, 2H), 7.82 (d, *J* = 8.8 Hz, 2H), 7.44 (d, *J* = 6.8 Hz, 1H), 7.42-7.40 (m, 3H), 7.10-7.09 (m, 1H), 6.88 (d, *J* = 8.8 Hz, 2H), 6.60-6.59 (m, 1H),

6.54-6.48 (m, 2H), 6.04-6.01 (m, 1H), 3.85 (s, 3H), 2.92 (s, 3H); <sup>13</sup>C NMR (100 MHz, CDCl<sub>3</sub>) δ: 182.9, 164.3, 163.6, 159.0, 142.4, 142.3, 139.4, 134.6, 133.6, 133.0, 131.9, 130.5, 130.3, 129.6, 129.0, 126.8, 126.3, 126.1, 125.8, 124.7, 124.1, 113.9, 69.4, 55.7, 26.6; HRMS (ESI-TOF) *m/z*: C<sub>27</sub>H<sub>22</sub>NO<sub>5</sub>S (M + H)<sup>+</sup> calcd for 472.1213, found 472.1219.

**3-((4-Methoxyphenyl)sulfonyl)-1-methyl-4-(thiophen-2-yl)-1-azaspiro[4.5]deca-3,6,9-triene-2,8-**

**dione (3wa):** yield: 52.1 mg, 61%; yellow solid; mp 218-219 °C (uncorrected); <sup>1</sup>H NMR (400 MHz, CDCl<sub>3</sub>) δ: 8.05 (d, *J* = 8.8 Hz, 2H), 7.67-7.66 (m, 1H), 7.58-7.56 (m, 1H), 7.15-7.13 (m, 1H), 7.02 (d, *J* = 8.8 Hz, 2H), 6.56 (d, *J* = 10.4 Hz, 2H), 6.43 (d, *J* = 10.0 Hz, 2H), 3.89 (s, 3H), 2.77 (s, 3H); <sup>13</sup>C

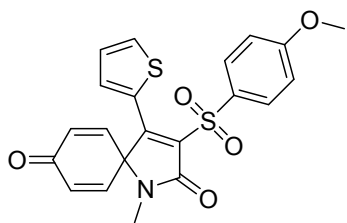

NMR (100 MHz,  $\text{CDCl}_3$ )  $\delta$ : 183.4, 164.3, 163.7, 153.0, 142.7 (2C), 134.6 (2C), 134.5, 134.1, 131.7, 131.5, 130.2, 127.9, 127.7, 114.1, 67.1, 55.6, 25.9; HRMS (ESI-TOF)  $m/z$ :  $\text{C}_{21}\text{H}_{18}\text{NO}_5\text{S}_2$  ( $\text{M} + \text{H}$ )<sup>+</sup> calcd for 428.0621, found 428.0626.

**3-((4-Methoxyphenyl)sulfonyl)-1-methyl-4-pentyl-1-azaspiro[4.5]deca-3,6,9-triene-2,8-dione (3xa):**

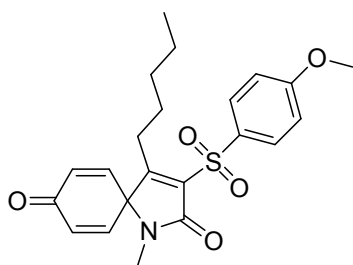

yield: 54.0 mg, 65%; red solid; mp 127-128 °C (uncorrected); <sup>1</sup>H NMR (400 MHz,  $\text{CDCl}_3$ )  $\delta$ : 8.08 (d,  $J$  = 9.2 Hz, 2H), 7.02 (d,  $J$  = 9.2 Hz, 2H), 6.60 (d,  $J$  = 10.0 Hz, 2H), 6.32 (d,  $J$  = 10.0 Hz, 2H), 3.89 (s, 3H), 2.76 (s, 3H), 2.58-2.54 (m, 2H), 1.62-1.58 (m, 2H), 1.39-1.26 (m, 4H), 0.89 (t,  $J$  = 7.2 Hz, 3H); <sup>13</sup>C NMR (100 MHz,  $\text{CDCl}_3$ )  $\delta$ : 183.5, 164.8, 164.3, 164.1, 143.3 (2C), 135.4, 134.1 (2C), 131.5, 130.5, 114.2, 68.2, 55.7, 32.2, 31.0, 26.6, 26.2, 22.0, 13.8; HRMS (ESI-TOF)  $m/z$ :  $\text{C}_{22}\text{H}_{26}\text{NO}_5\text{S}$  ( $\text{M} + \text{H}$ )<sup>+</sup> calcd for 416.1526, found 416.1532.

**3-((4-Methoxyphenyl)sulfonyl)-1,4-dimethyl-1-azaspiro[4.5]deca-3,6,9-triene-2,8-dione (3ya):**

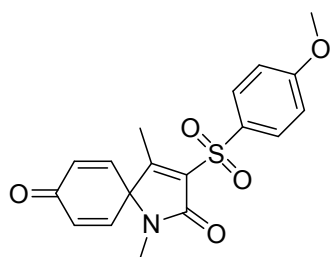

yield: 39.5 mg, 55%; red solid; mp 170-171 °C (uncorrected); <sup>1</sup>H NMR (400 MHz,  $\text{CDCl}_3$ )  $\delta$ : 8.06 (d,  $J$  = 8.8 Hz, 2H), 7.02 (d,  $J$  = 8.8 Hz, 2H), 6.61 (d,  $J$  = 10.0 Hz, 2H), 6.30 (d,  $J$  = 10.0 Hz, 2H), 3.89 (s, 3H), 2.78 (s, 3H), 2.30 (s, 3H); <sup>13</sup>C NMR (100 MHz,  $\text{CDCl}_3$ )  $\delta$ : 183.3, 164.3, 163.9, 160.5, 143.4 (2C), 135.7, 134.4 (2C), 131.3, 130.6, 114.3, 68.1, 55.7, 26.2, 12.0; HRMS (ESI-TOF)  $m/z$ :  $\text{C}_{18}\text{H}_{18}\text{NO}_5\text{S}$  ( $\text{M} + \text{H}$ )<sup>+</sup> calcd for 360.0900, found 360.0906.

**3-((4-Ethoxyphenyl)sulfonyl)-1-methyl-4-phenyl-1-azaspiro[4.5]deca-3,6,9-triene-2,8-dione (3ab):**

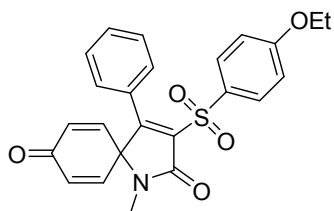

yield: 79.2 mg, 91%; yellow solid; mp 207-208 °C (uncorrected); <sup>1</sup>H NMR (400 MHz,  $\text{CDCl}_3$ )  $\delta$ : 7.95 (d,  $J$  = 8.8 Hz, 2H), 7.44-7.34 (m, 3H), 7.14 (d,  $J$  = 7.2 Hz, 2H), 6.97 (d,  $J$  = 8.8 Hz, 2H), 6.47-6.41 (m, 4H), 4.12-4.07 (m, 2H), 2.83 (s, 3H), 1.44 (t,  $J$  = 6.8 Hz, 3H); <sup>13</sup>C NMR (100 MHz,  $\text{CDCl}_3$ )  $\delta$ : 183.1, 163.7, 163.6, 160.8, 142.3 (2C), 137.0, 134.2 (2C), 131.5, 130.1, 130.0, 128.6, 127.8, 127.7, 114.6, 68.1, 64.0, 26.2, 14.5; HRMS (ESI-TOF)  $m/z$ :  $\text{C}_{24}\text{H}_{22}\text{NO}_5\text{S}$  ( $\text{M} + \text{H}$ )<sup>+</sup> calcd for 436.1213, found 436.1219.

**1-Methyl-3-((4-phenoxyphenyl)sulfonyl)-4-phenyl-1-azaspiro[4.5]deca-3,6,9-triene-2,8-dione**

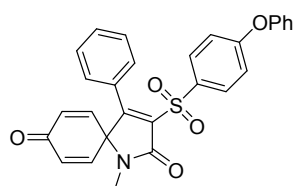

**(3ac):** yield: 85.0 mg, 88%; yellow solid; mp 100-101 °C (uncorrected);

<sup>1</sup>H NMR (400 MHz, CDCl<sub>3</sub>) δ: 7.99-7.97 (m, 2H), 7.44-7.37 (m, 5H), 7.27-7.25 (m, 1H), 7.14 (d, *J* = 8.0 Hz, 2H), 7.10-7.07 (m, 2H), 7.04-7.02 (m, 2H), 6.45 (s, 4H), 2.85 (s, 3H); <sup>13</sup>C NMR (100 MHz, CDCl<sub>3</sub>) δ: 183.1,

163.2, 161.3, 154.5, 142.2 (2C), 134.3 (2C), 132.1, 131.7, 130.3, 130.2 (2C), 128.6, 127.9 (2C), 127.8, 125.3, 120.6, 117.1, 68.2, 26.3; HRMS (ESI-TOF) *m/z*: C<sub>28</sub>H<sub>22</sub>NO<sub>5</sub>S (M + H)<sup>+</sup> calcd for 484.1213, found 484.1219.

**1-Methyl-4-phenyl-3-tosyl-1-azaspiro[4.5]deca-3,6,9-triene-2,8-dione (3ad):** yield: 64.8 mg, 80%;

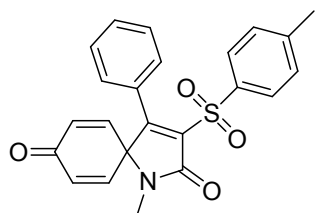

yellow solid; mp 284-285 °C (uncorrected); <sup>1</sup>H NMR (400 MHz, CDCl<sub>3</sub>) δ: 7.93 (d, *J* = 8.4 Hz, 2H), 7.46-7.42 (m, 1H), 7.40-7.33 (m, 4H), 7.16-7.14 (m, 2H), 6.44 (s, 4H), 2.83 (s, 3H), 2.45 (s, 3H); <sup>13</sup>C NMR (100 MHz, CDCl<sub>3</sub>) δ: 183.1, 163.6, 161.5, 145.6, 142.2 (2C),

136.8, 136.1, 134.3 (2C), 130.3, 129.7, 129.3, 128.5, 127.9, 127.8, 68.2, 26.3, 21.8; HRMS (ESI-TOF) *m/z*: C<sub>23</sub>H<sub>20</sub>NO<sub>4</sub>S (M + H)<sup>+</sup> calcd for 406.1108, found 406.1113.

**3-((4-tert-Butyl)phenyl)sulfonyl)-1-methyl-4-phenyl-1-azaspiro[4.5]deca-3,6,9-triene-2,8-dione**

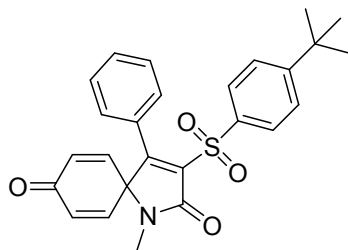

**(3ae):** yield: 68.0 mg, 76%; yellow solid; mp 263-264 °C (uncorrected); <sup>1</sup>H NMR (400 MHz, CDCl<sub>3</sub>) δ: 7.95 (d, *J* = 8.4 Hz, 2H), 7.54 (d, *J* = 8.4 Hz, 2H), 7.44-7.41 (m, 1H), 7.36 (d, *J* = 7.2 Hz, 2H), 7.14 (d, *J* = 7.2 Hz, 2H), 6.49-6.42 (m, 4H), 2.84 (s, 3H), 1.34 (s, 9H); <sup>13</sup>C NMR (100 MHz, CDCl<sub>3</sub>) δ: 183.1, 163.5, 161.5, 158.2,

142.3 (2C), 136.8, 136.0, 134.2 (2C), 130.2, 128.9, 128.5, 127.8, 127.7, 126.1, 68.2, 35.3, 30.9, 26.3; HRMS (ESI-TOF) *m/z*: C<sub>26</sub>H<sub>26</sub>NO<sub>4</sub>S (M + H)<sup>+</sup> calcd for 448.1577, found 448.1583.

**1-Methyl-4-phenyl-3-(phenylsulfonyl)-1-azaspiro[4.5]deca-3,6,9-triene-2,8-dione (3af):** yield: 66.5

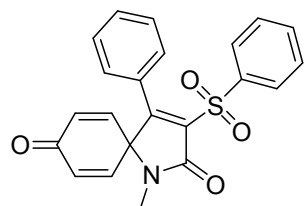

mg, 85%; yellow solid; mp 207-208 °C (uncorrected); <sup>1</sup>H NMR (400 MHz, CDCl<sub>3</sub>) δ: 8.06-8.03 (m, 2H), 7.65 (d, *J* = 7.6 Hz, 1H), 7.57-7.53 (m, 2H), 7.43 (d, *J* = 7.6 Hz, 1H), 7.40-7.36 (m, 2H), 7.16-7.14 (m, 2H), 6.45 (s, 4H), 2.83 (s, 3H); <sup>13</sup>C NMR (100 MHz, CDCl<sub>3</sub>) δ: 183.0, 163.4,

162.1, 142.2 (2C), 139.1, 136.6, 134.3 (2C), 134.3, 130.3, 129.1, 129.0, 128.4, 127.9, 127.7, 68.2, 26.3; HRMS (ESI-TOF) *m/z*: C<sub>22</sub>H<sub>18</sub>NO<sub>4</sub>S (M + H)<sup>+</sup> calcd for 392.0951, found 392.0957.

**3-((4-Fluorophenyl)sulfonyl)-1-methyl-4-phenyl-1-azaspiro[4.5]deca-3,6,9-triene-2,8-dione (3ag):**

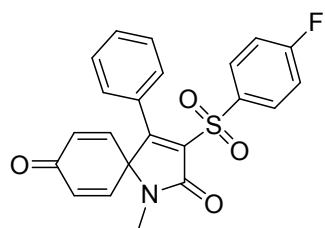

yield: 67.9 mg, 83%; yellow solid; mp 206-207 °C (uncorrected); <sup>1</sup>H NMR (400 MHz, CDCl<sub>3</sub>) δ: 8.09-8.06 (m, 2H), 7.45 (t, *J* = 7.6 Hz, 1H), 7.38 (t, *J* = 7.6 Hz, 2H), 7.22 (t, *J* = 8.4 Hz, 2H), 7.15 (d, *J* = 8.8 Hz, 2H), 6.49-6.43 (m, 4H), 2.84 (s, 3H); <sup>13</sup>C NMR (100 MHz, CDCl<sub>3</sub>) δ: 183.0, 166.3 (d, *J* = 256.1 Hz, 1C), 163.4, 162.1, 142.1, 136.5, 135.0 (d, *J* = 2.9 Hz, 1C), 134.4 (2C), 132.3, 132.2, 130.5, 128.4, 128.0, 127.1, 116.4 (d, *J* = 22.5 Hz, 1C), 68.3, 26.3; <sup>19</sup>F NMR (282 MHz, CDCl<sub>3</sub>) δ: -102.1 (s, 1F); HRMS (ESI-TOF) *m/z*: C<sub>22</sub>H<sub>17</sub><sup>19</sup>FNO<sub>4</sub>S (M + H)<sup>+</sup> calcd for 410.0857, found 410.0862.

**3-((4-Chlorophenyl)sulfonyl)-1-methyl-4-phenyl-1-azaspiro[4.5]deca-3,6,9-triene-2,8-dione (3ah):**

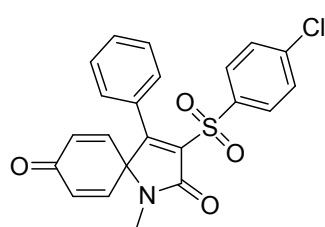

yield: 68.0 mg, 80%; yellow solid; mp 259-260 °C (uncorrected); <sup>1</sup>H NMR (400 MHz, CDCl<sub>3</sub>) δ: 7.98 (d, *J* = 8.4 Hz, 2H), 7.51 (d, *J* = 8.4 Hz, 2H), 7.45 (t, *J* = 7.6 Hz, 1H), 7.38 (t, *J* = 7.6 Hz, 2H), 7.15 (d, *J* = 7.6 Hz, 2H), 6.45 (s, 4H), 2.83 (s, 3H); <sup>13</sup>C NMR (100 MHz, CDCl<sub>3</sub>) δ: 182.9, 163.3, 162.4, 141.9 (2C), 141.2, 137.4, 136.2, 134.4 (2C), 130.7, 130.4, 129.4, 128.3, 128.0, 127.7, 68.3, 26.3; HRMS (ESI-TOF) *m/z*: C<sub>22</sub>H<sub>17</sub><sup>35</sup>ClNO<sub>4</sub>S (M + H)<sup>+</sup> calcd for 426.0561, found 426.0567.

**3-((4-Bromophenyl)sulfonyl)-1-methyl-4-phenyl-1-azaspiro[4.5]deca-3,6,9-triene-2,8-dione (3ai):**

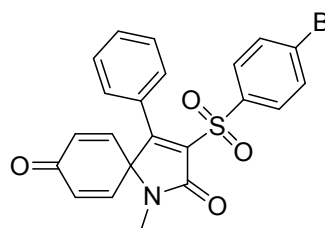

yield: 70.3 mg, 75%; white solid; mp 232-233 °C (uncorrected); <sup>1</sup>H NMR (400 MHz, CDCl<sub>3</sub>) δ: 7.92-7.89 (m, 2H), 7.69-7.67 (m, 2H), 7.45-7.43 (m, 1H), 7.41-7.36 (m, 2H), 7.15-7.13 (m, 2H), 6.45 (s, 4H), 2.83 (s, 3H); <sup>13</sup>C NMR (100 MHz, CDCl<sub>3</sub>) δ: 182.9, 163.3, 162.4, 141.9 (2C), 137.9, 136.2, 134.4 (2C), 132.3, 130.7, 130.5, 130.0, 128.3, 128.0, 127.7, 68.3, 26.3; HRMS (ESI-TOF) *m/z*: C<sub>22</sub>H<sub>17</sub><sup>79</sup>BrNO<sub>4</sub>S (M + H)<sup>+</sup> calcd for 470.0056, found 470.0062.

**Ethyl 4-((1-methyl-2,8-dioxo-4-phenyl-1-azaspiro[4.5]deca-3,6,9-trien-3-yl)sulfonyl)benzoate (3aj):**

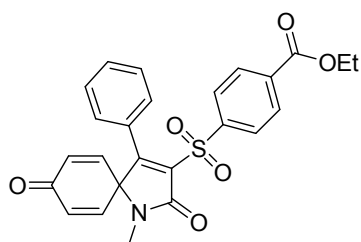

(3aj): yield: 65.8 mg, 71%; red solid; mp 200-201 °C (uncorrected); <sup>1</sup>H NMR (400 MHz, CDCl<sub>3</sub>) δ: 8.20 (d, *J* = 8.8 Hz, 2H), 8.11 (d, *J* = 8.4 Hz, 2H), 7.48-7.45 (m, 1H), 7.41-7.37 (m, 2H), 7.16 (d, *J* = 8.4 Hz, 2H), 6.48-6.42 (m, 4H), 4.45-4.39 (m, 2H), 2.83 (s, 3H), 1.41 (d, *J* = 7.2 Hz, 3H); <sup>13</sup>C NMR (100 MHz,

CDCl<sub>3</sub>)  $\delta$ : 182.9, 164.9, 163.2, 162.9, 142.6, 141.9 (2C), 136.1, 135.6, 134.4 (2C), 130.6, 130.1, 129.2, 128.2, 128.0, 127.7, 68.3, 61.8, 26.3, 14.2; HRMS (ESI-TOF)  $m/z$ : C<sub>25</sub>H<sub>22</sub>NO<sub>5</sub>S (M + H)<sup>+</sup> calcd for 464.1162, found 464.1168.

**1-Methyl-4-phenyl-3-(m-tolylsulfonyl)-1-azaspiro[4.5]deca-3,6,9-triene-2,8-dione (3ak):** yield:

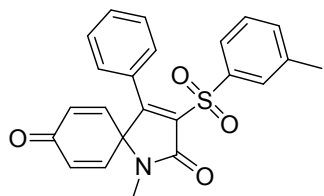

61.6 mg, 76%; yellow solid, mp 230-231 °C (uncorrected); <sup>1</sup>H NMR (400 MHz, CDCl<sub>3</sub>)  $\delta$ : 7.84-7.82 (m, 2H), 7.47-7.43 (m, 3H), 7.40-7.36 (m, 2H), 7.1-7.13 (m, 2H), 6.45 (s, 4H), 2.84 (s, 3H), 2.44 (s, 3H); <sup>13</sup>C NMR (100 MHz, CDCl<sub>3</sub>)  $\delta$ : 183.1, 163.5, 161.9, 142.2 (2C), 139.3, 139.0, 136.7, 135.2, 134.3 (2C), 130.4, 129.4, 128.9, 128.5, 127.9, 127.8, 126.3, 68.2, 26.4, 21.4; HRMS (ESI-TOF)  $m/z$ : C<sub>23</sub>H<sub>20</sub>NO<sub>4</sub>S (M + H)<sup>+</sup> calcd for 406.1108, found 406.1113.

**3-((3-Chlorophenyl)sulfonyl)-1-methyl-4-phenyl-1-azaspiro[4.5]deca-3,6,9-triene-2,8-dione (3al):**

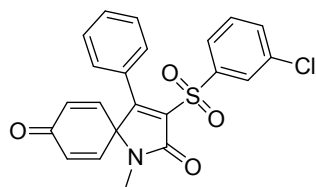

yield: 61.2 mg, 72%; yellow solid; mp 228-229 °C (uncorrected); <sup>1</sup>H NMR (400 MHz, CDCl<sub>3</sub>)  $\delta$ : 7.97-7.95 (m, 2H), 7.62 (d,  $J$  = 7.6 Hz, 1H), 7.51-7.44 (m, 2H), 7.40-7.37 (m, 2H), 7.17-7.14 (m, 2H), 6.49-6.46 (m, 4H), 2.84 (s, 3H); <sup>13</sup>C NMR (100 MHz, CDCl<sub>3</sub>)  $\delta$ : 182.9, 163.2, 162.8, 141.9, 140.7, 136.0, 135.1, 134.4, 134.4, 134.4, 130.5, 130.3, 129.0, 128.2, 128.0, 127.7, 127.7, 127.4, 68.3, 26.3; HRMS (ESI-TOF)  $m/z$ : C<sub>22</sub>H<sub>17</sub><sup>35</sup>ClNO<sub>4</sub>S (M + H)<sup>+</sup> calcd for 426.0561, found 426.0567.

**3-((2-Methoxyphenyl)sulfonyl)-1-methyl-4-phenyl-1-azaspiro[4.5]deca-3,6,9-triene-2,8-dione**

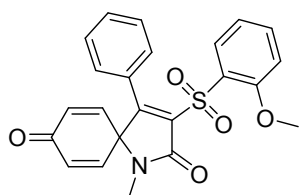

**(3am):** yield: 62.3 mg, 74%; yellow solid; mp 119-120 °C (uncorrected); <sup>1</sup>H NMR (400 MHz, CDCl<sub>3</sub>)  $\delta$ : 8.04 (d,  $J$  = 8.0 Hz, 1H), 7.57-7.56 (m, 1H), 7.38 (d,  $J$  = 7.2 Hz, 1H), 7.34-7.30 (m, 2H), 7.25-7.23 (m, 2H), 7.12-7.10 (m, 1H), 6.95 (d,  $J$  = 8.4 Hz, 1H), 6.47 (s, 4H), 3.87 (s, 3H), 2.81 (s, 3H); <sup>13</sup>C NMR (100 MHz, CDCl<sub>3</sub>)  $\delta$ : 183.2, 163.5, 161.1, 157.3, 142.7 (2C), 136.0, 135.8, 134.1 (2C), 131.1, 130.3, 128.4, 128.1, 127.7, 127.0, 120.8, 112.2, 67.9, 56.2, 26.1; HRMS (ESI-TOF)  $m/z$ : C<sub>23</sub>H<sub>20</sub>NO<sub>5</sub>S (M + H)<sup>+</sup> calcd for 422.1057, found 422.1062.

**1-Methyl-4-phenyl-3-(o-tolylsulfonyl)-1-azaspiro[4.5]deca-3,6,9-triene-2,8-dione (3an):** yield: 56.7

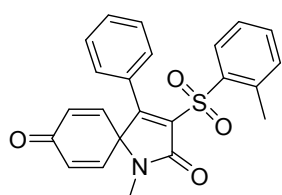

mg, 70%; yellow solid; mp 207-208 °C (uncorrected); <sup>1</sup>H NMR (400 MHz, CDCl<sub>3</sub>)  $\delta$ : 8.11 (d,  $J$  = 8.0 Hz, 1H), 7.50-7.48 (m, 1H), 7.41 (d,  $J$  = 7.2 Hz, 1H), 7.36-7.33 (m, 3H), 7.24-7.21 (m, 3H), 6.47 (s, 4H), 2.81 (s, 3H), 2.46 (s, 3H); <sup>13</sup>C NMR (100 MHz, CDCl<sub>3</sub>)  $\delta$ : 183.0, 163.2, 161.8, 142.3 (2C),

138.0, 136.7, 135.8, 134.2 (2C), 134.2, 132.2, 131.2, 130.5, 128.1, 128.1, 127.9, 126.3, 68.0, 26.2, 20.0; HRMS (ESI-TOF)  $m/z$ :  $C_{23}H_{20}NO_4S$  ( $M + H$ )<sup>+</sup> calcd for 406.1108, found 406.1113.

### 3-((3,5-Dimethylphenyl)sulfonyl)-1-methyl-4-phenyl-1-azaspiro[4.5]deca-3,6,9-triene-2,8-dione

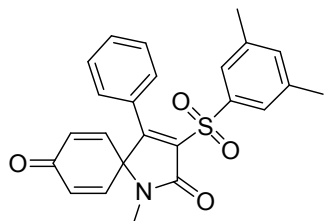

**(3ao)**: yield: 64.5 mg, 77%; yellow solid; mp 211-212 °C (uncorrected); <sup>1</sup>H NMR (400 MHz, CDCl<sub>3</sub>) δ: 7.77-7.73 (m, 2H), 7.43-7.41 (m, 1H), 7.39-7.34 (m, 2H), 7.29 (d,  $J = 8.0$  Hz, 1H), 7.15-7.13 (m, 2H), 6.47-6.41 (m, 4H), 2.83 (s, 3H), 2.33 (s, 3H), 2.32 (s, 3H); <sup>13</sup>C NMR (100 MHz, CDCl<sub>3</sub>) δ: 183.1, 163.5, 161.3, 144.2, 142.3, 137.8, 136.9, 136.2, 134.2, 130.2, 130.2, 129.8, 128.6, 127.8, 127.8, 126.7, 68.2, 26.3, 20.1; HRMS (ESI-TOF)  $m/z$ :  $C_{24}H_{22}NO_4S$  ( $M + H$ )<sup>+</sup> calcd for 420.1264, found 420.1270.

### 3-((4-Methoxyphenyl)sulfonyl)-1,6-dimethyl-4-phenyl-1-azaspiro[4.5]deca-3,6,9-triene-2,8-dione

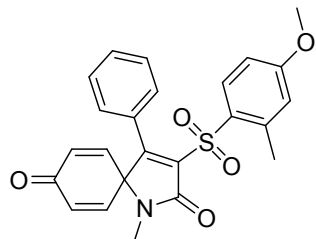

**(3ap)**: yield: 66.1 mg, 76%; red solid; mp 265-266 °C (uncorrected); <sup>1</sup>H NMR (400 MHz, CDCl<sub>3</sub>) δ: 8.09 (d,  $J = 8.8$  Hz, 1H), 7.44-7.40 (m, 1H), 7.37-7.33 (m, 2H), 7.23-7.21 (m, 2H), 6.85-6.83 (m, 1H), 6.71 (s, 1H), 6.50-6.43 (s, 4H), 3.84 (s, 3H), 2.81 (s, 3H), 2.41 (s, 3H); <sup>13</sup>C NMR (100 MHz, CDCl<sub>3</sub>) δ: 183.1, 163.9, 163.5, 161.0, 142.5 (2C), 140.6, 136.3, 134.3 (2C), 134.2, 130.5, 128.4, 128.3, 128.2, 127.9, 117.8, 110.9, 68.0, 55.5, 26.2, 20.4; HRMS (ESI-TOF)  $m/z$ :  $C_{24}H_{22}NO_5S$  ( $M + H$ )<sup>+</sup> calcd for 436.1213, found 436.1219.

### 3-((3,4-Dichlorophenyl)sulfonyl)-1-methyl-4-phenyl-1-azaspiro[4.5]deca-3,6,9-triene-2,8-dione

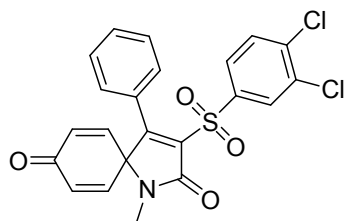

**(3aq)**: yield: 62.4 mg, 68%; red solid; mp 217-218 °C (uncorrected); <sup>1</sup>H NMR (400 MHz, CDCl<sub>3</sub>) δ: 8.07 (s, 1H), 7.91-7.88 (m, 1H), 7.62 (d,  $J = 8.4$  Hz, 1H), 7.46 (t,  $J = 7.2$  Hz, 1H), 7.38 (t,  $J = 7.6$  Hz, 2H), 7.16-7.14 (m, 2H), 6.50-6.44 (m, 4H), 2.84 (s, 3H); <sup>13</sup>C NMR (100 MHz, CDCl<sub>3</sub>) δ: 182.9, 163.1, 162.9, 141.8 (2C), 139.5, 138.5, 135.8, 134.4 (2C), 133.6, 131.0, 131.0, 130.5, 128.4, 128.1, 128.0, 127.7, 68.3, 26.3; HRMS (ESI-TOF)  $m/z$ :  $C_{22}H_{16}^{35}Cl_2NO_4S$  ( $M + H$ )<sup>+</sup> calcd for 460.0172, found 460.0177.

### 1-Methyl-3-(naphthalen-1-ylsulfonyl)-4-phenyl-1-azaspiro[4.5]deca-3,6,9-triene-2,8-dione (3ar):

yield: 62.6 mg, 71%; red solid; mp 104-105 °C (uncorrected); <sup>1</sup>H NMR (400 MHz, CDCl<sub>3</sub>) δ: 8.44 (d,  $J = 8.4$  Hz, 1H), 8.29-8.27 (m, 1H), 8.08 (d,  $J = 8.0$  Hz, 1H), 7.94-7.91 (m, 1H), 7.59-7.55 (m, 3H), 7.43 (d,  $J = 7.6$  Hz, 1H), 7.36 (t,  $J = 7.6$  Hz, 2H), 7.20-7.17 (m, 2H), 6.42 (d,  $J = 10.0$  Hz, 2H), 6.33 (d,  $J =$



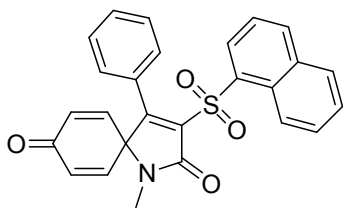

10.0 Hz, 2H), 2.73 (s, 3H);  $^{13}\text{C}$  NMR (100 MHz,  $\text{CDCl}_3$ )  $\delta$ : 183.1, 163.2, 162.0, 142.3 (2C), 135.9, 135.7, 134.2 (2C), 133.8, 133.1, 132.4, 130.6, 129.3, 128.6, 128.3, 128.2, 128.1, 127.9, 126.7, 124.5, 123.4, 67.9, 26.2; HRMS (ESI-TOF)  $m/z$ :  $\text{C}_{26}\text{H}_{20}\text{NO}_4\text{S}$  ( $\text{M} + \text{H}$ ) $^+$  calcd for 442.1108, found 442.1113.

**1-Methyl-3-(naphthalen-2-ylsulfonyl)-4-phenyl-1-azaspiro[4.5]deca-3,6,9-triene-2,8-dione (3a):**

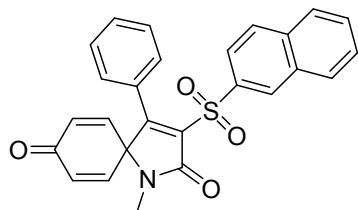

yield: 65.3 mg, 74%; white solid; mp 284-285 °C  $^1\text{H}$  NMR (400 MHz,  $\text{CDCl}_3$ )  $\delta$ : 8.63 (s, 1H), 8.02-7.98 (m, 3H), 7.92 (d,  $J = 8.0$  Hz, 1H), 7.69-7.62 (m, 2H), 7.44 (d,  $J = 7.6$  Hz, 1H), 7.39 (d,  $J = 7.2$  Hz, 2H), 7.17 (d,  $J = 8.4$  Hz, 2H), 6.44 (s, 4H), 2.82 (s, 3H);  $^{13}\text{C}$  NMR (100 MHz,  $\text{CDCl}_3$ )  $\delta$ : 183.0, 163.5, 162.0, 142.2 (2C), 136.7, 135.9, 135.6, 134.3 (2C), 132.0, 131.6, 130.4, 129.8, 129.6, 129.2, 128.5, 127.9, 127.9, 127.8, 127.6, 123.4, 68.3, 26.3; HRMS (ESI-TOF)  $m/z$ :  $\text{C}_{26}\text{H}_{20}\text{NO}_4\text{S}$  ( $\text{M} + \text{H}$ ) $^+$  calcd for 442.1108, found 442.1113.

**2-((4-Methoxyphenyl)sulfonyl)ethene-1,1-diyl)dibenzene (4):** yield: 39.9 mg, 57%; white solid; mp

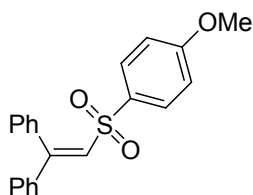

84-85 °C (uncorrected);  $^1\text{H}$  NMR (400 MHz,  $\text{CDCl}_3$ )  $\delta$ : 7.49 (d,  $J = 9.2$  Hz, 2H), 7.36-7.26 (m, 6H), 7.21-7.18 (m, 2H), 7.11-7.08 (m, 2H), 7.01 (s, 1H), 6.80 (d,  $J = 9.2$  Hz, 2H), 3.80 (s, 3H);  $^{13}\text{C}$  NMR (100 MHz,  $\text{CDCl}_3$ )  $\delta$ : 163.0, 154.1, 139.0, 135.4, 132.9, 130.1, 129.7, 129.6, 129.2, 128.7, 128.4, 128.0, 127.7, 113.8, 55.5; HRMS (ESI-TOF)  $m/z$ :  $\text{C}_{21}\text{H}_{19}\text{O}_3\text{S}$  ( $\text{M} + \text{H}$ ) $^+$  calcd for 351.1049, found 351.1055.

**7-Methoxy-3-((4-methoxyphenyl)sulfonyl)-4-phenyl-2H-chromen-2-one (6):** yield: 67.5 mg, 80%;

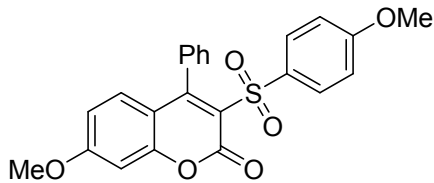

yellow oli;  $^1\text{H}$  NMR (400 MHz,  $\text{CDCl}_3$ )  $\delta$ : 7.93 (d,  $J = 8.8$  Hz, 2H), 7.56-7.55 (m, 3H), 7.32-7.30 (m, 2H), 6.96-6.93 (m, 2H), 6.88 (d,  $J = 8.8$  Hz, 1H), 6.78 (s, 1H), 6.74-6.71 (m, 1H), 3.86 (s, 3H), 3.84 (s, 3H);  $^{13}\text{C}$  NMR (100 MHz,  $\text{CDCl}_3$ )  $\delta$ : 165.0, 163.6, 158.9, 156.1, 155.9, 133.1, 131.9, 131.4, 131.1, 128.9, 128.0, 127.3, 122.7, 113.7, 113.6, 113.4, 100.1, 56.0, 55.6; HRMS (ESI-TOF)  $m/z$ :  $\text{C}_{23}\text{H}_{19}\text{O}_6\text{S}$  ( $\text{M} + \text{H}$ ) $^+$  calcd for 423.0897, found 423.0902.

#### 4. Reference

- [1] S. Tang, P. Peng, S.-F. Pi, Y. Liang, N.-X. Wang and J.-H. Li, *Org. Lett.*, 2008, **10**, 1179.
- [2] Q.-F. Yu, Y.-H. Zhang, Q. Yin, B.-X. Tang, R.-Y. Tang, P. Zhang and J.-H. Li, *J. Org. Chem.*; 2008, **7**, 3658.
- [3] Y. Liu, Q.-L. Wang, C.-S. Zhou, B.-Q. Xiong, P.-L. Zhang, C.-A. Yang and K.-W. Tang, *J. Org. Chem.*; 2018, **83**, 2210.

## (5) Spectra

3-((4-Methoxyphenyl)sulfonyl)-1-methyl-4-phenyl-1-azaspiro[4.5]deca-3,6,9-triene-2,8-dione (3aa)

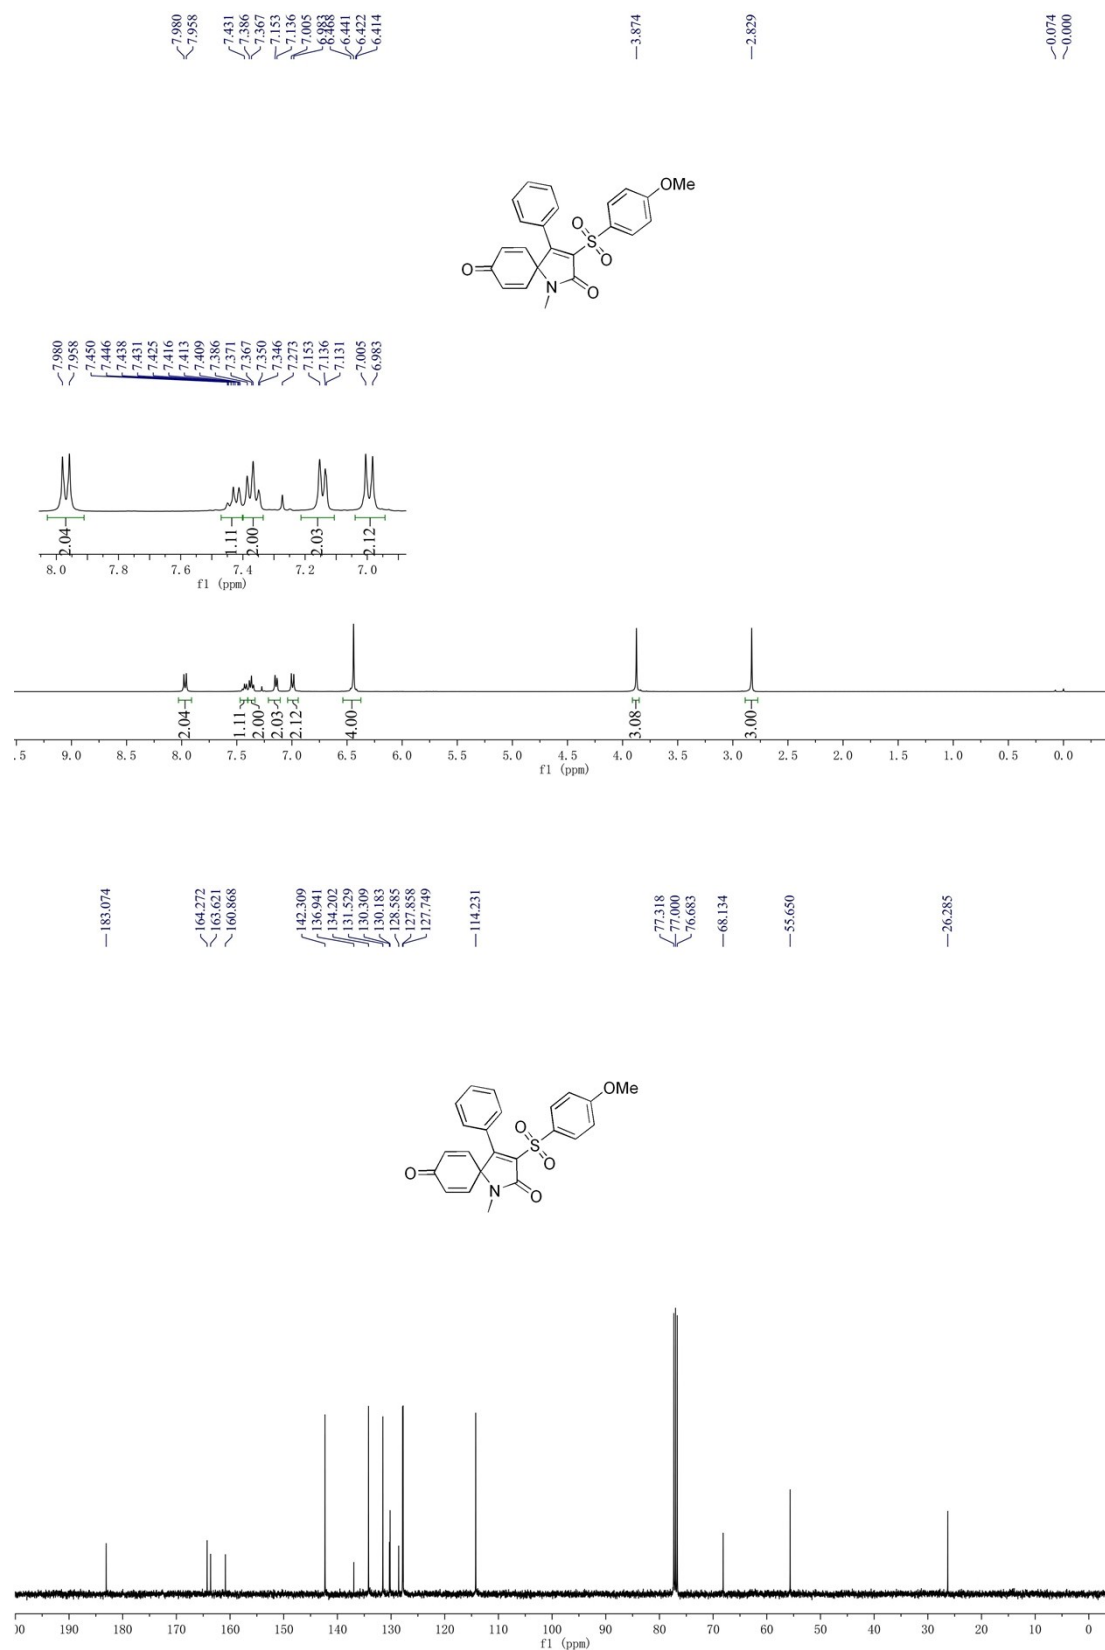

1-Benzyl-3-((4-methoxyphenyl)sulfonyl)-4-phenyl-1-azaspiro[4.5]deca-3,6,9-triene-2,8-dione (3ba)

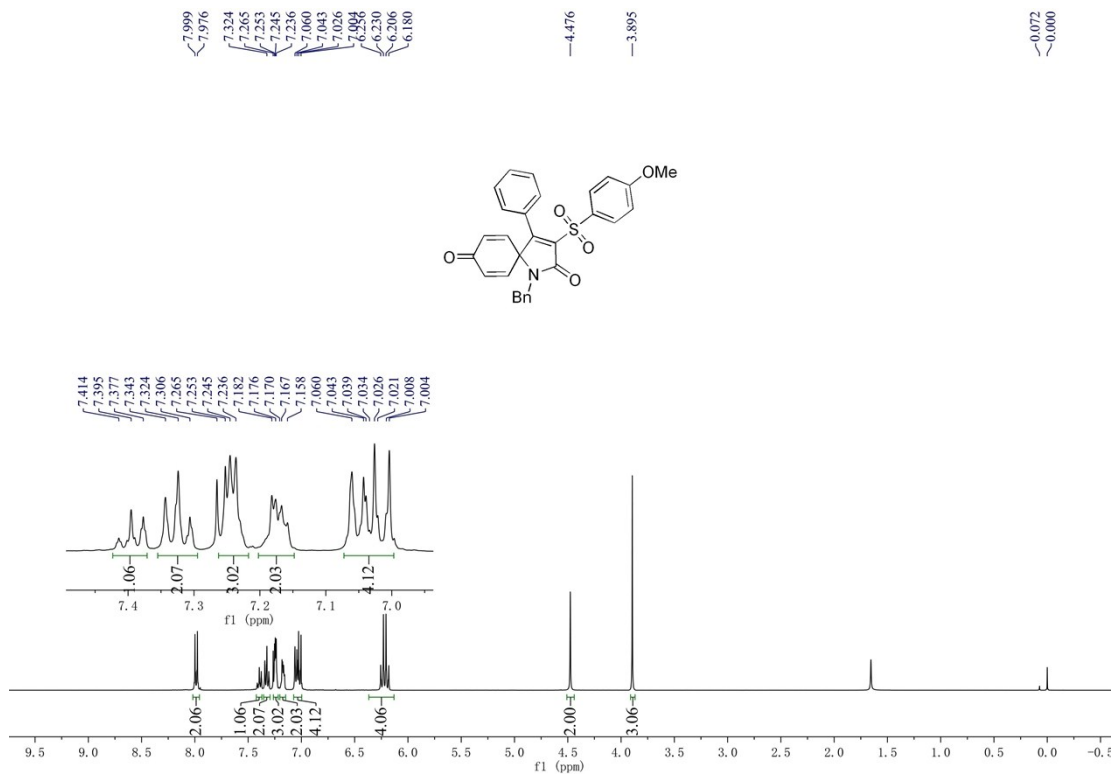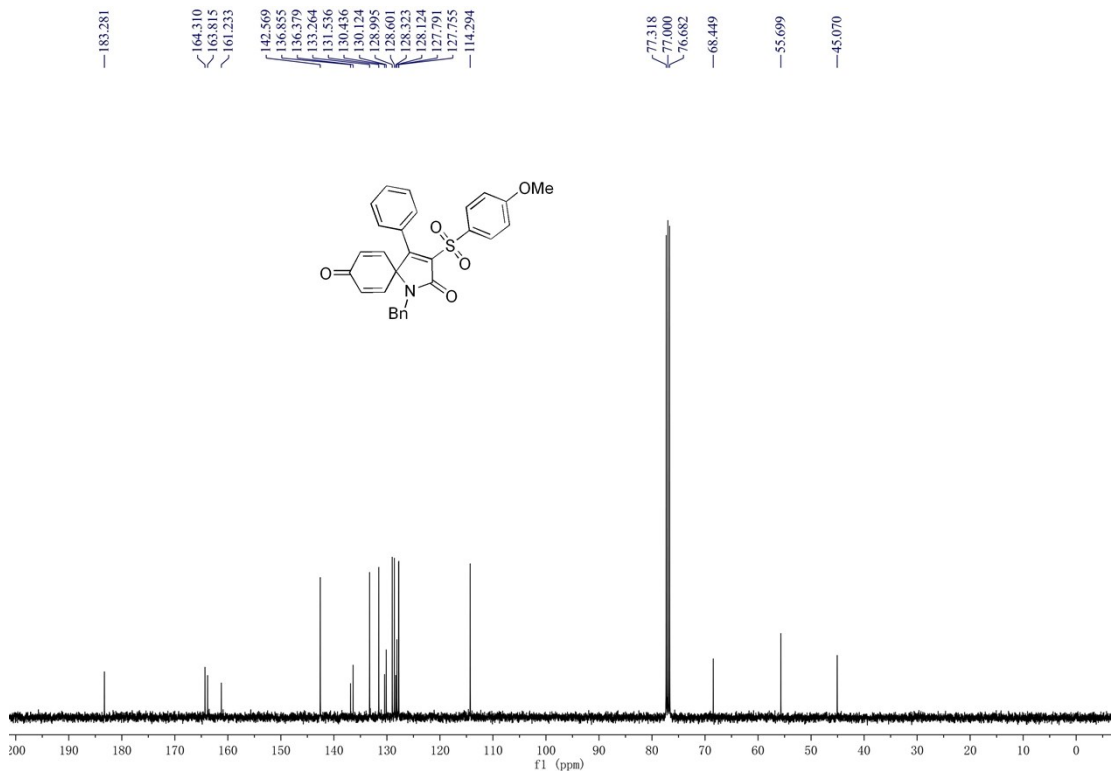

**1-(2-Iodobenzyl)-3-((4-methoxyphenyl)sulfonyl)-4-phenyl-1-azaspiro[4.5]deca-3,6,9-triene-2,8-dione (3ca)**

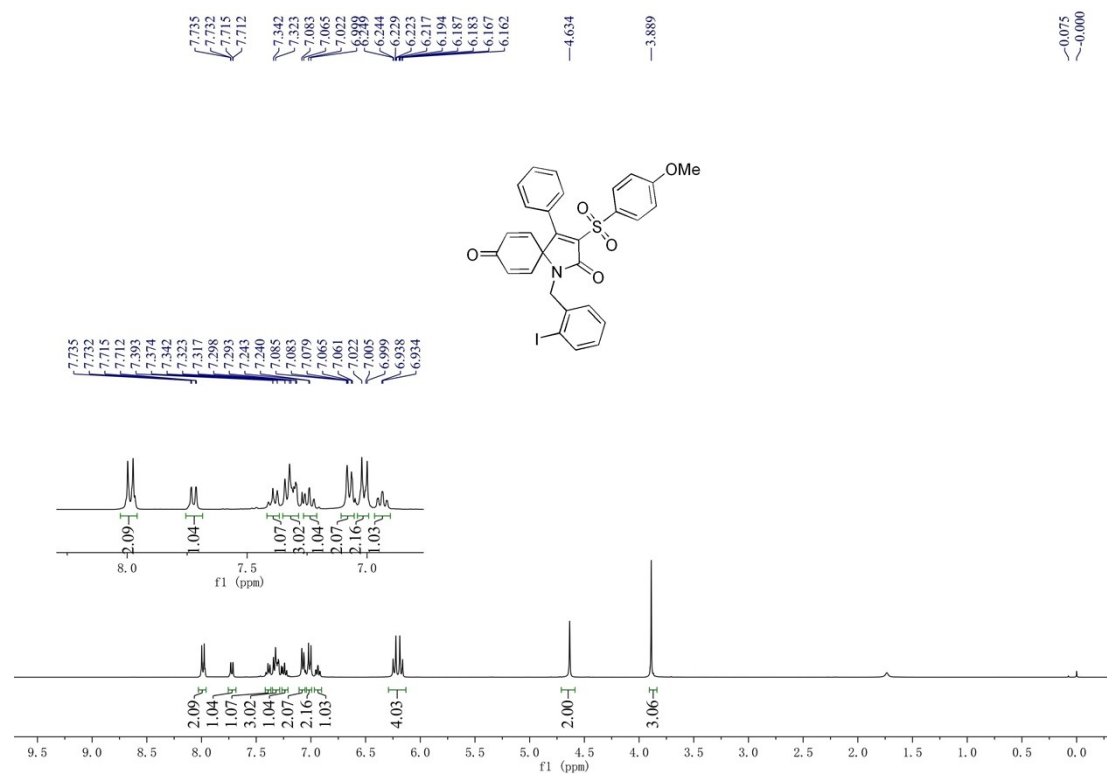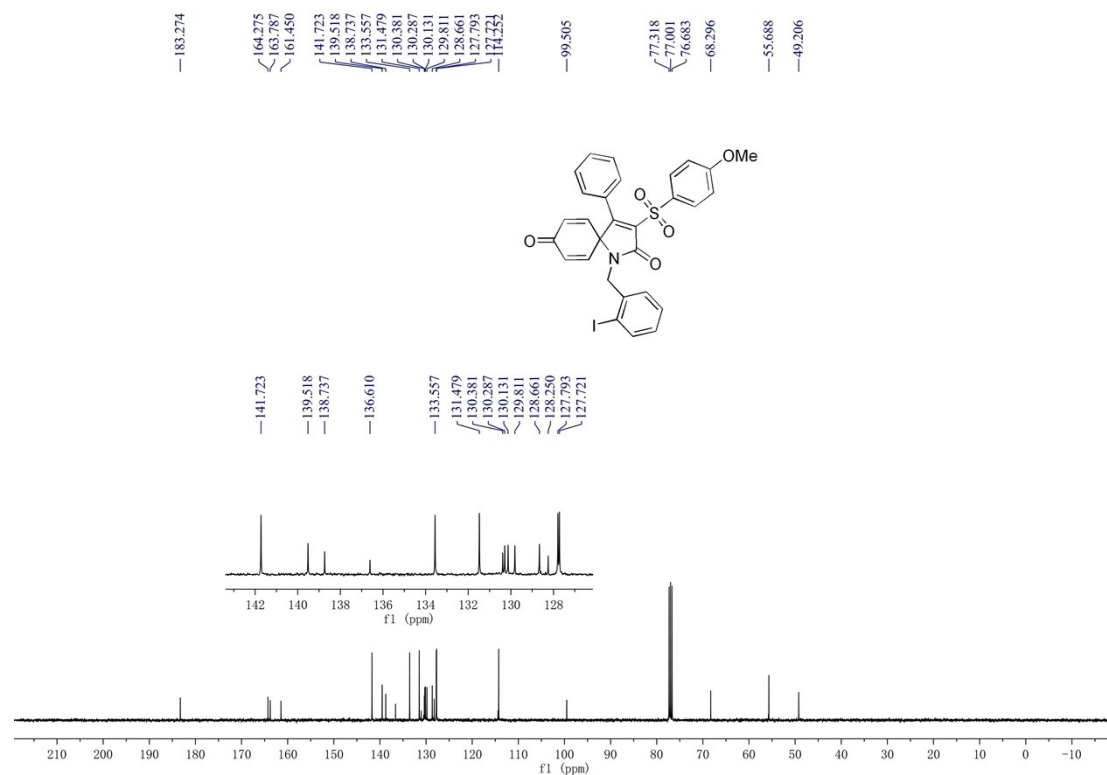

1-Acetyl-3-((4-methoxyphenyl)sulfonyl)-4-phenyl-1-azaspiro[4.5]deca-3,6,9-triene-2,8-dione (3ea)

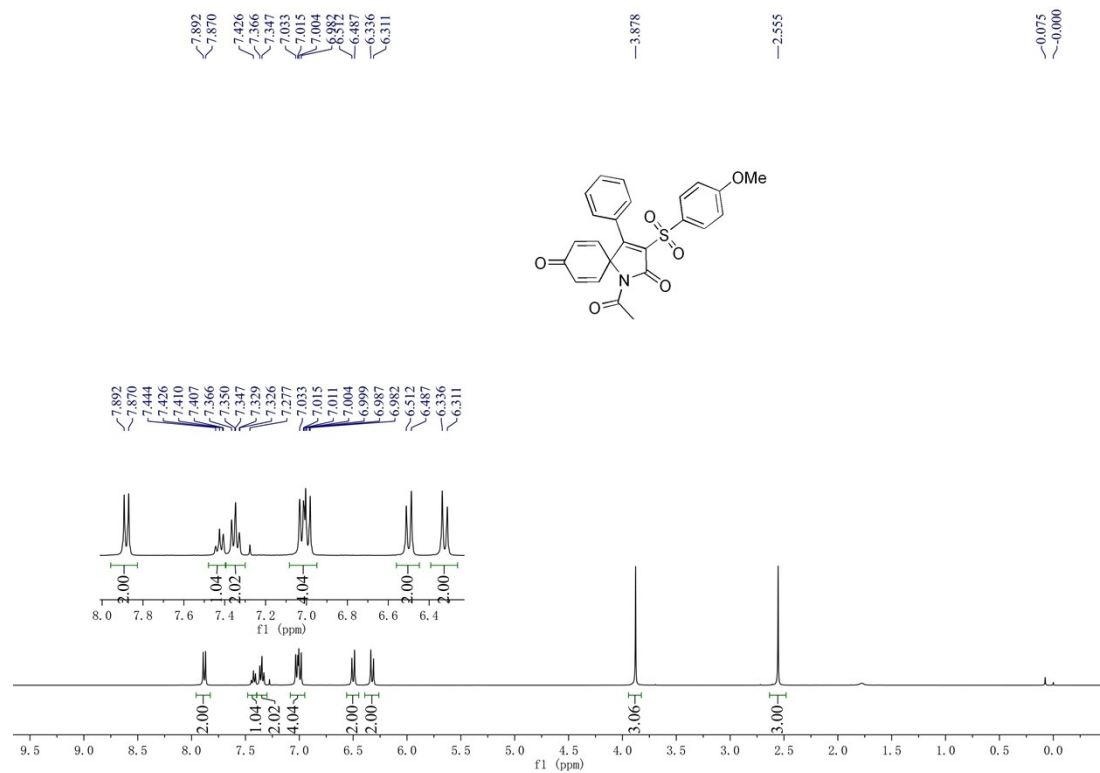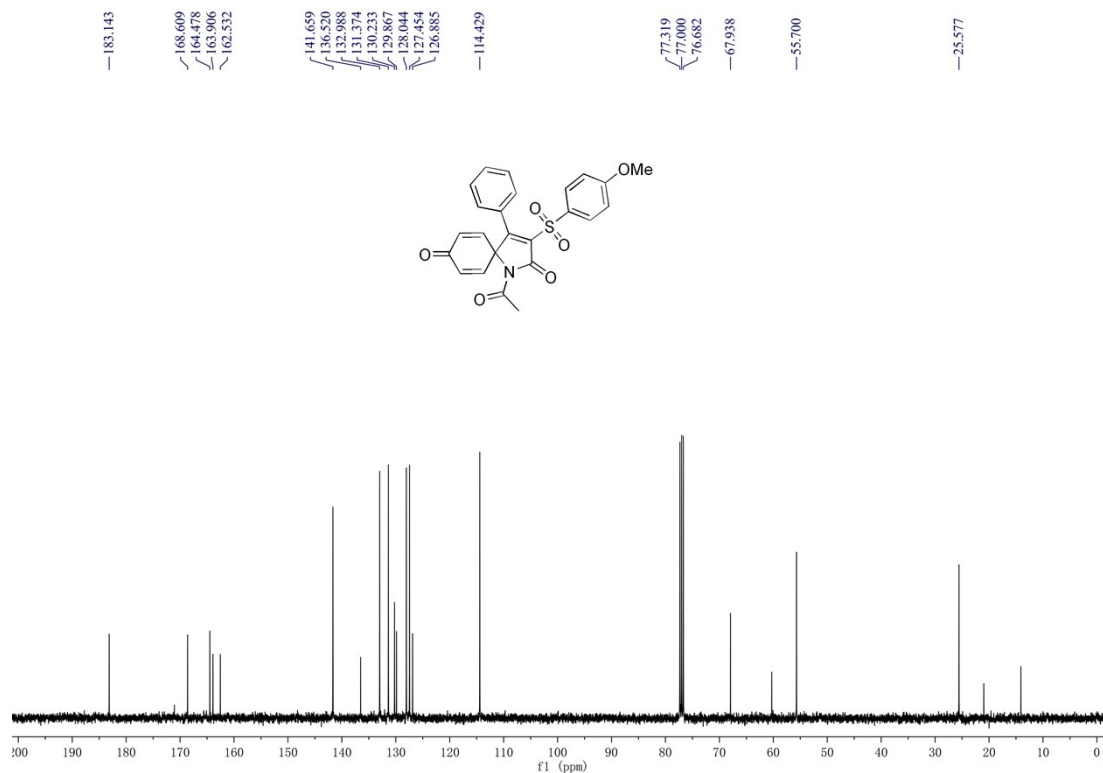

**3-((4-Methoxyphenyl)sulfonyl)-1,6-dimethyl-4-phenyl-1-azaspiro[4.5]deca-3,6,9-triene-2,8-dione (3fa)**

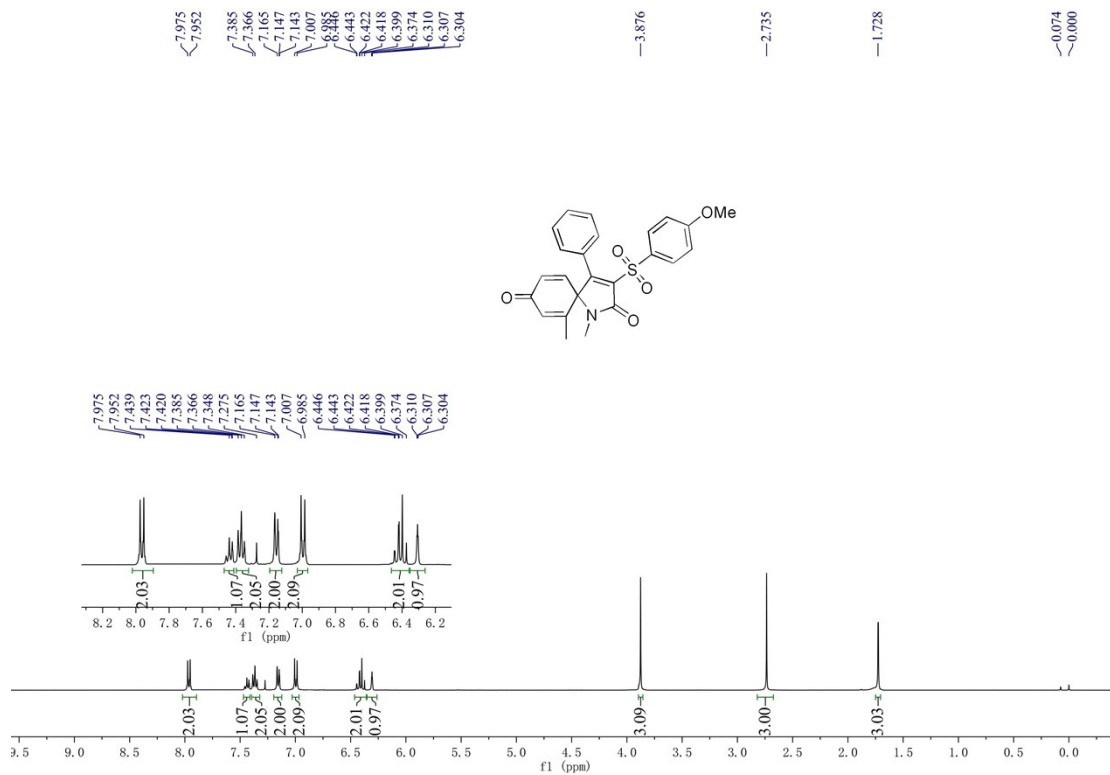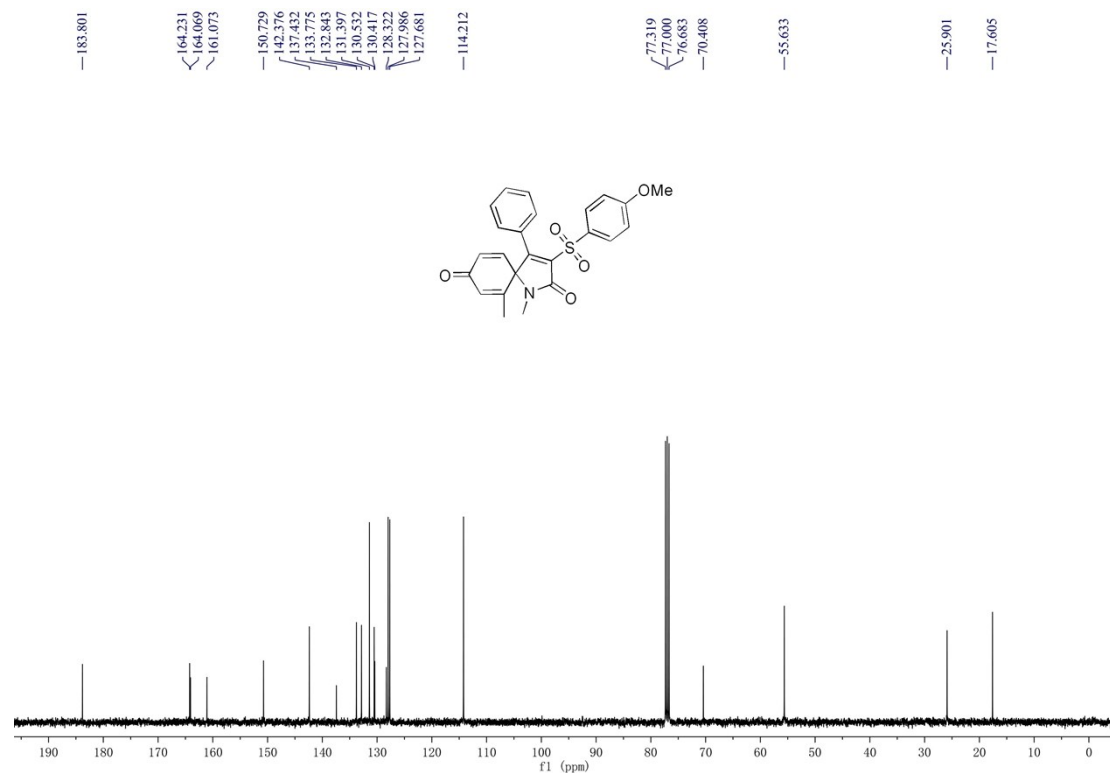

**6-Chloro-3-((4-methoxyphenyl)sulfonyl)-1-methyl-4-phenyl-1-azaspiro[4.5]deca-3,6,9-triene-2,8-dione (3ga)**

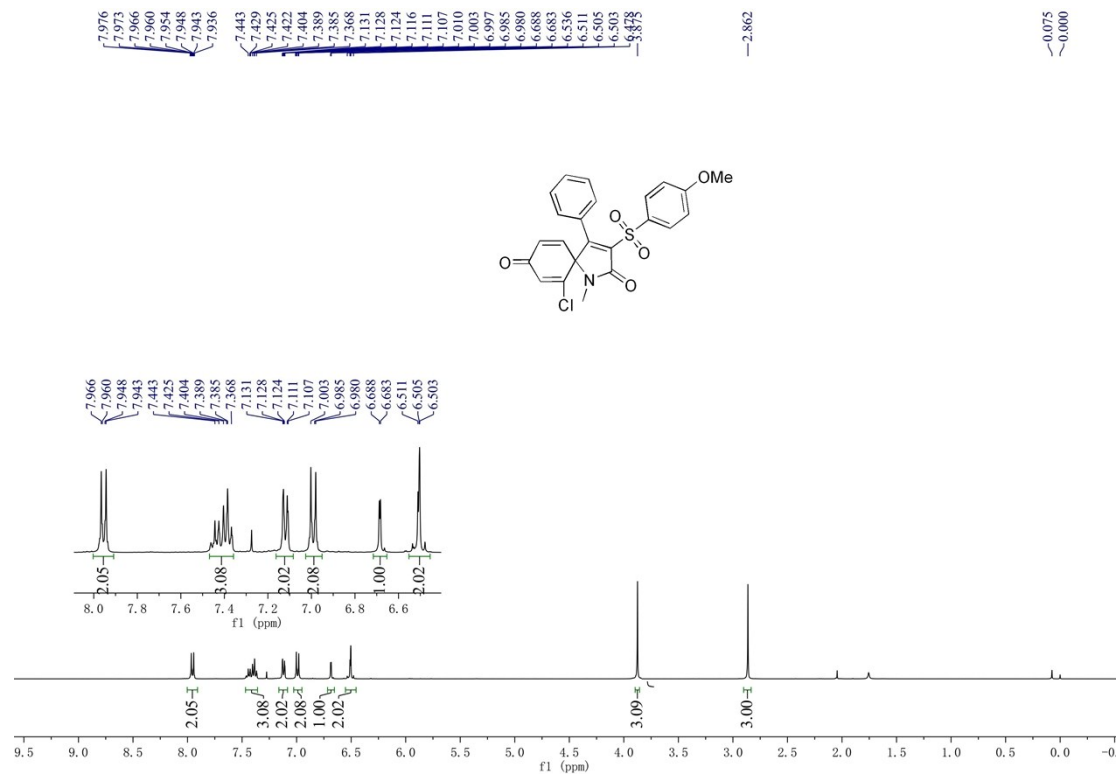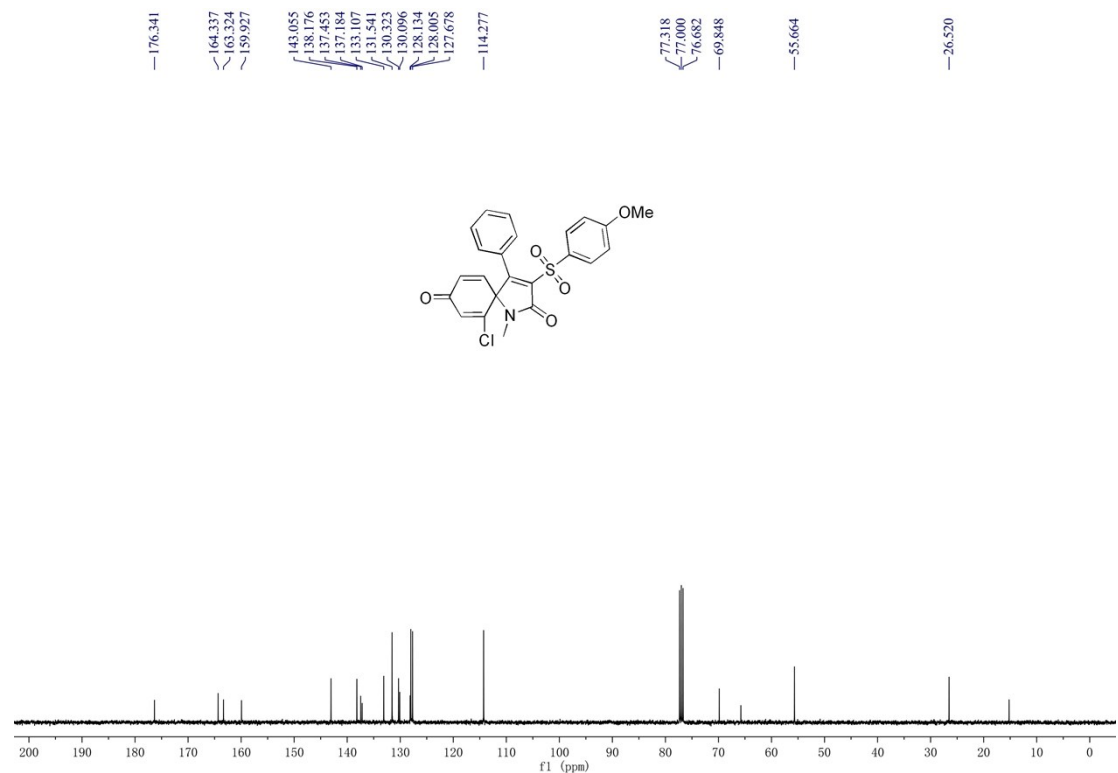



**6-Iodo-3-((4-methoxyphenyl)sulfonyl)-1-methyl-4-phenyl-1-azaspiro[4.5]deca-3,6,9-triene-2,8-dione (3ha)**

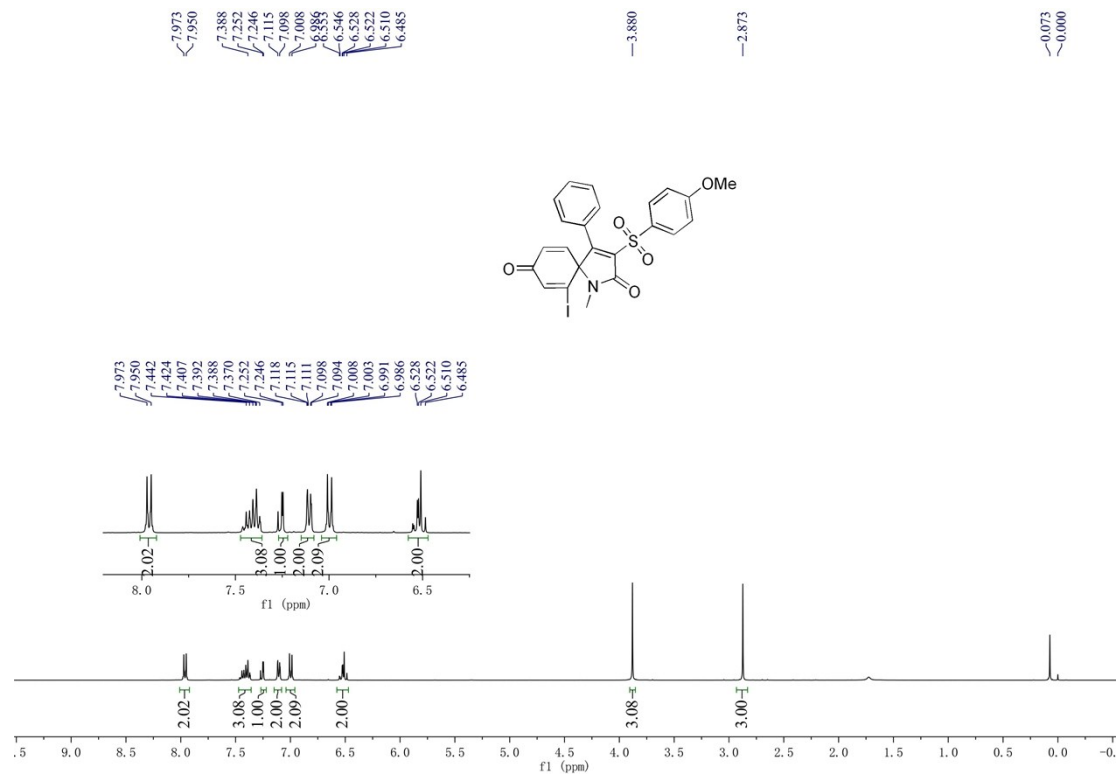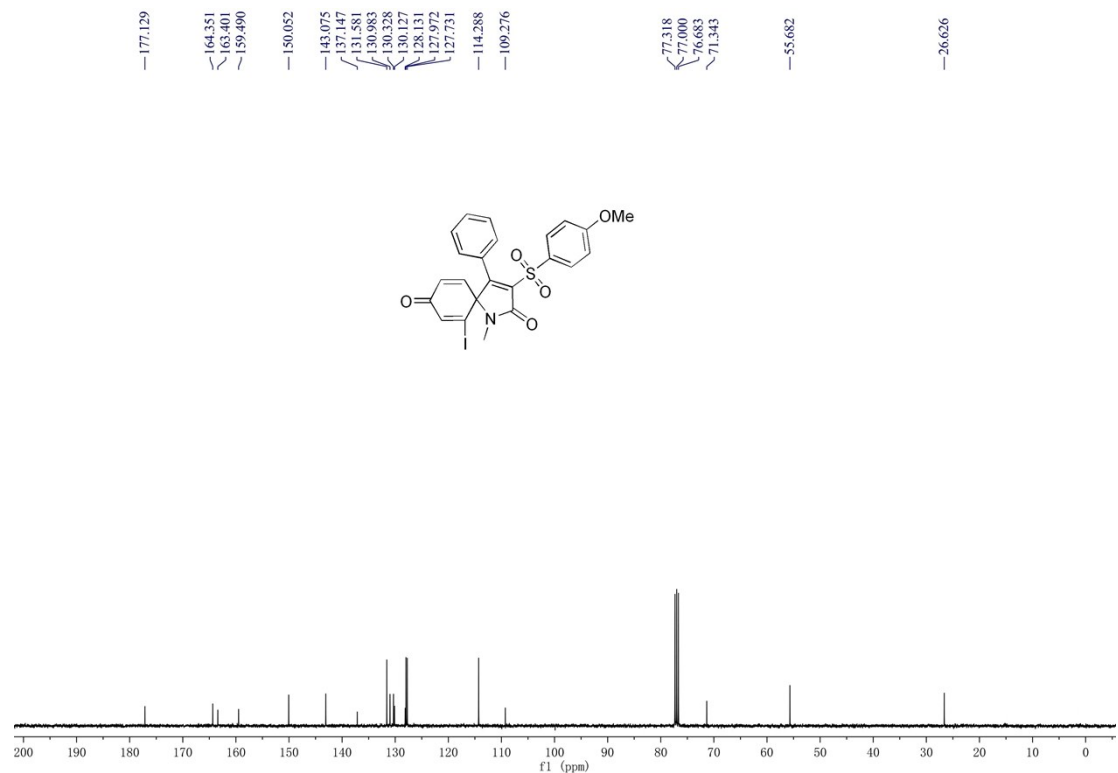

7-Methoxy-3-((4-methoxyphenyl)sulfonyl)-1-methyl-4-phenyl-1-azaspiro[4.5]deca-3,6,9-triene-2,8-dione (3ia)

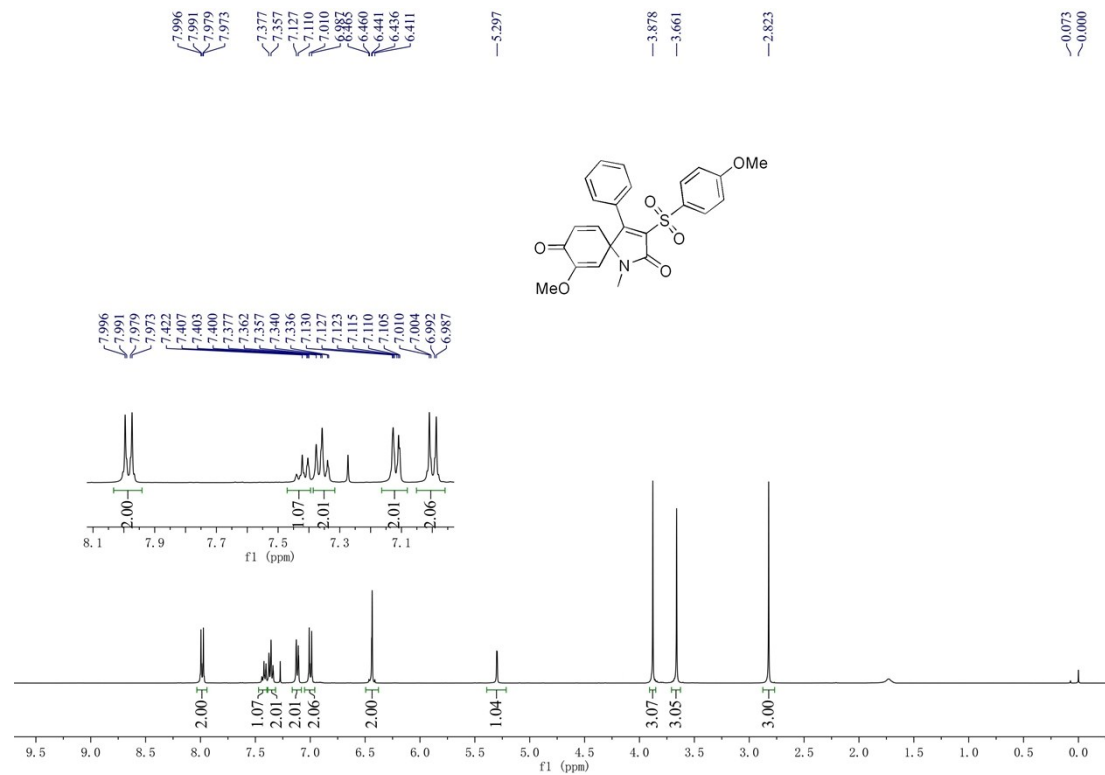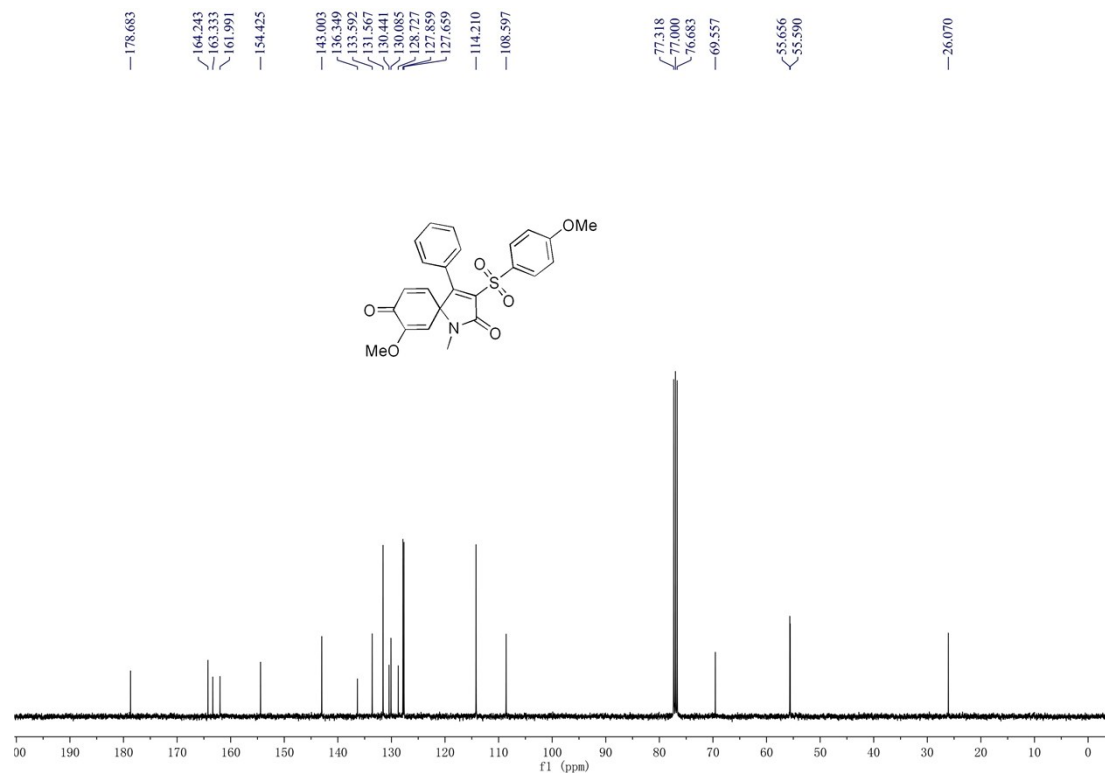

7-Chloro-3-((4-methoxyphenyl)sulfonyl)-1-methyl-4-phenyl-1-azaspiro[4.5]deca-3,6,9-triene-2,8-dione (3ja)

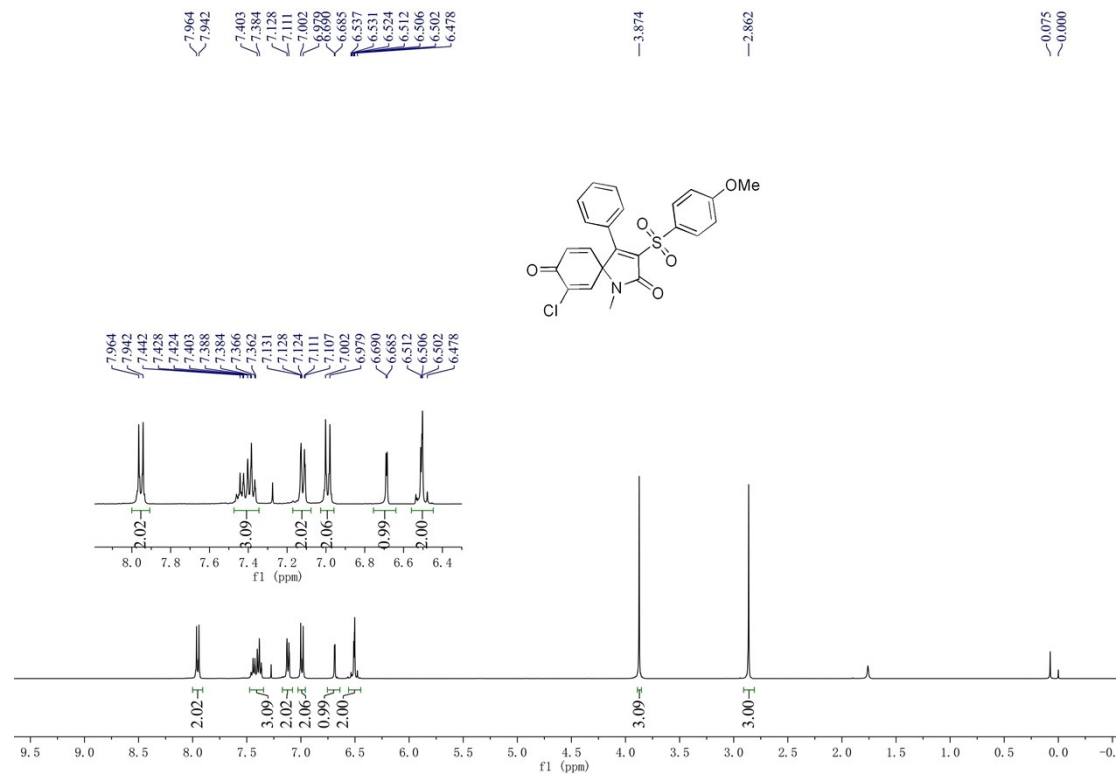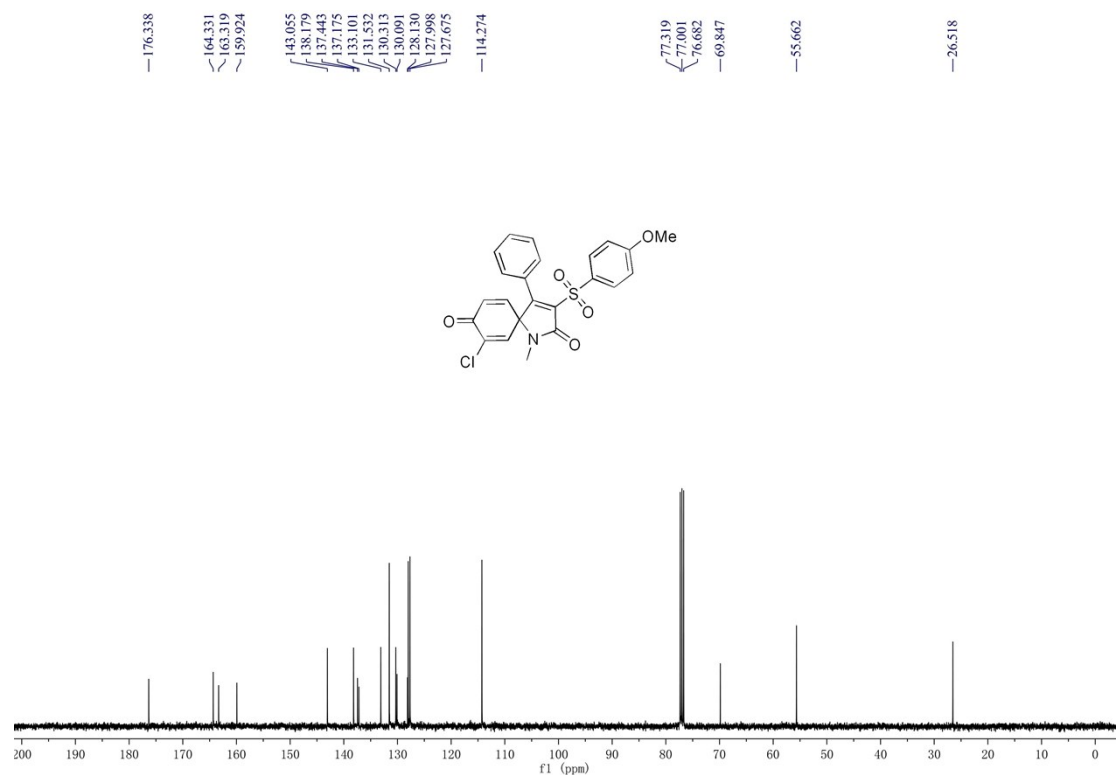

4-(2-Ethylphenyl)-3-((4-methoxyphenyl)sulfonyl)-1-methyl-1-azaspiro[4.5]deca-3,6,9-triene-2,8-dione (3ka)

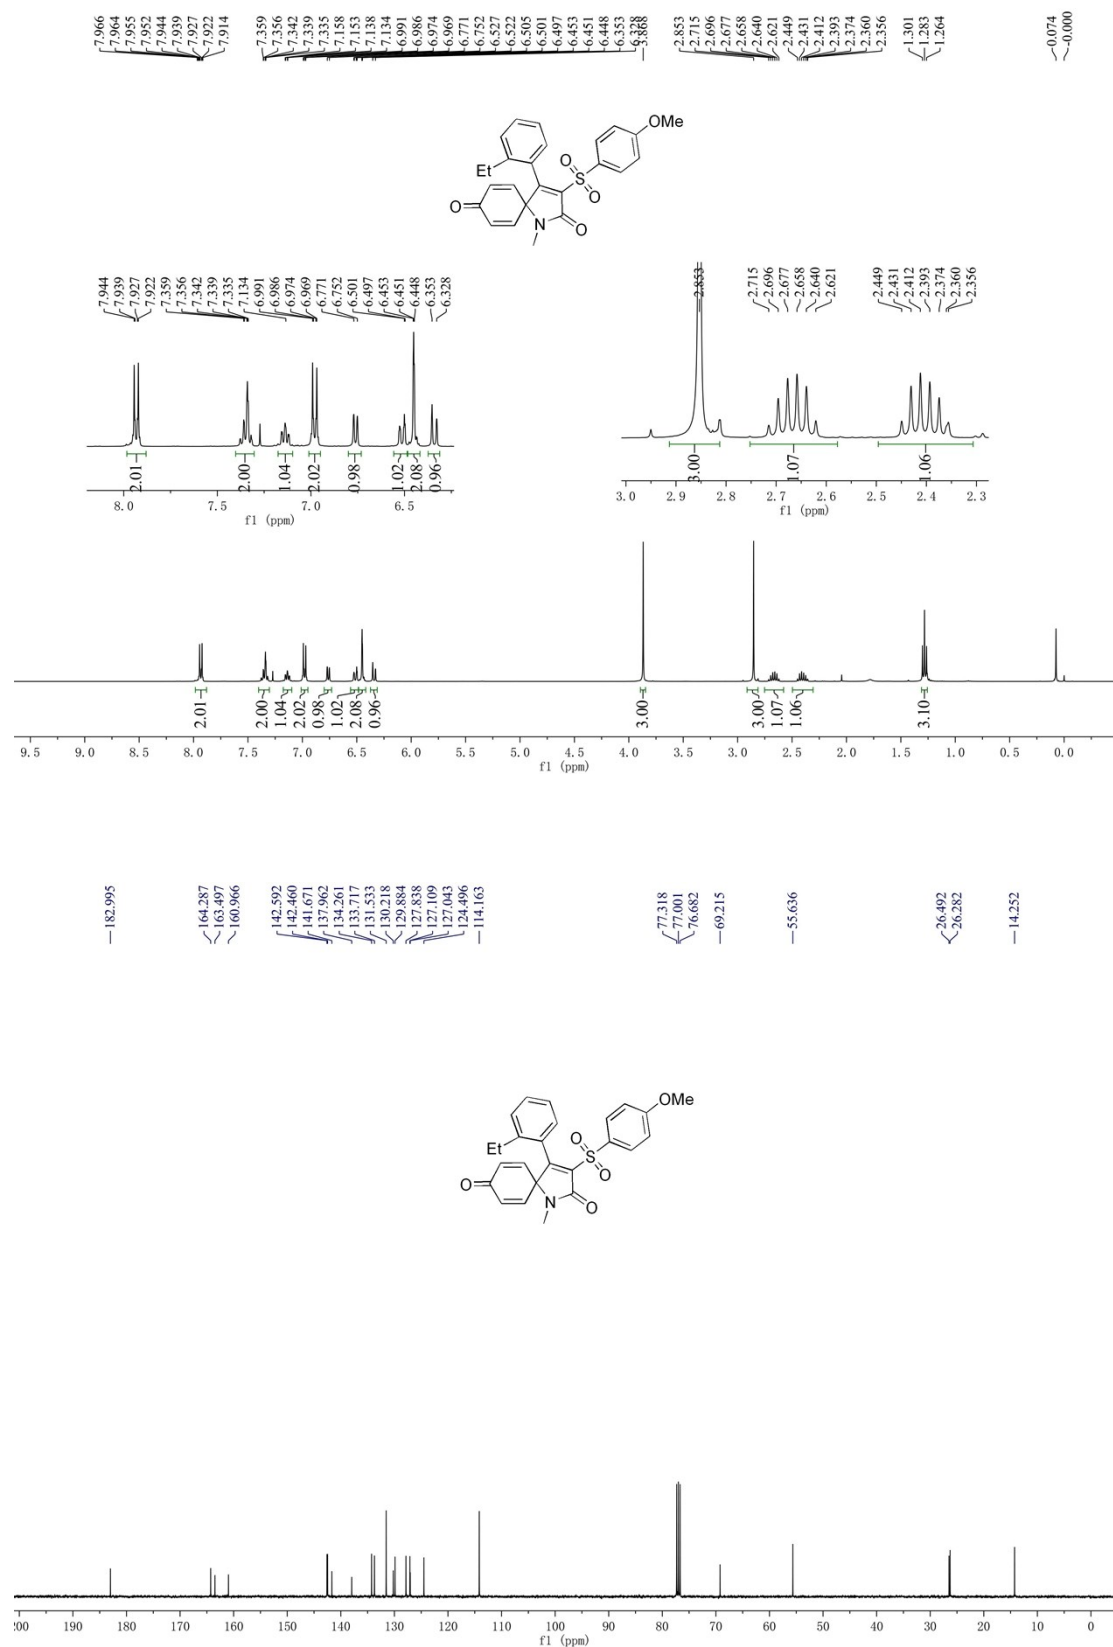

**3-((4-Methoxyphenyl)sulfonyl)-1-methyl-4-(*o*-tolyl)-1-azaspiro[4.5]deca-3,6,9-triene-2,8-dione (31a)**

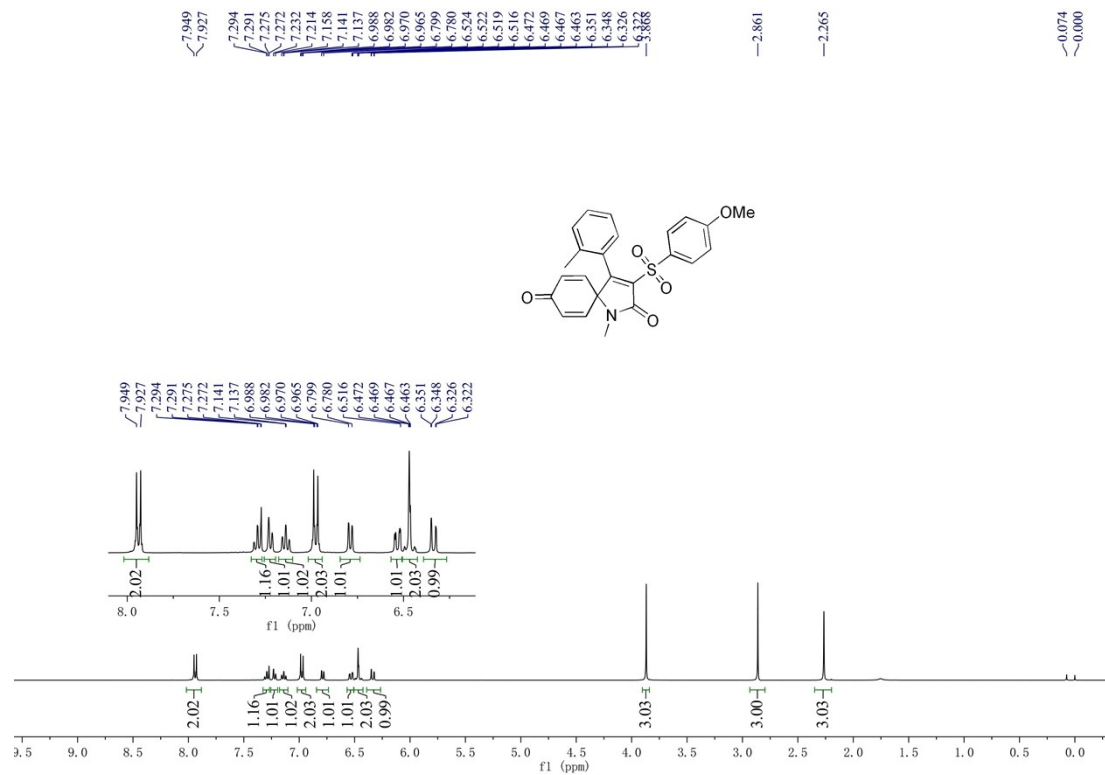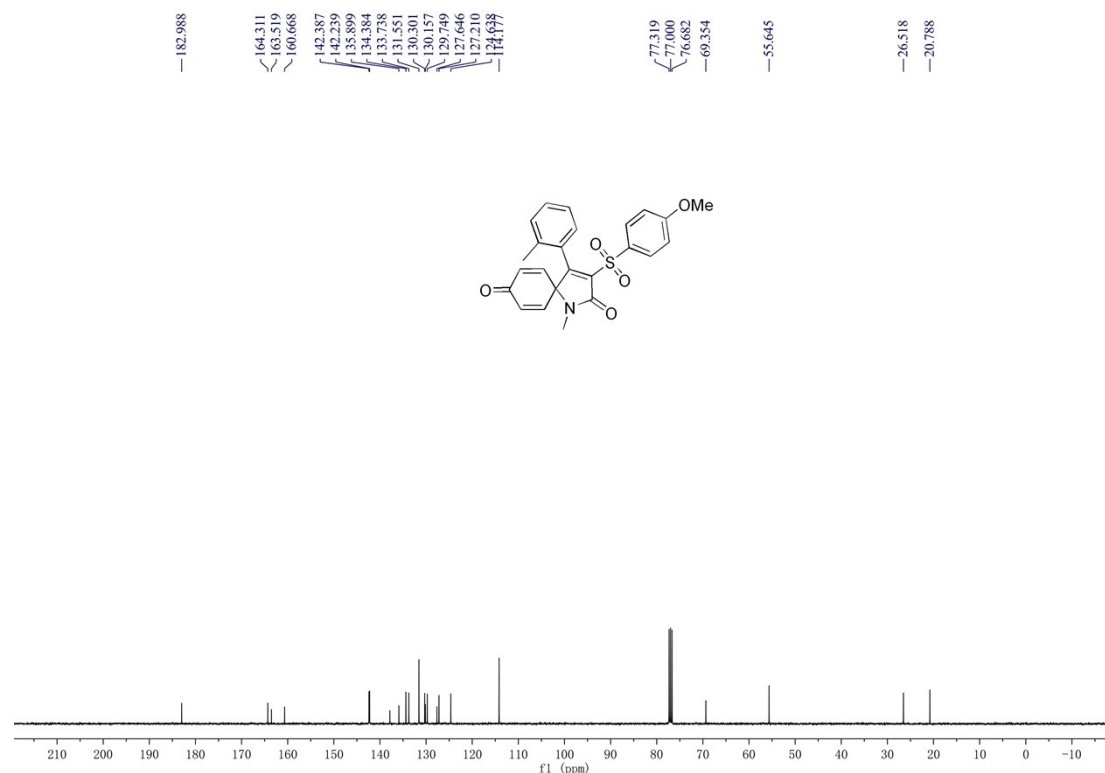

3-((4-Methoxyphenyl)sulfonyl)-1-methyl-4-(*m*-tolyl)-1-azaspiro[4.5]deca-3,6,9-triene-2,8-dione (3ma)

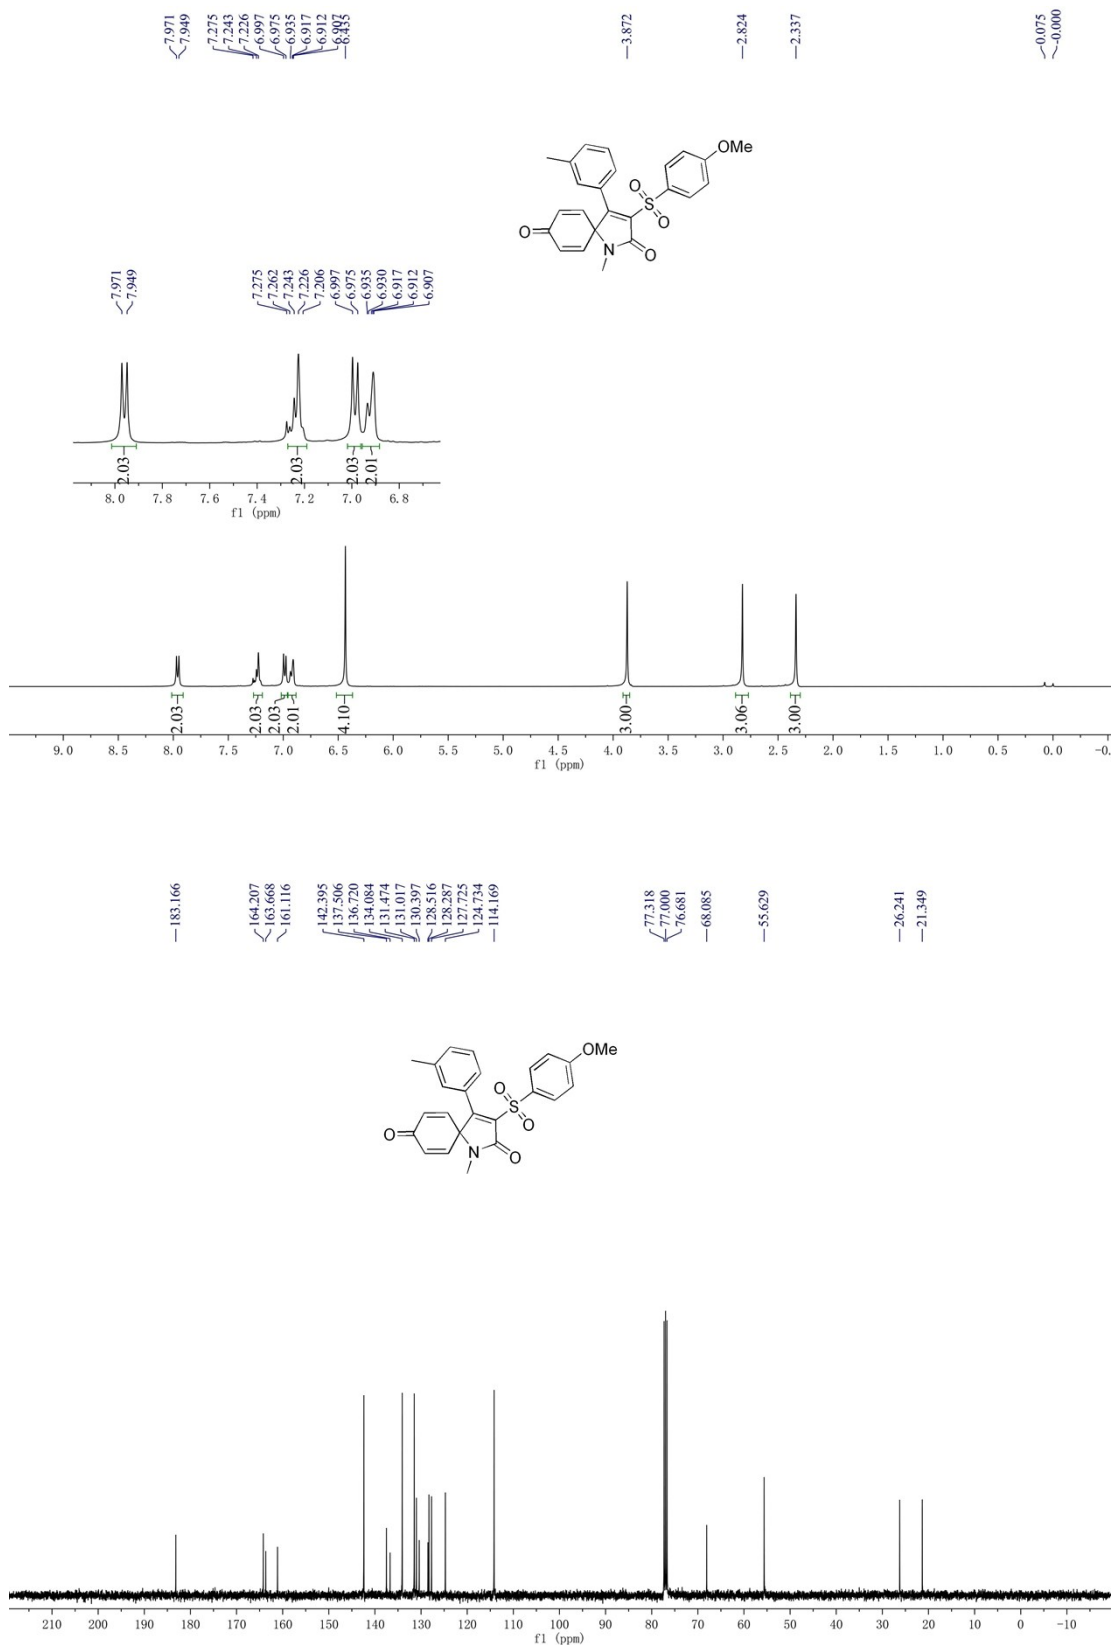

4-(3,5-Dimethylphenyl)-3-((4-methoxyphenyl)sulfonyl)-1-methyl-1-azaspiro[4.5]deca-3,6,9-triene-2,8-dione

(3na)

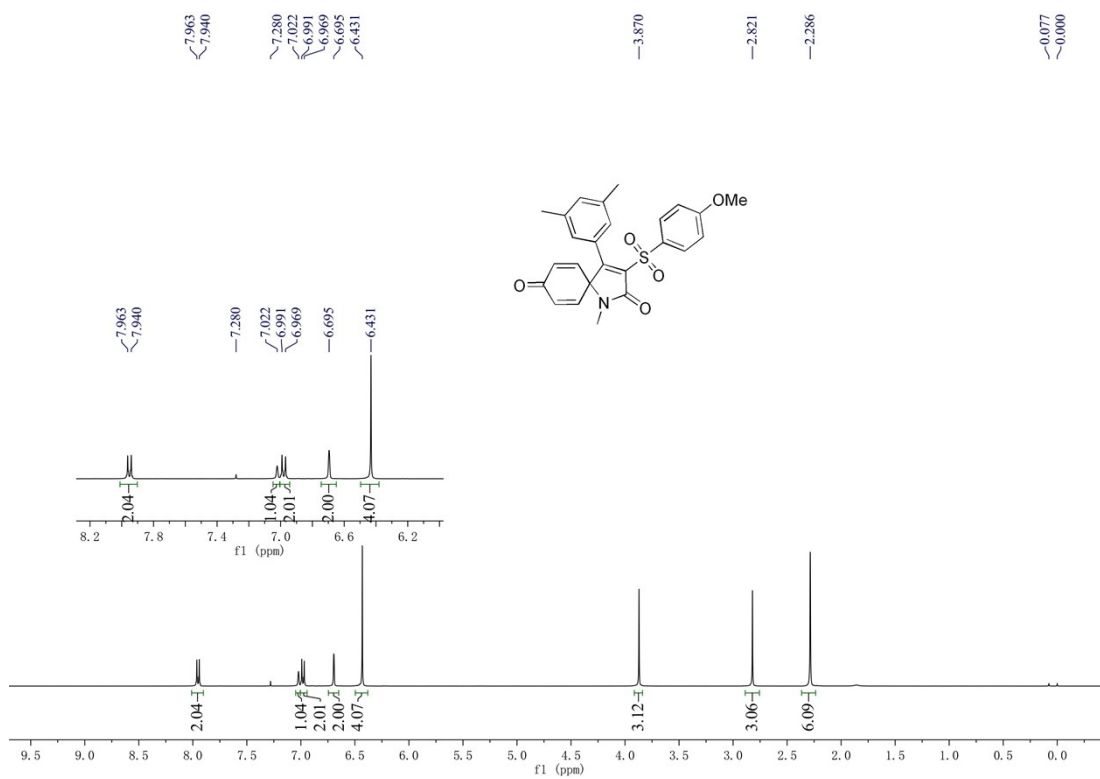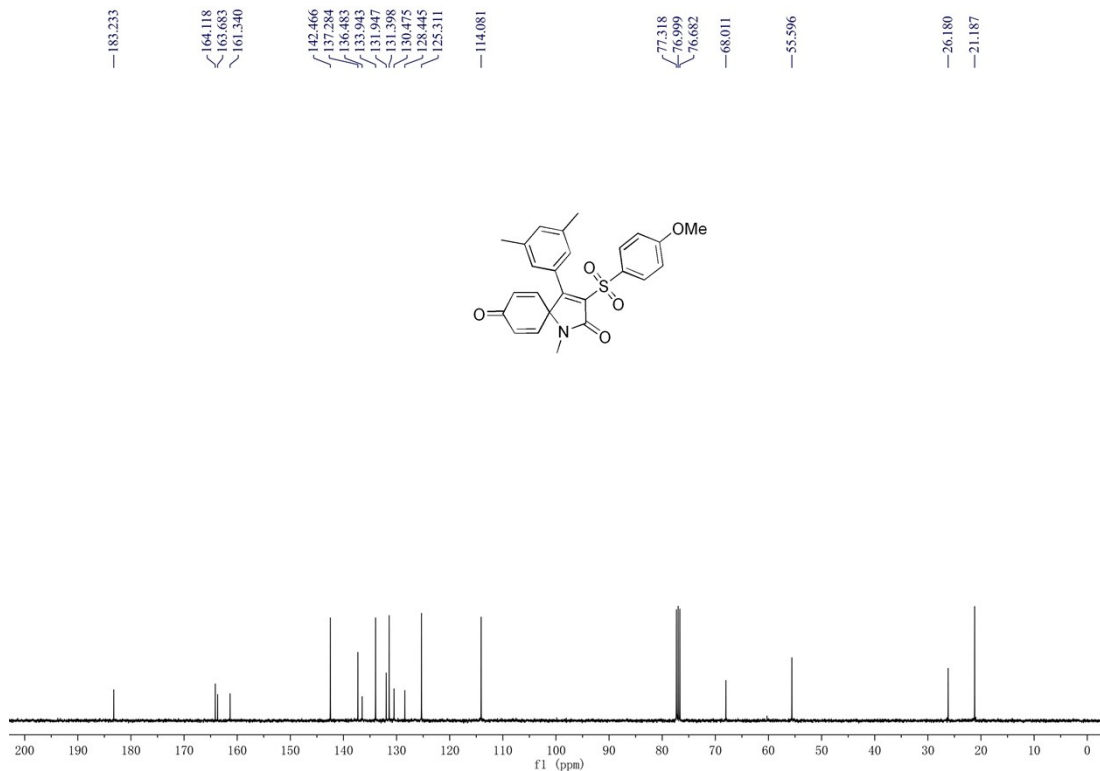

**3-((4-Methoxyphenyl)sulfonyl)-1-methyl-4-(*p*-tolyl)-1-azaspiro[4.5]deca-3,6,9-triene-2,8-dione (30a)**

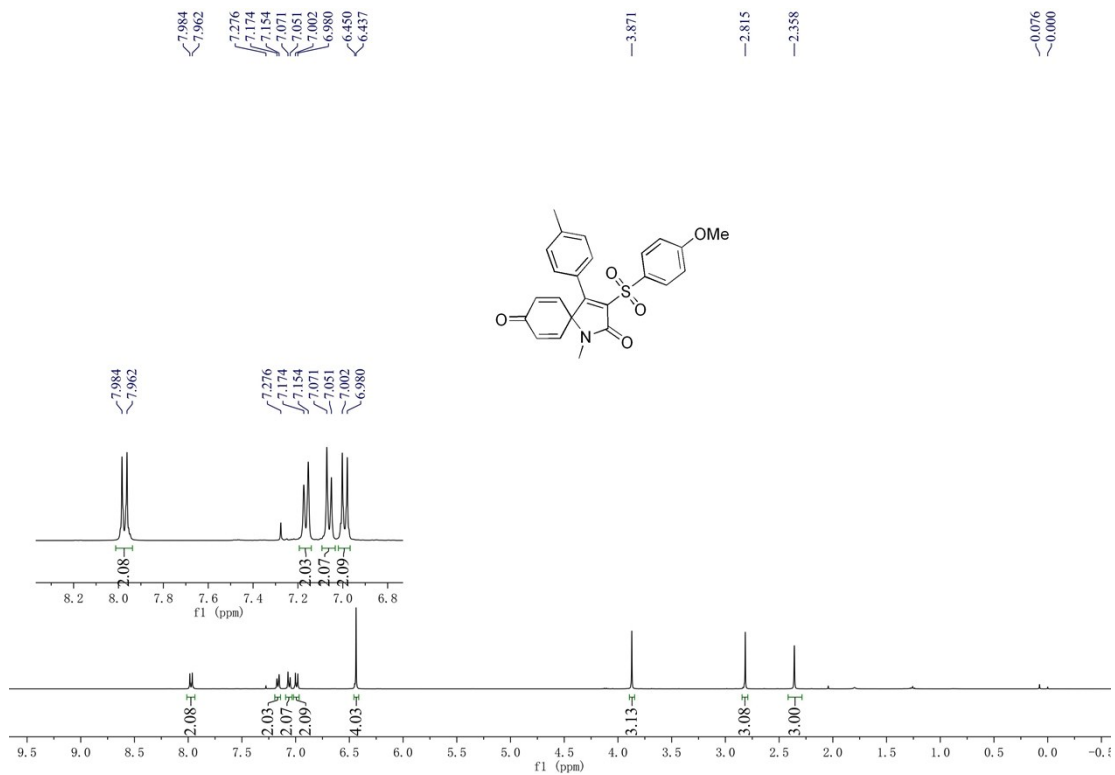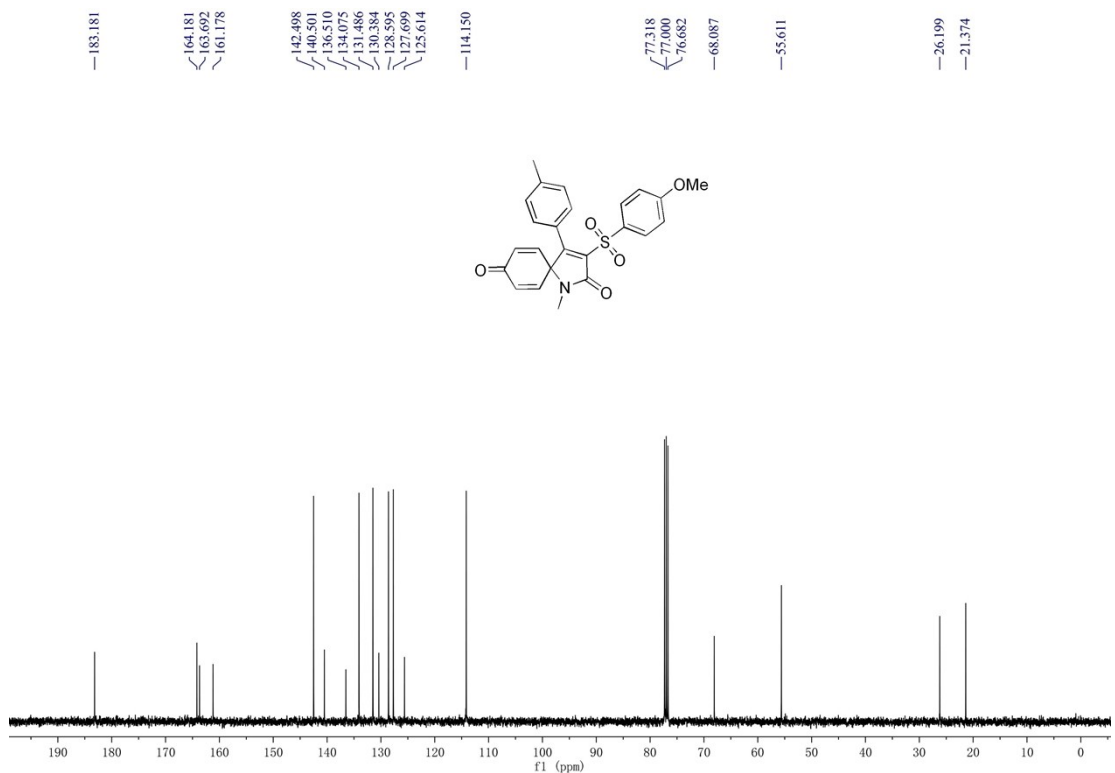



4-(4-(*tert*-Butyl)phenyl)-3-((4-methoxyphenyl)sulfonyl)-1-methyl-1-azaspiro[4.5]deca-3,6,9-triene-2,8-dione

(3pa)

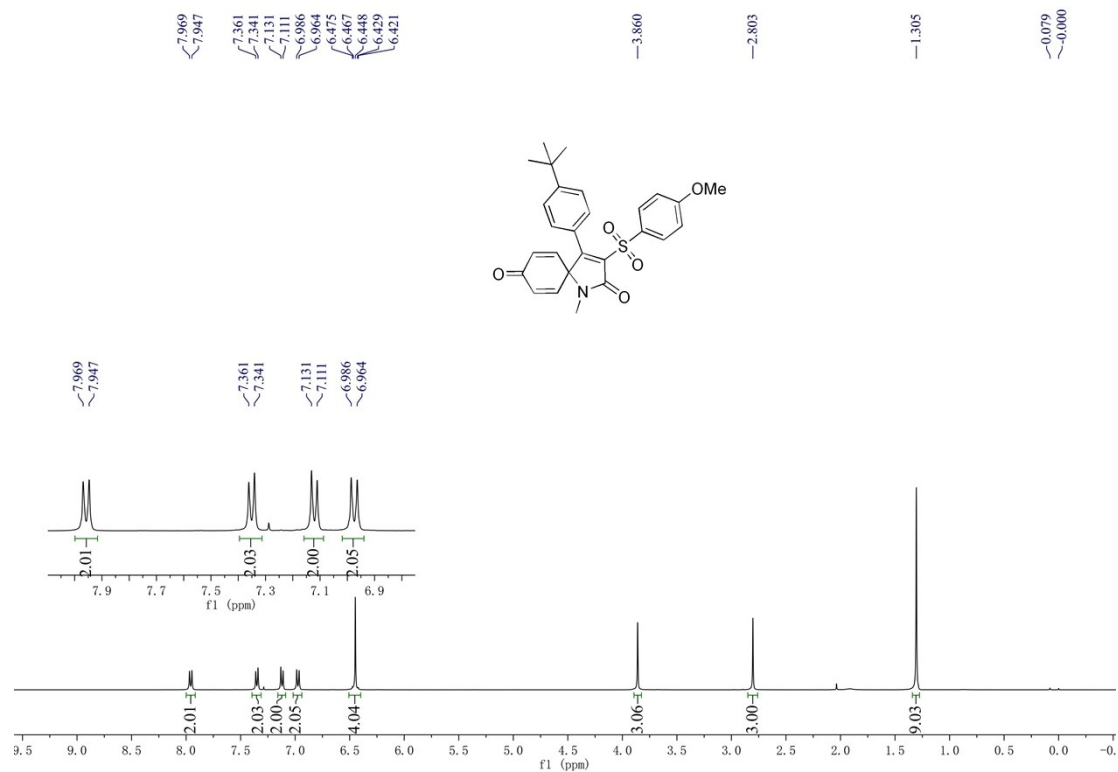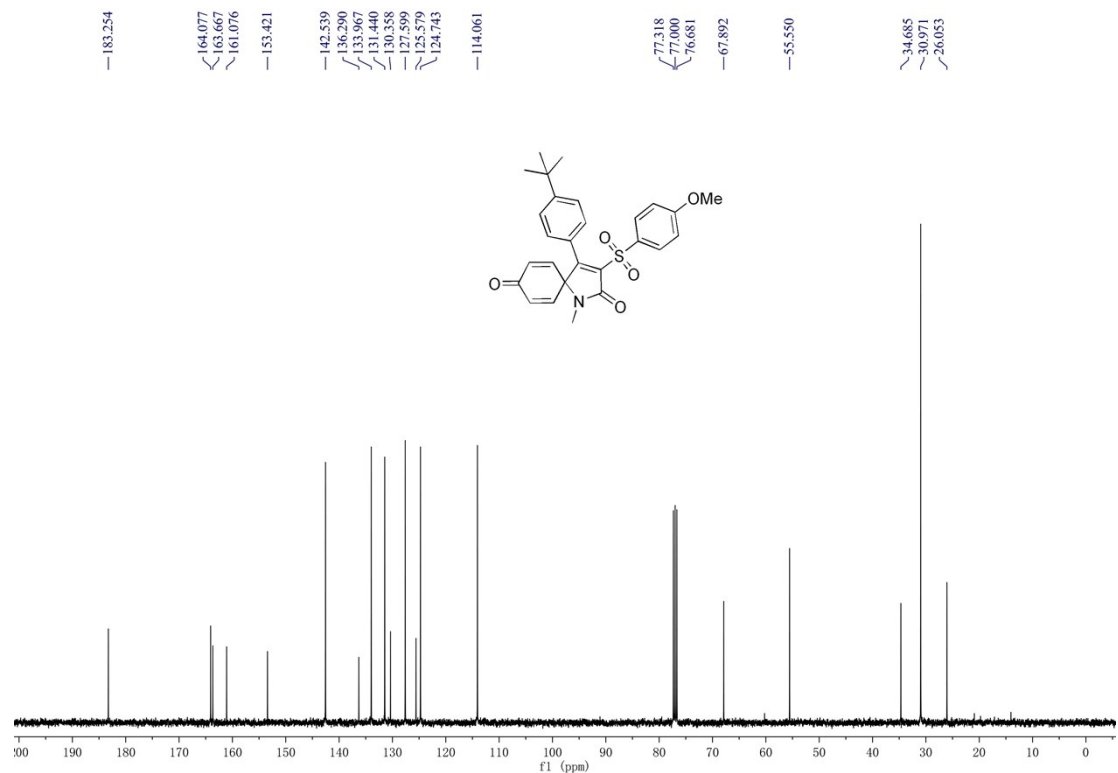

4-(4-Methoxyphenyl)-3-((4-methoxyphenyl)sulfonyl)-1-methyl-1-azaspiro[4.5]deca-3,6,9-triene-2,8-dione

(3qa)

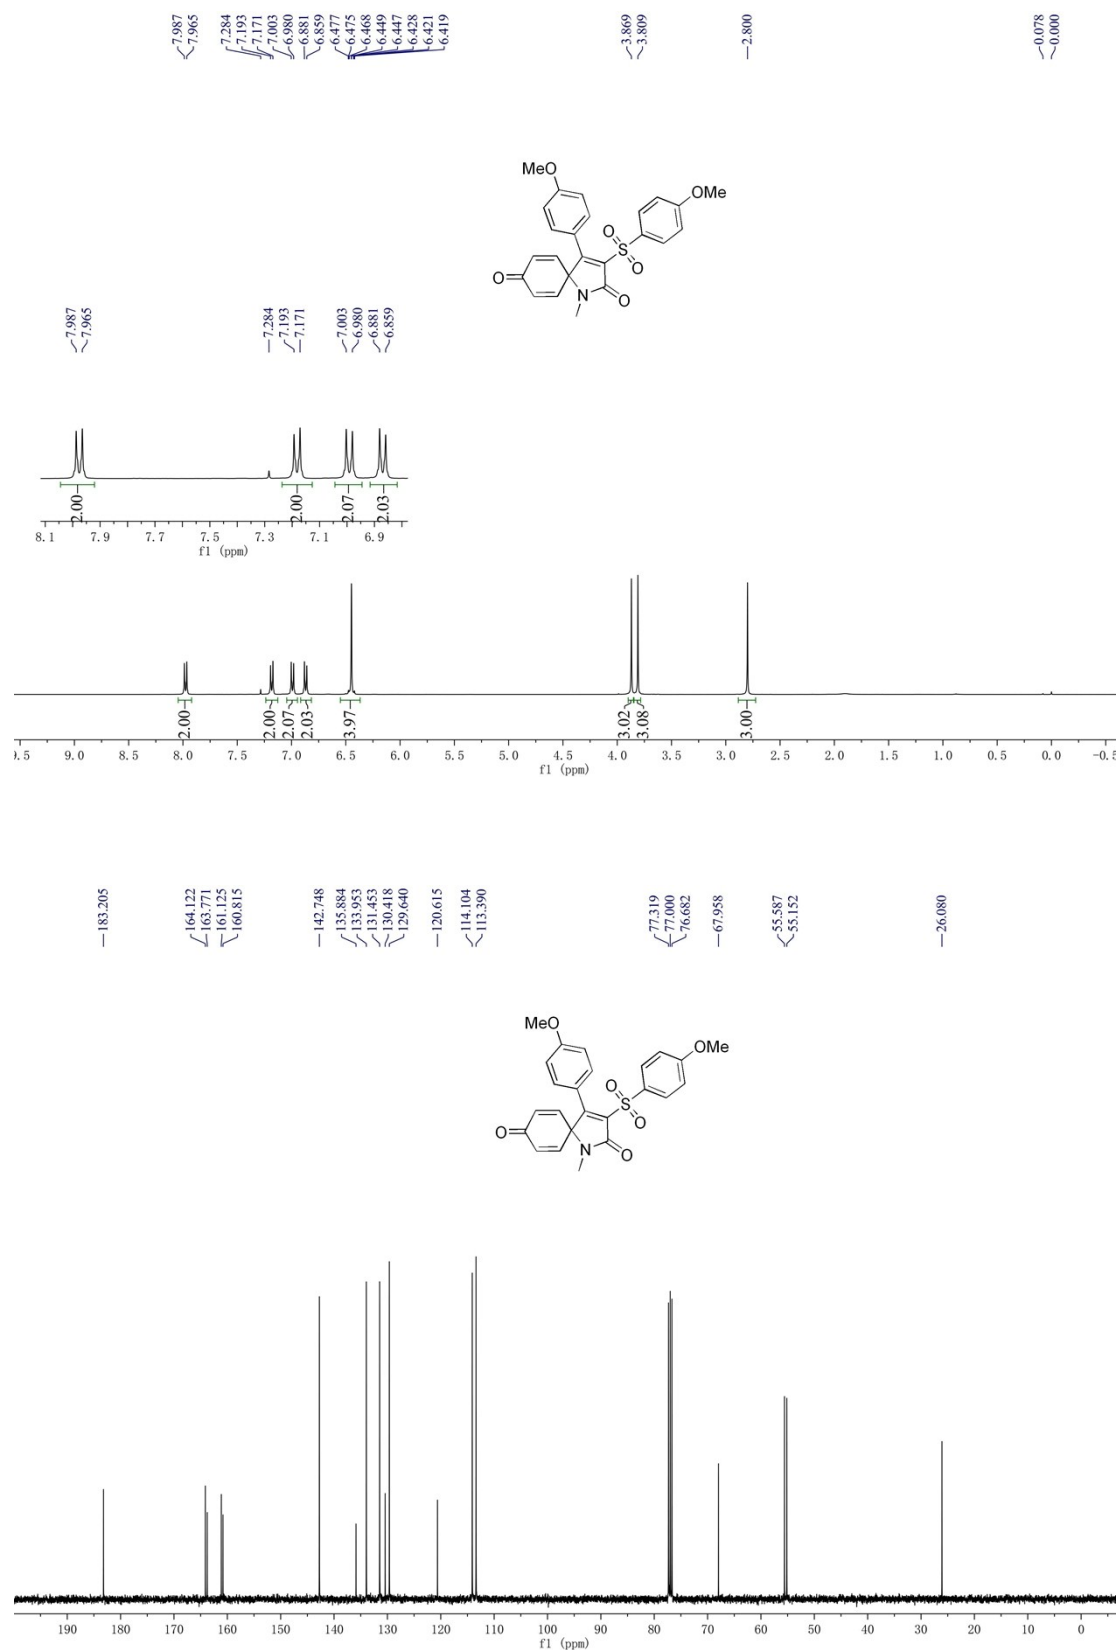

**4-(4-Fluorophenyl)-3-((4-methoxyphenyl)sulfonyl)-1-methyl-1-azaspiro[4.5]deca-3,6,9-triene-2,8-dione (3ra)**

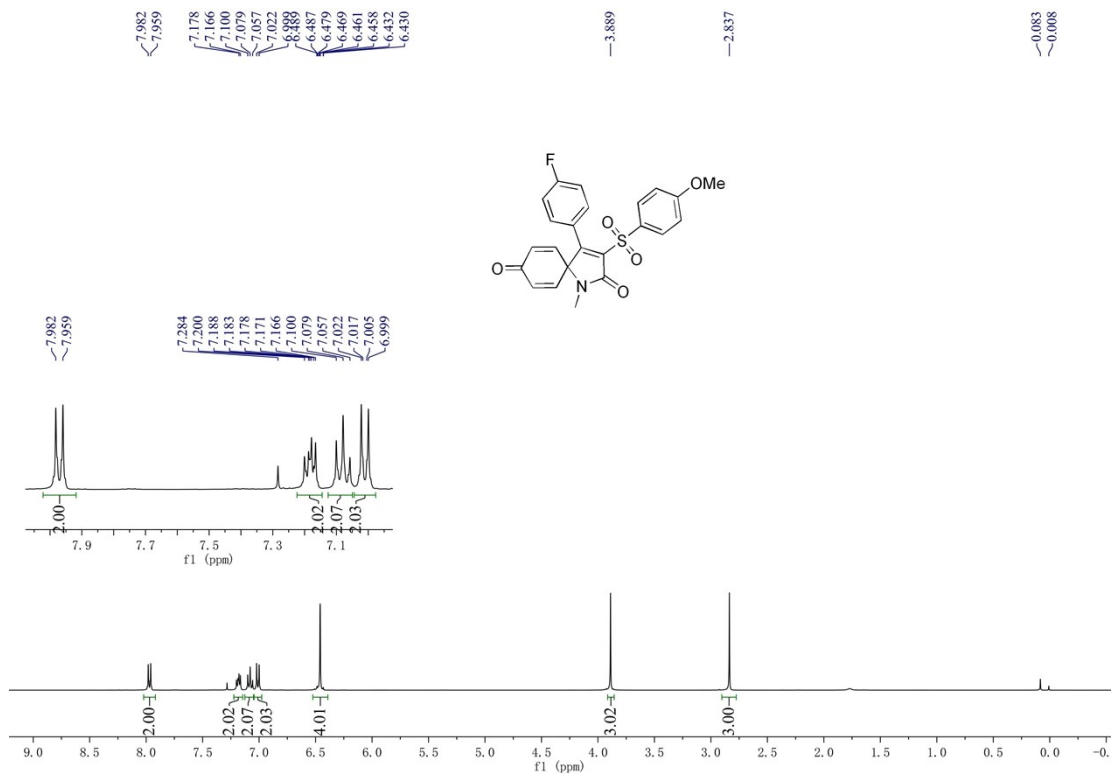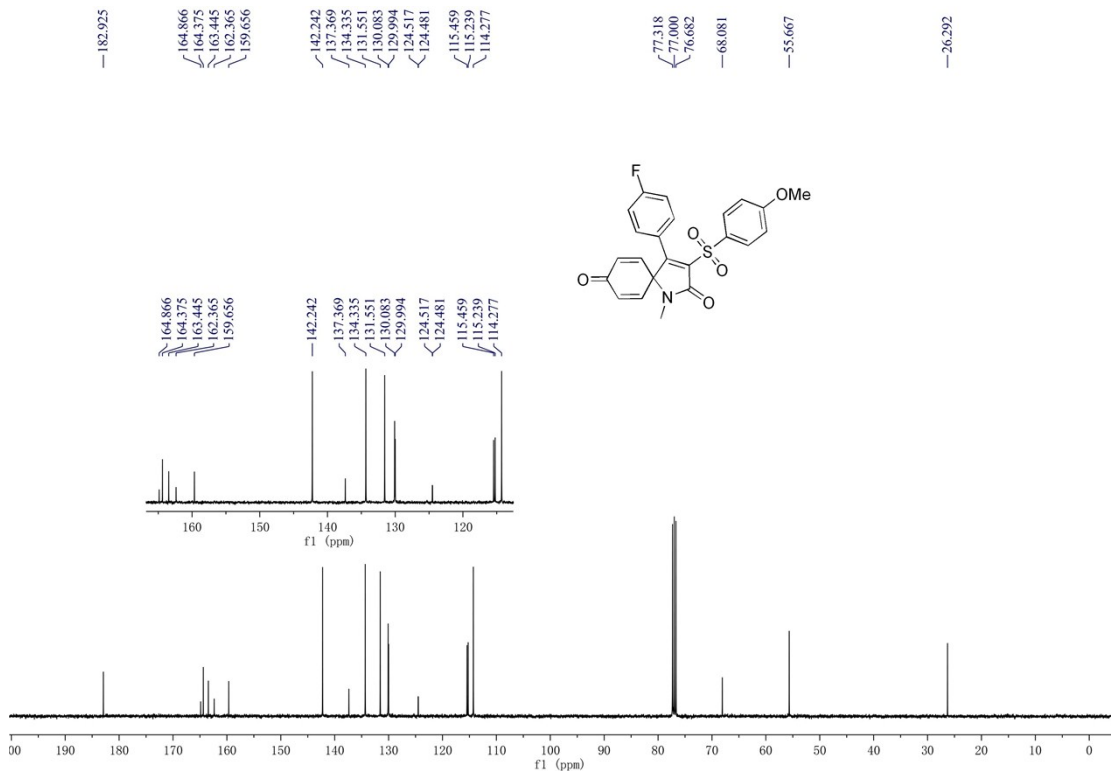

-109.249

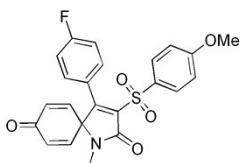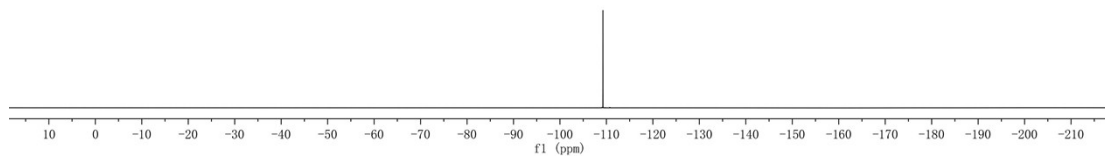

**4-(4-Chlorophenyl)-3-((4-methoxyphenyl)sulfonyl)-1-methyl-1-azaspiro[4.5]deca-3,6,9-triene-2,8-dione (3sa)**

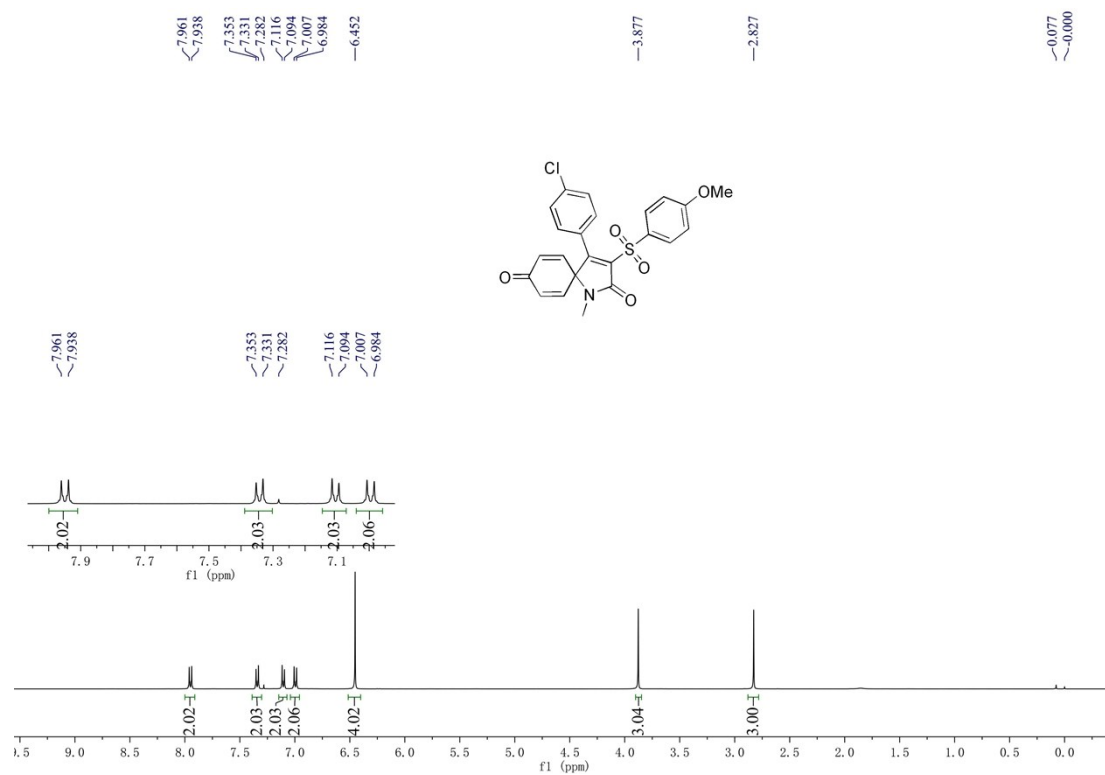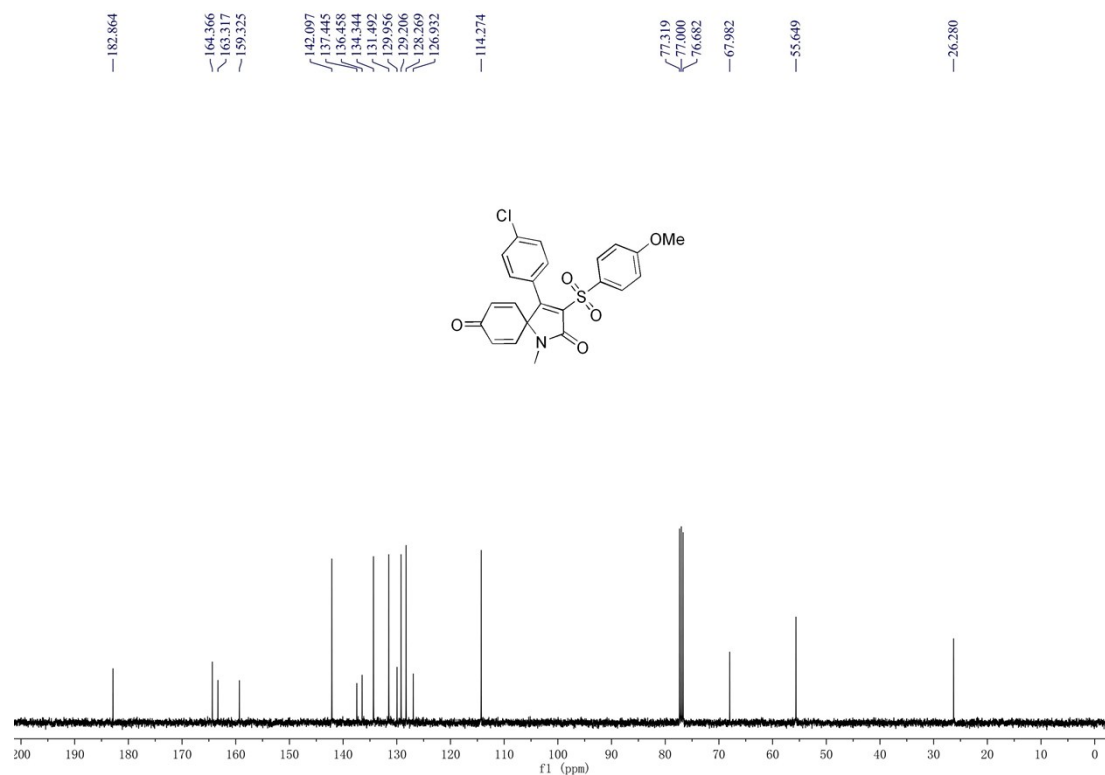

**3-((4-Methoxyphenyl)sulfonyl)-1-methyl-4-(4-(trifluoromethyl)phenyl)-1-azaspiro[4.5]deca-3,6,9-triene-2,8-dione (3ta)**

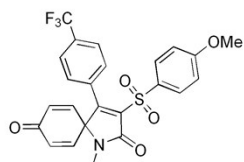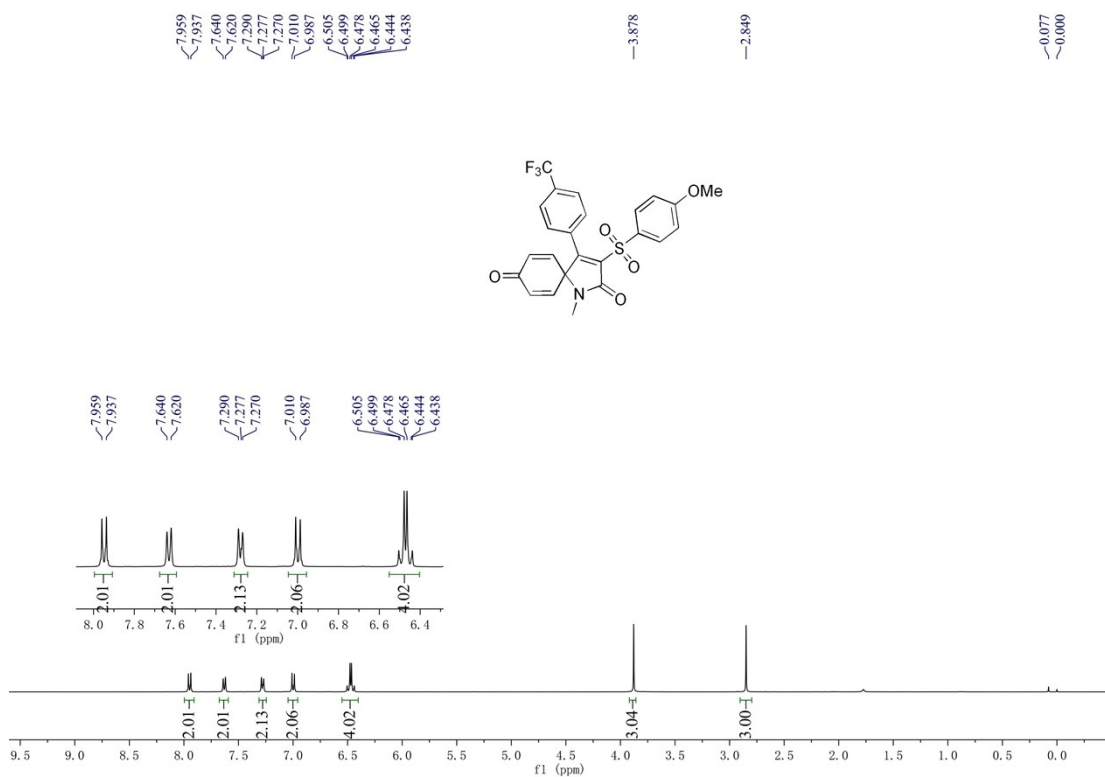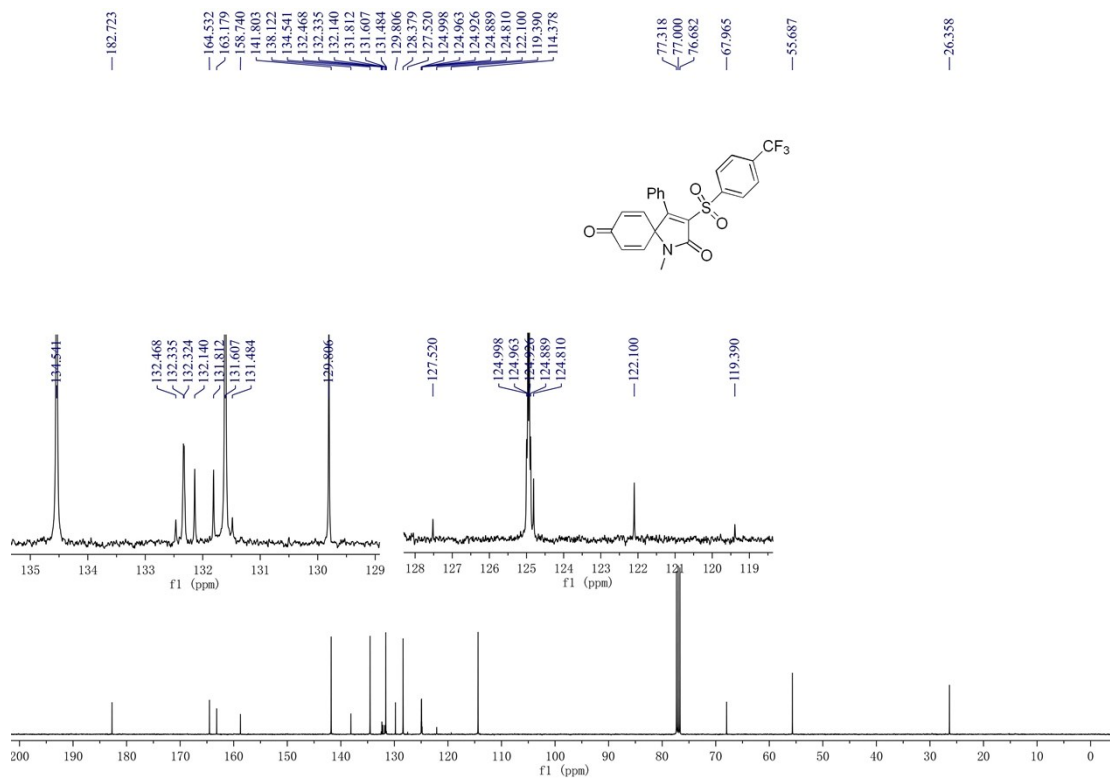

-62.898

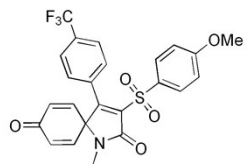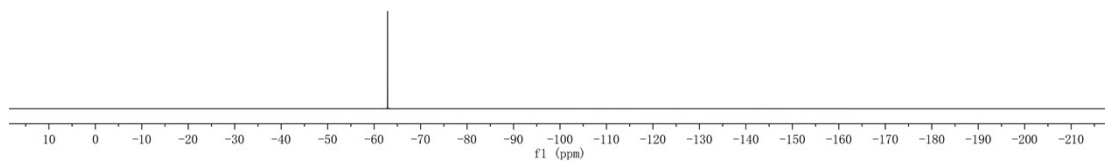

4-(4-Acetylphenyl)-3-((4-methoxyphenyl)sulfonyl)-1-methyl-1-azaspiro[4.5]deca-3,6,9-triene-2,8-dione (3ua)

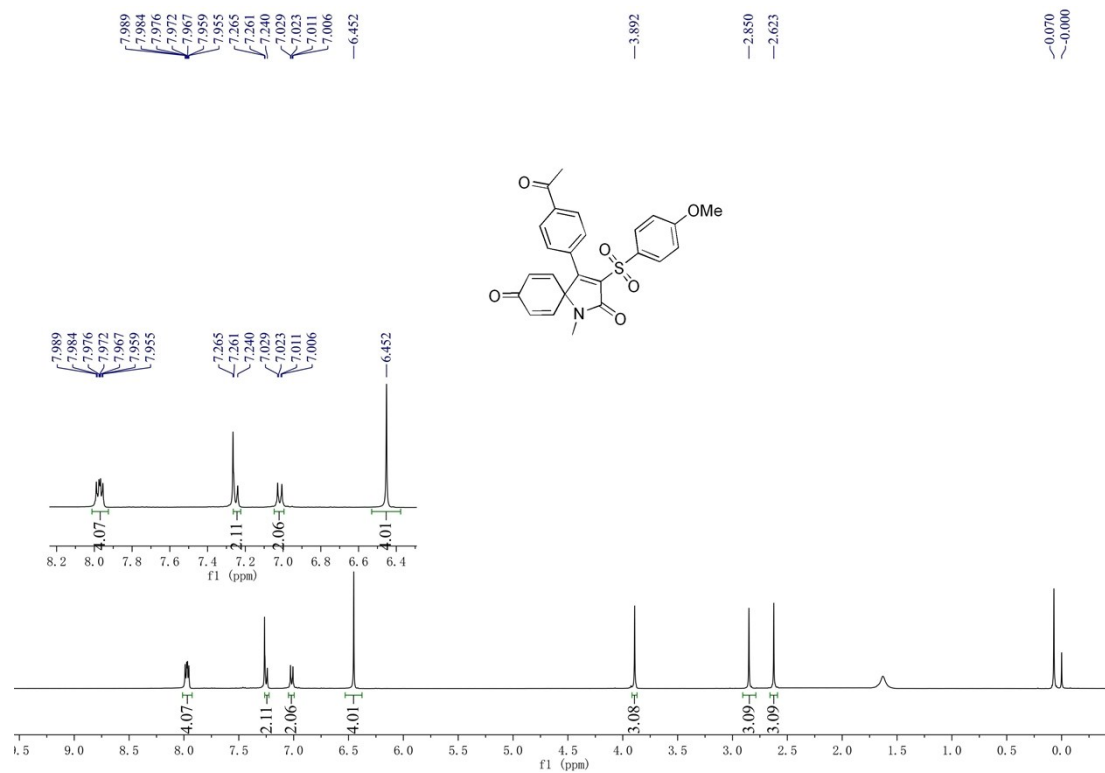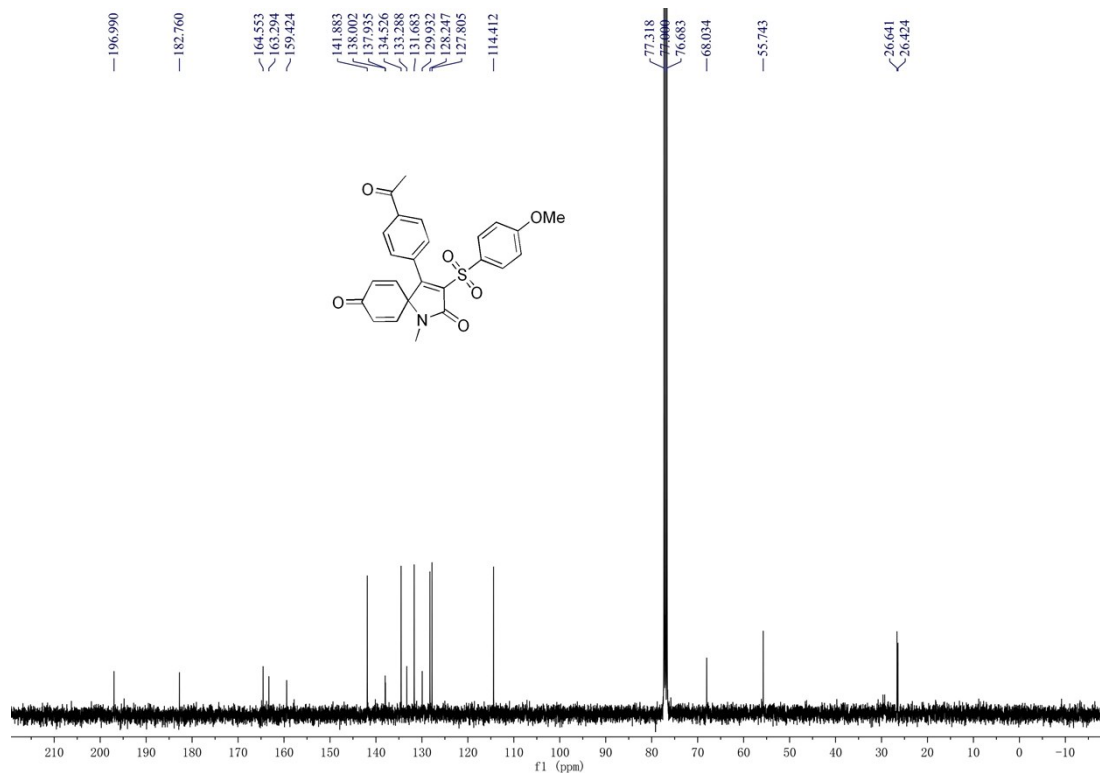



3-((4-Methoxyphenyl)sulfonyl)-1-methyl-4-(naphthalen-1-yl)-1-azaspiro[4.5]deca-3,6,9-triene-2,8-dione (3va)

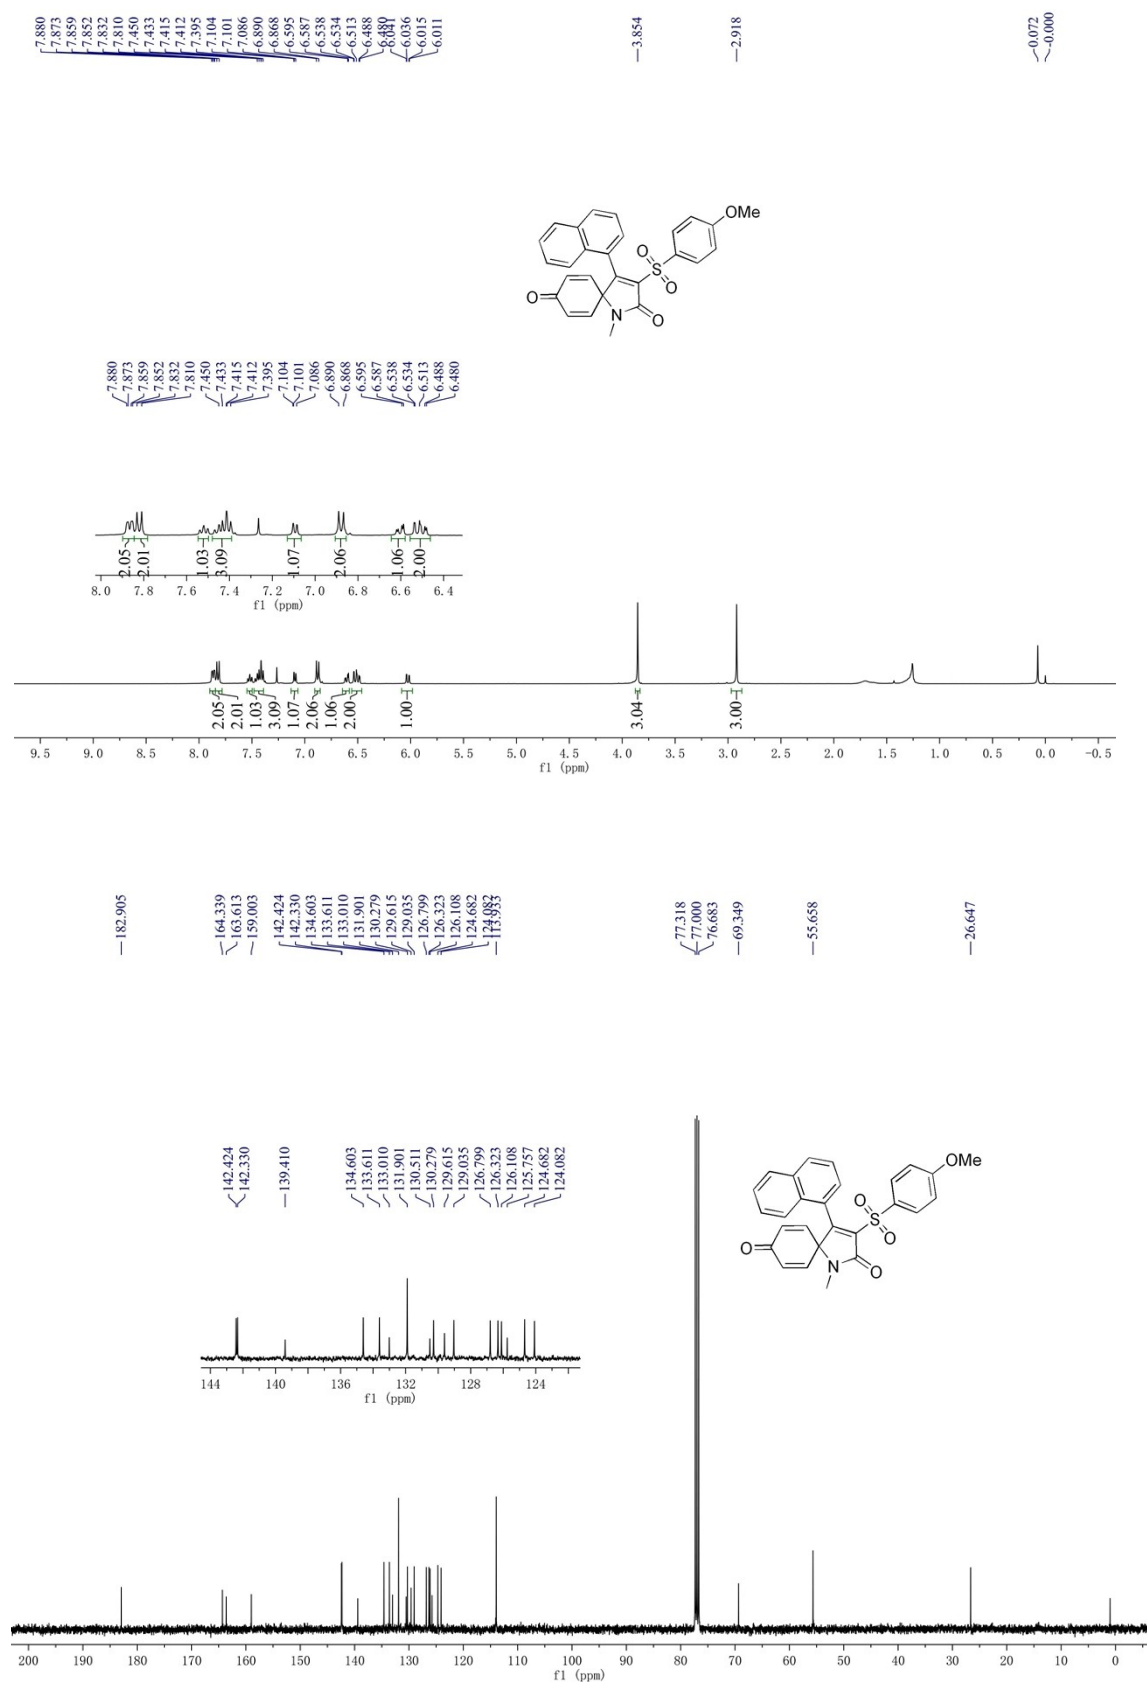

3-((4-Methoxyphenyl)sulfonyl)-1-methyl-4-(thiophen-2-yl)-1-azaspiro[4.5]deca-3,6,9-triene-2,8-dione (3wa)

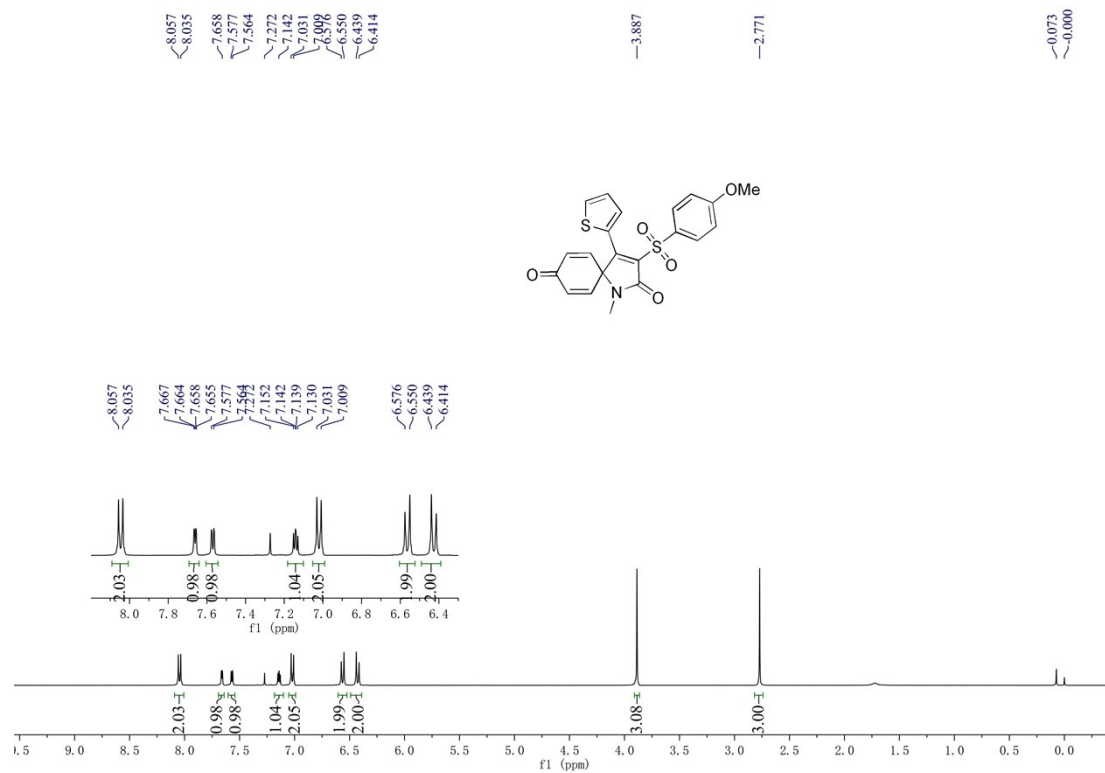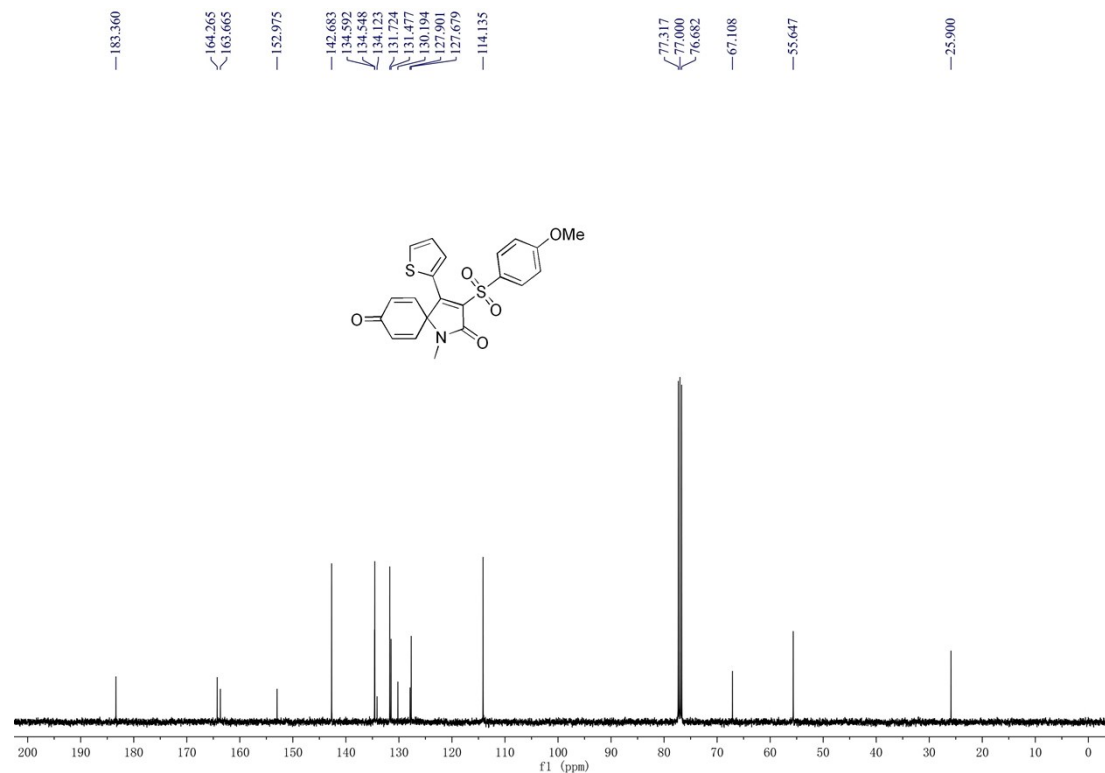

3-((4-Methoxyphenyl)sulfonyl)-1-methyl-4-pentyl-1-azaspiro[4.5]deca-3,6,9-triene-2,8-dione (3xa)

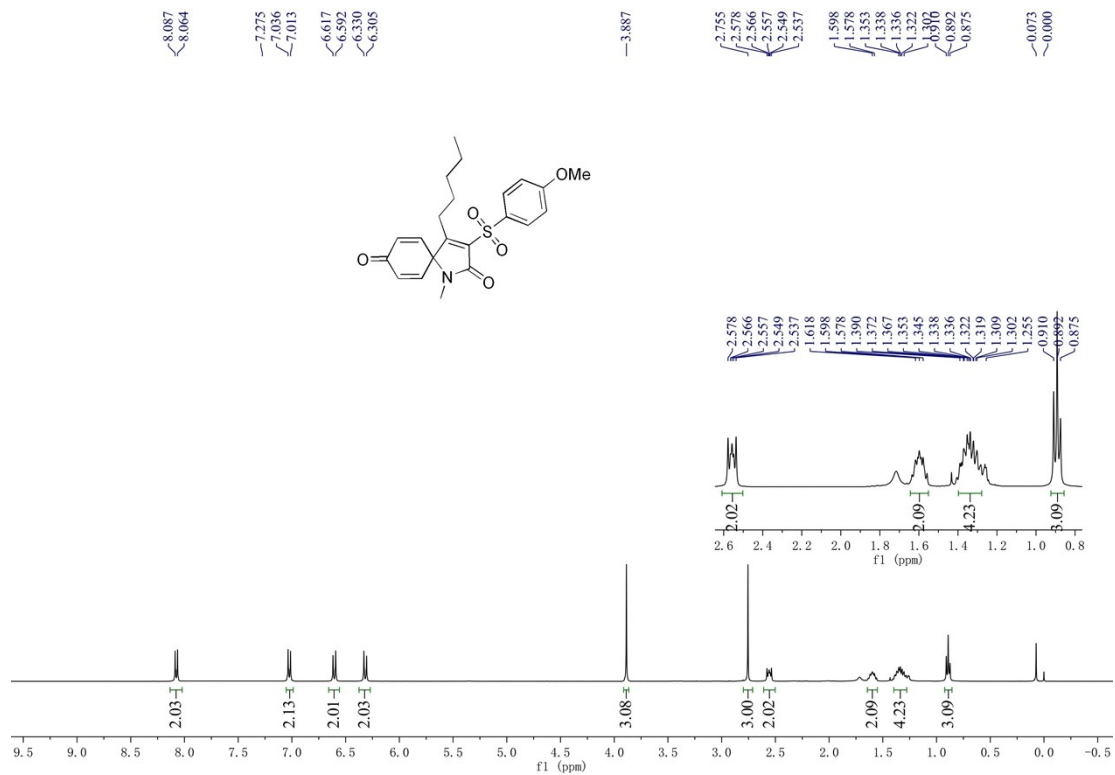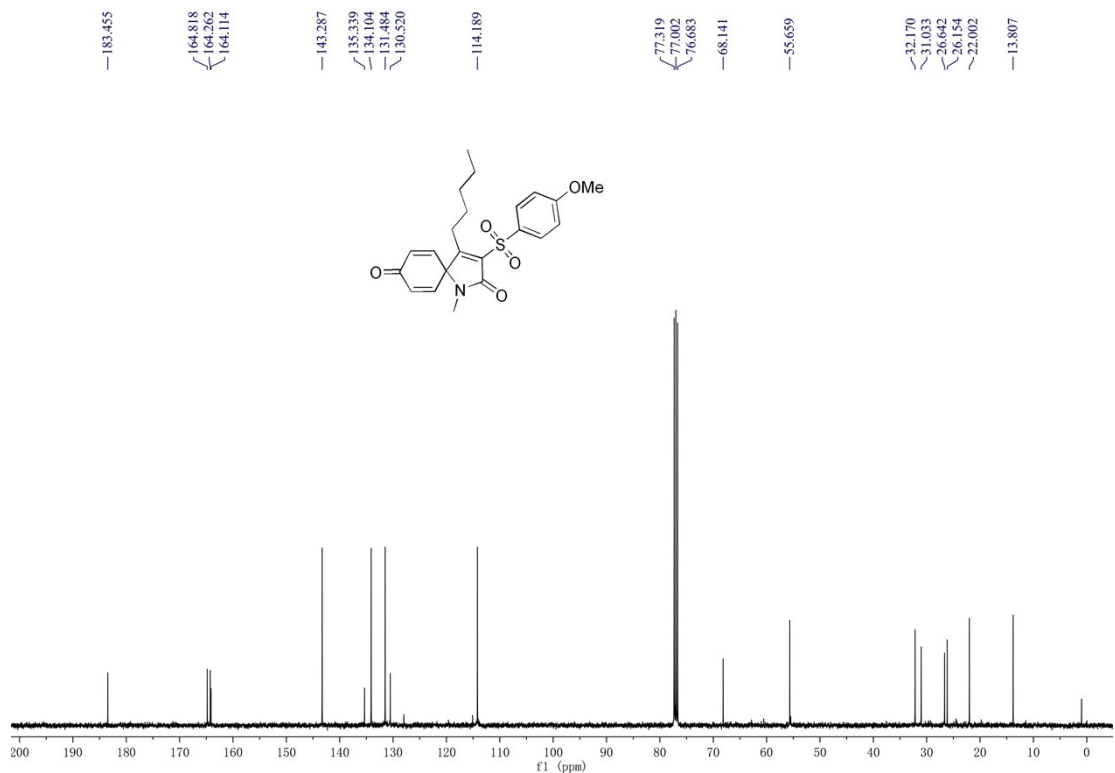

**3-((4-Methoxyphenyl)sulfonyl)-1,4-dimethyl-1-azaspiro[4.5]deca-3,6,9-triene-2,8-dione (3ya)**

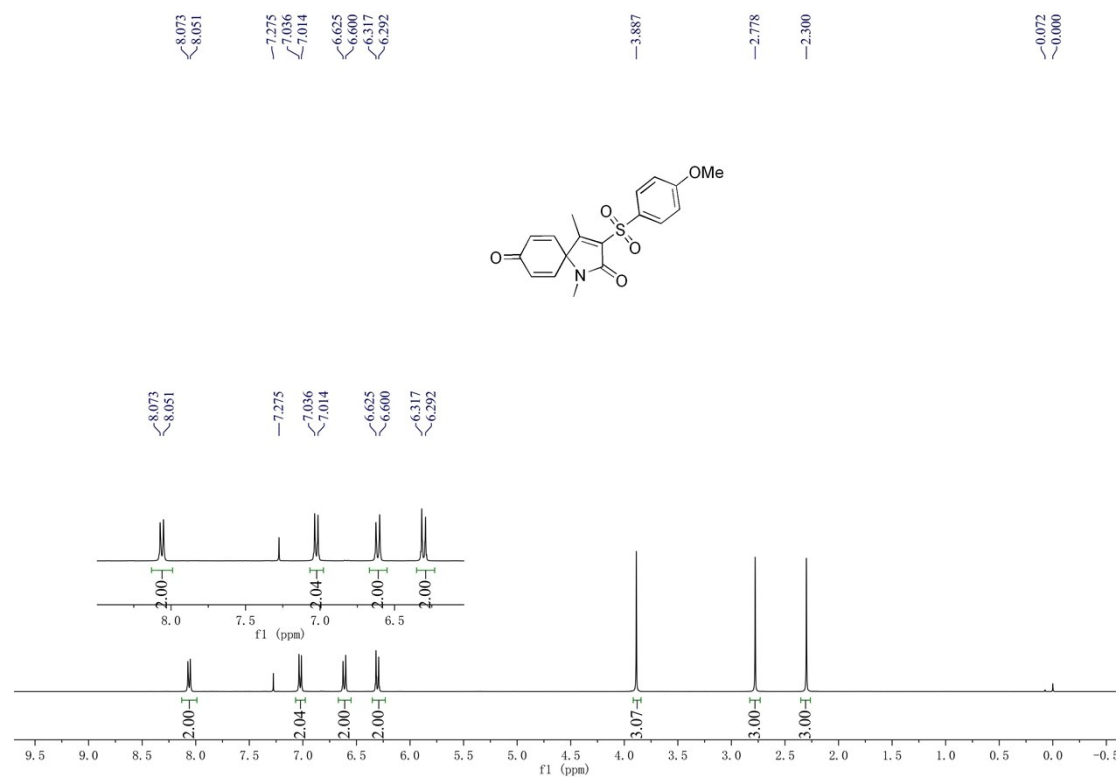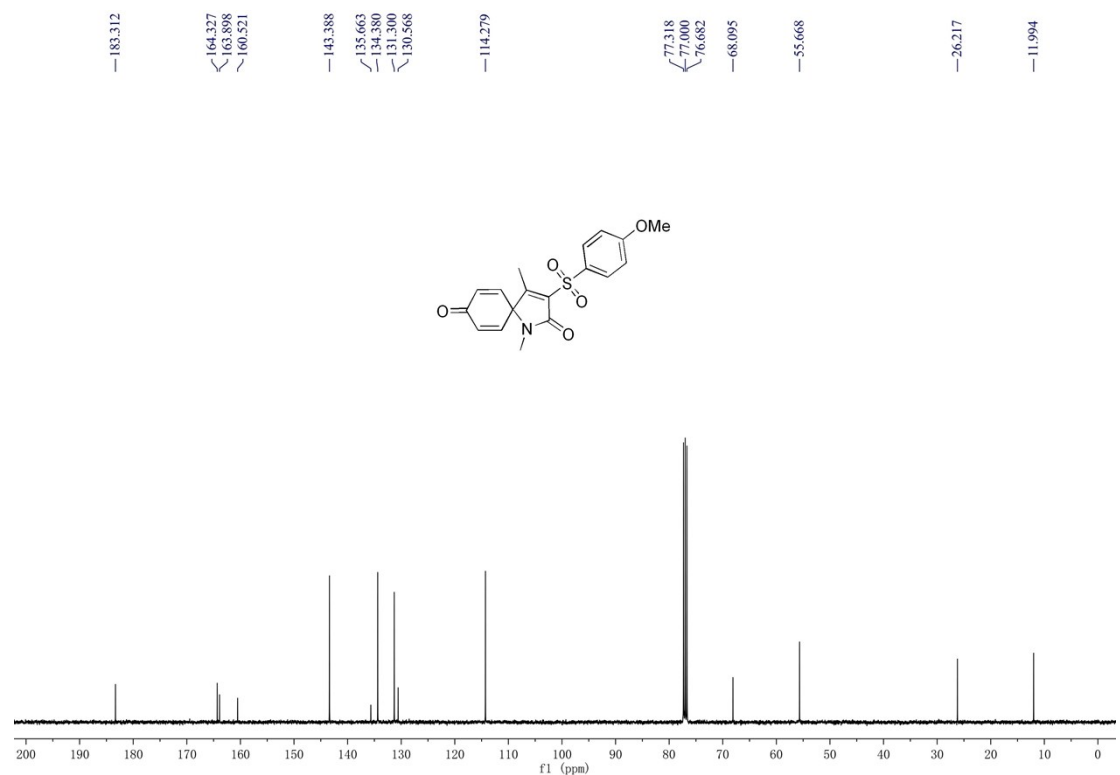

3-((4-Ethoxyphenyl)sulfonyl)-1-methyl-4-phenyl-1-azaspiro[4.5]deca-3,6,9-triene-2,8-dione (3ab)

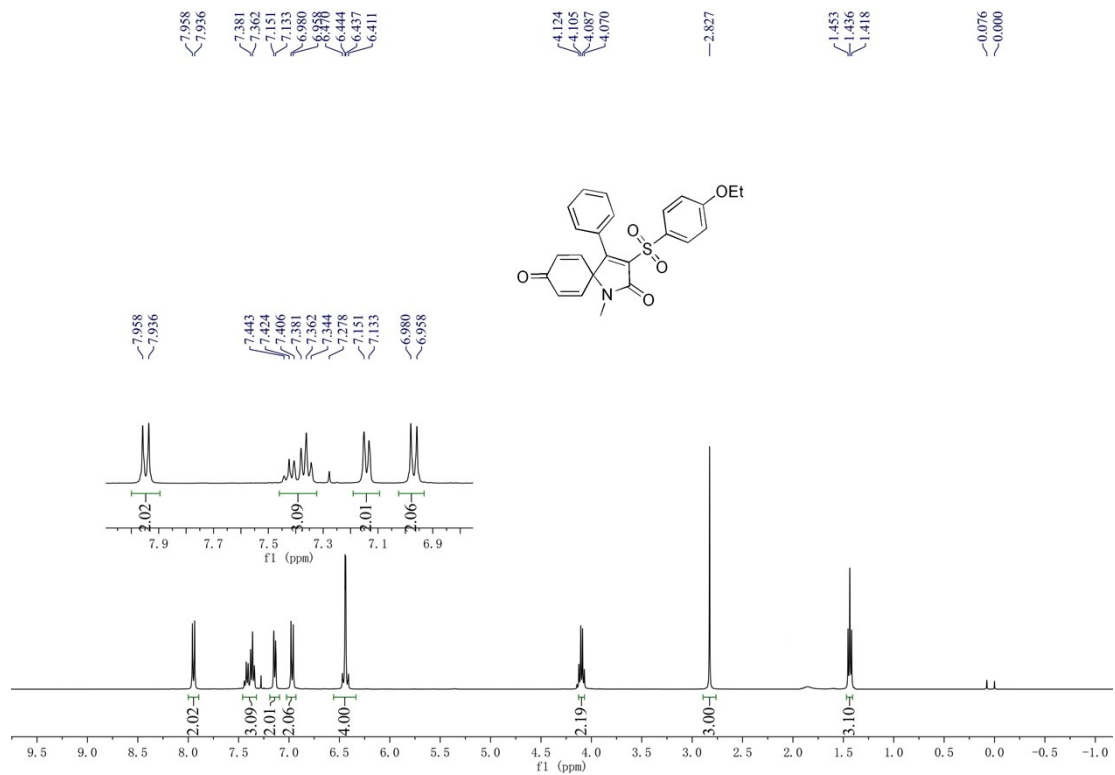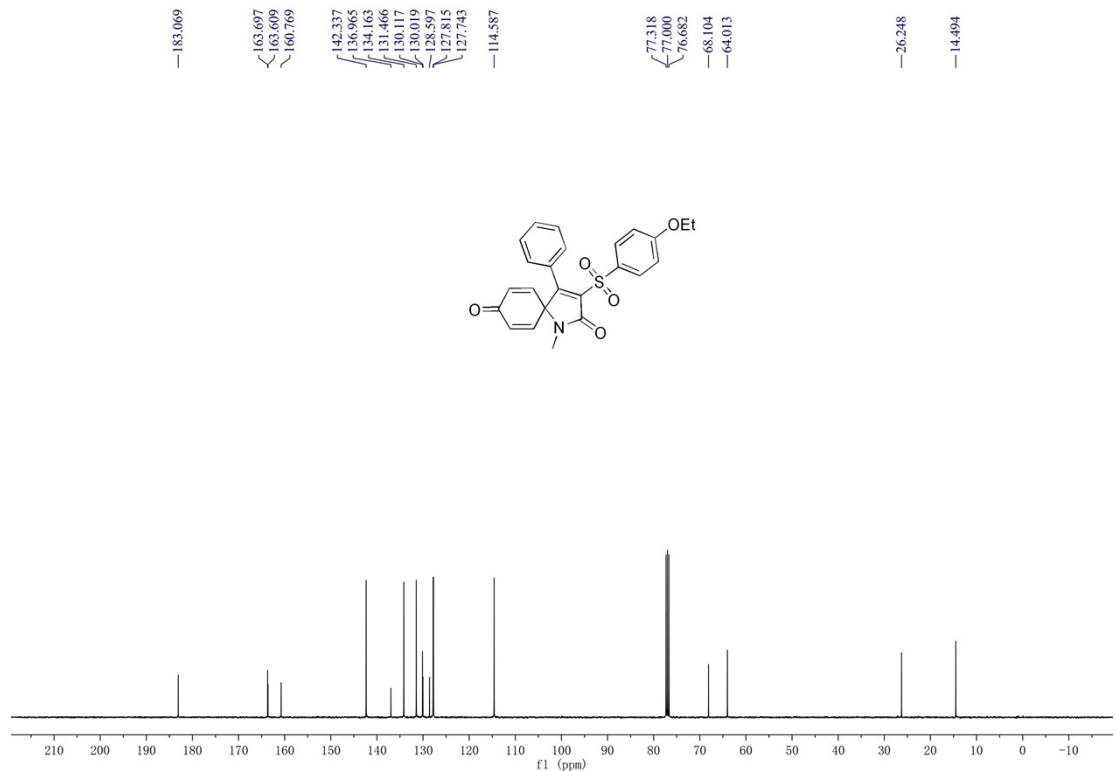

1-Methyl-3-((4-phenoxyphenyl)sulfonyl)-4-phenyl-1-azaspiro[4.5]deca-3,6,9-triene-2,8-dione (3ac)

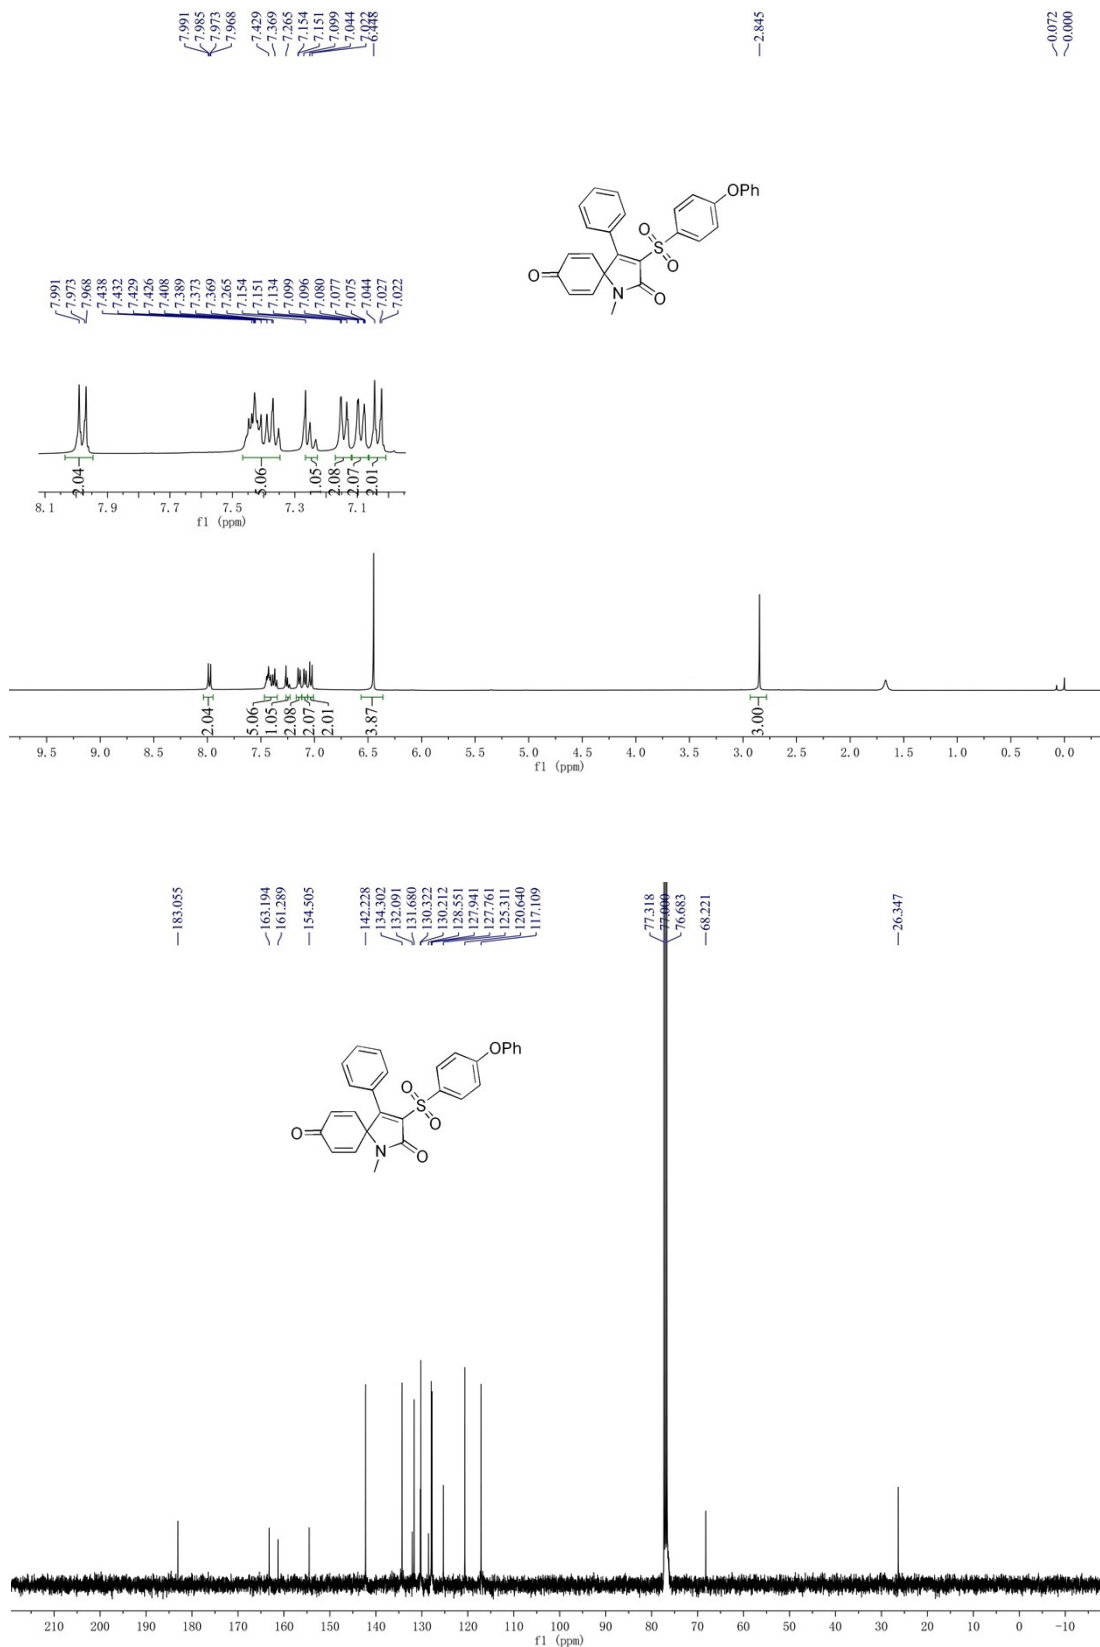

1-Methyl-4-phenyl-3-tosyl-1-azaspiro[4.5]deca-3,6,9-triene-2,8-dione (3ad)

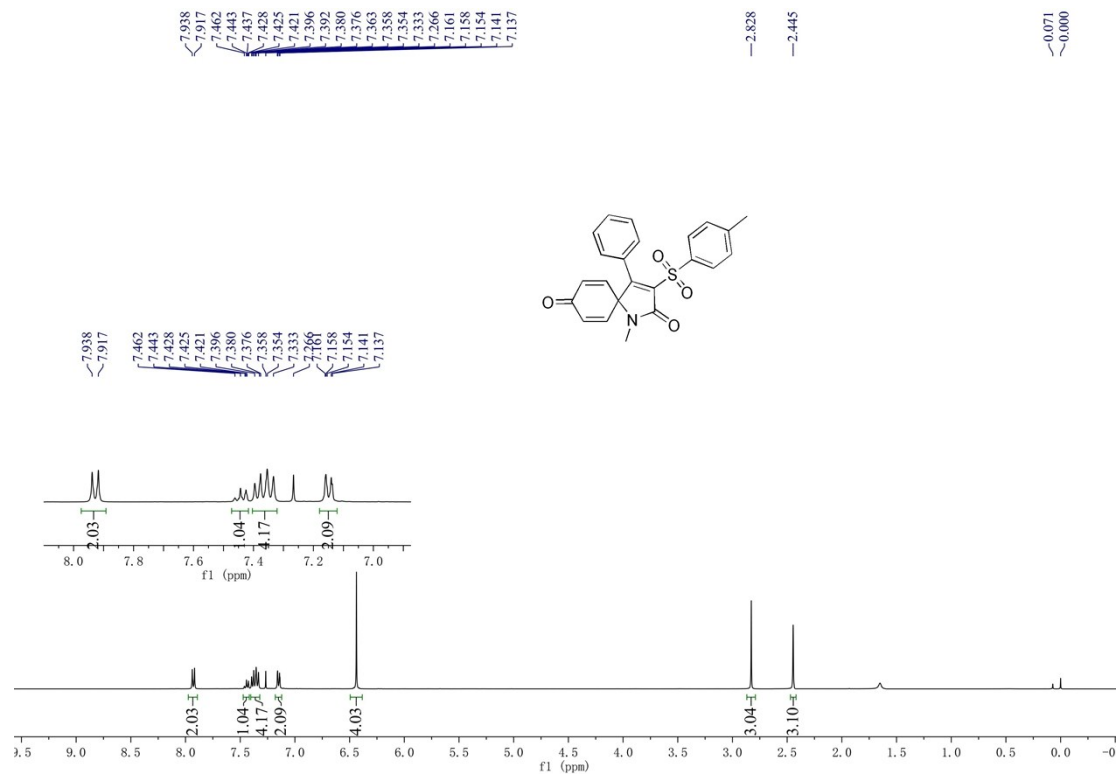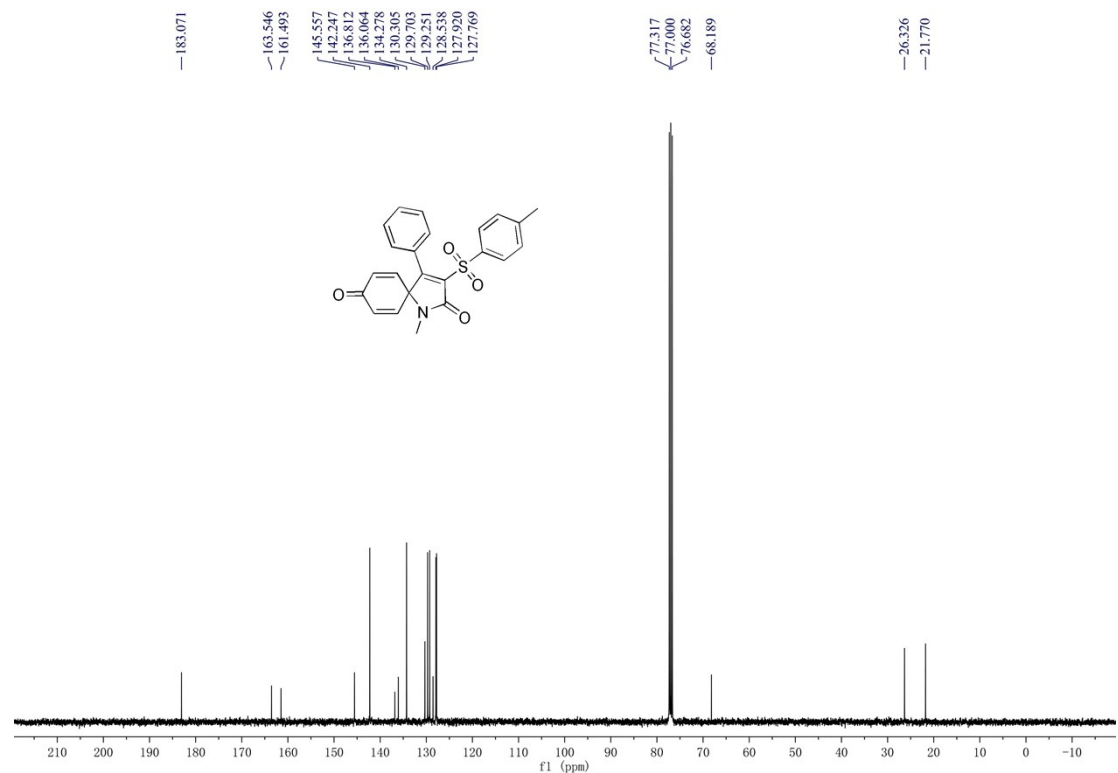

3-((4-*tert*-Butyl)phenyl)sulfonyl)-1-methyl-4-phenyl-1-azaspiro[4.5]deca-3,6,9-triene-2,8-dione (3ae)

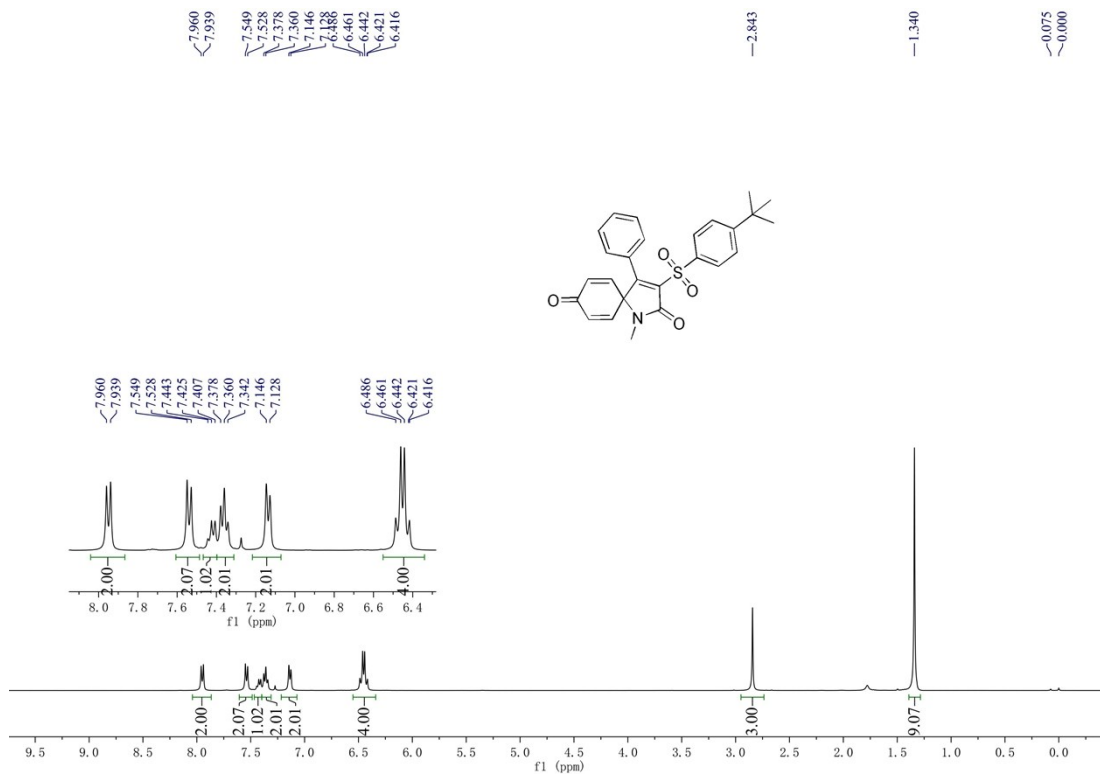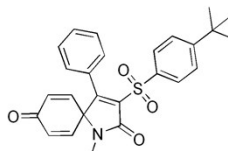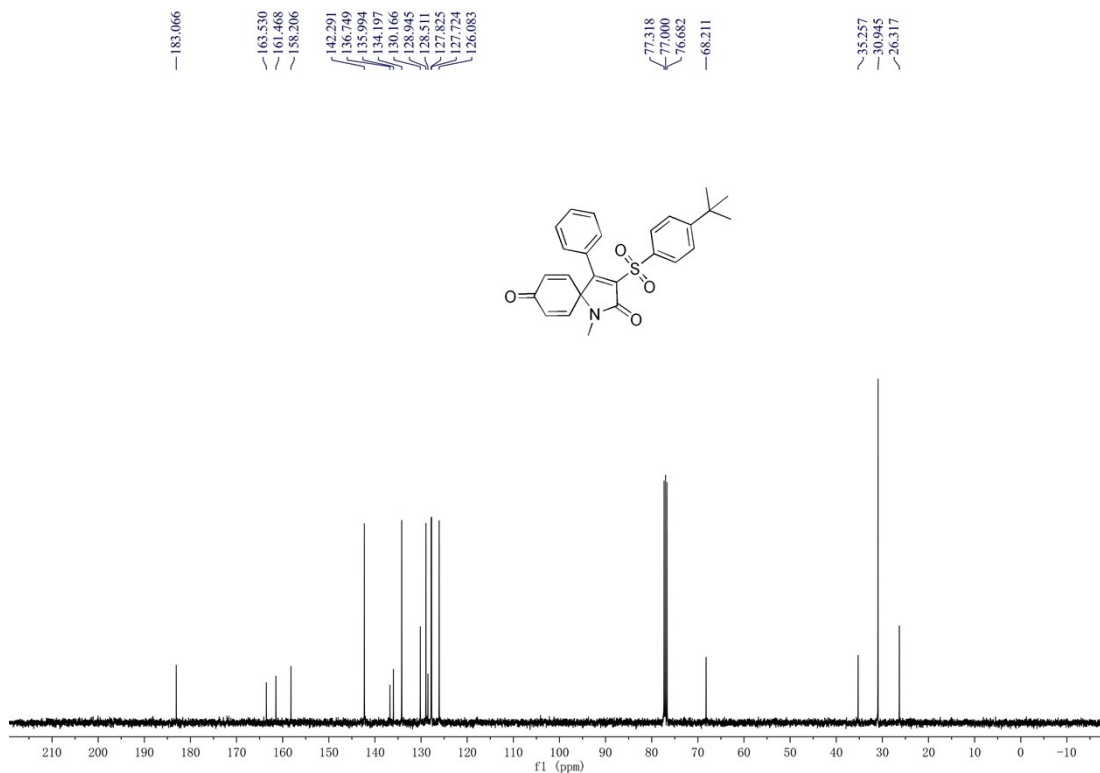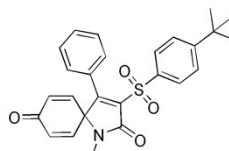



**1-Methyl-4-phenyl-3-(phenylsulfonyl)-1-azaspiro[4.5]deca-3,6,9-triene-2,8-dione (3af)**

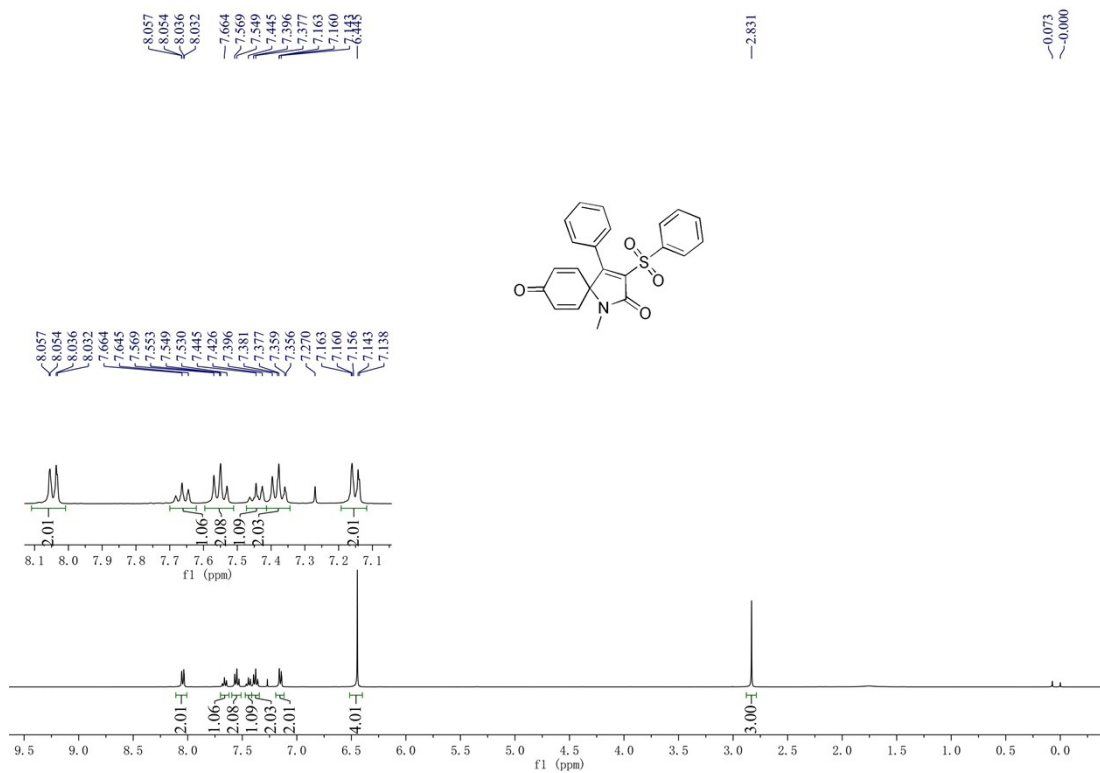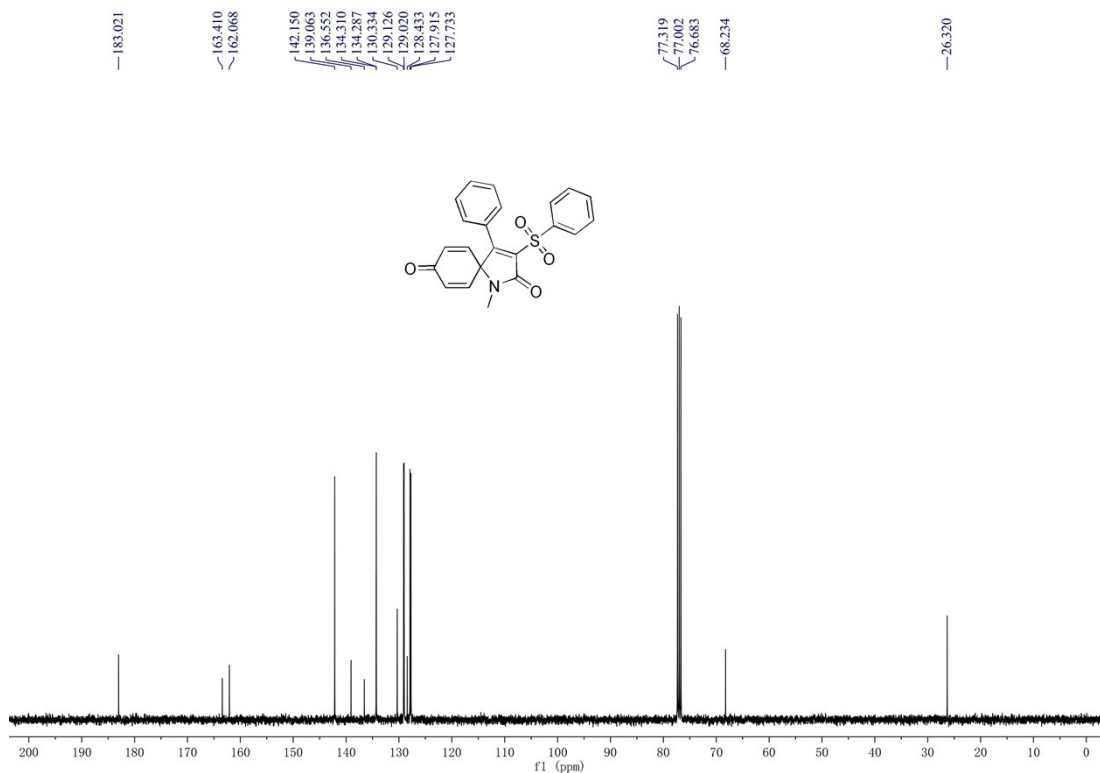

3-((4-Fluorophenyl)sulfonyl)-1-methyl-4-phenyl-1-azaspiro[4.5]deca-3,6,9-triene-2,8-dione (3ag)

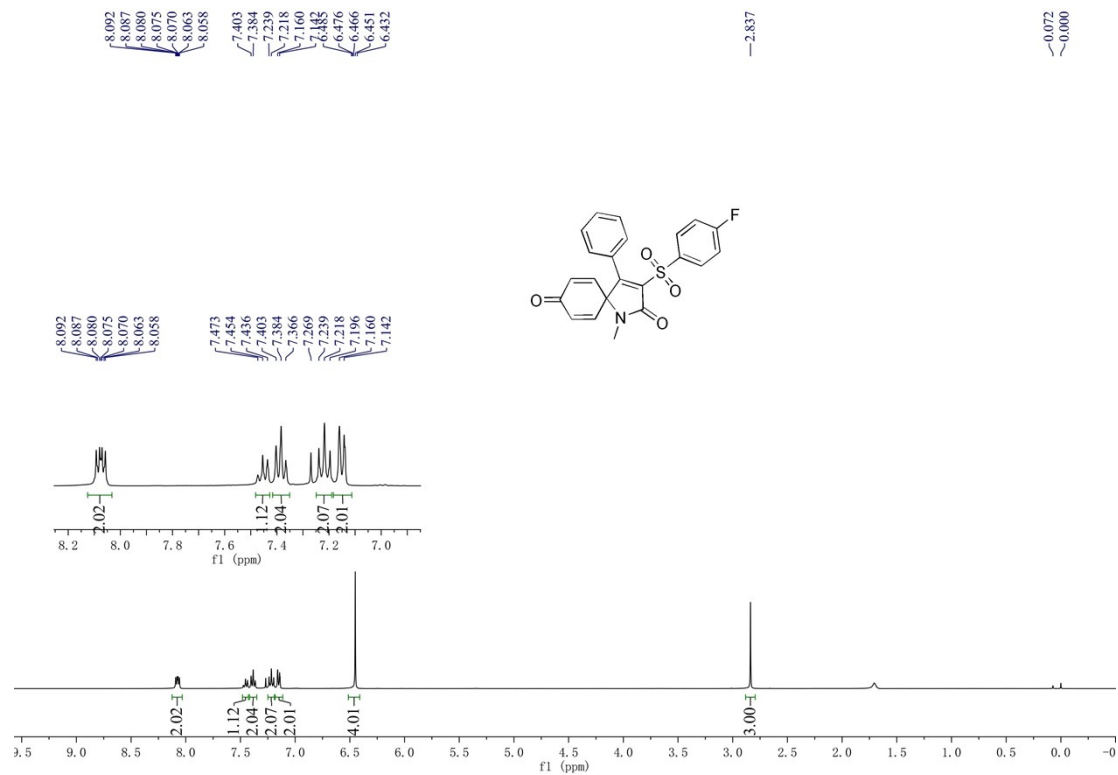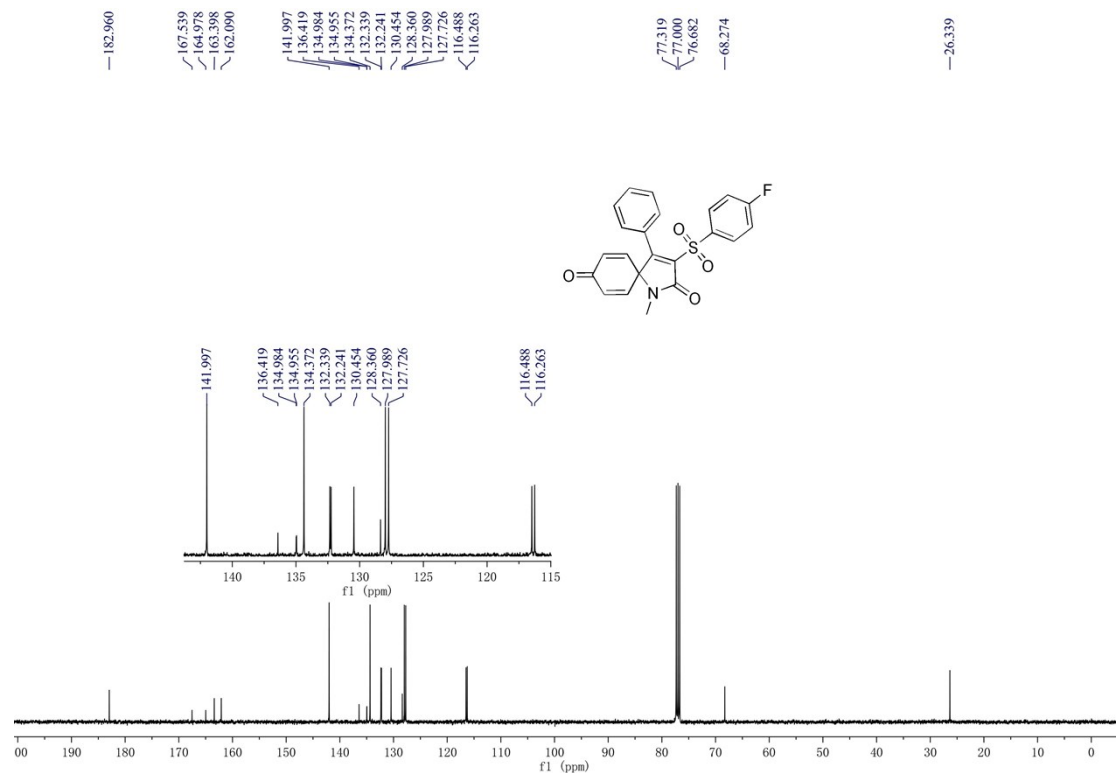

-102.055

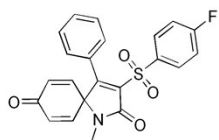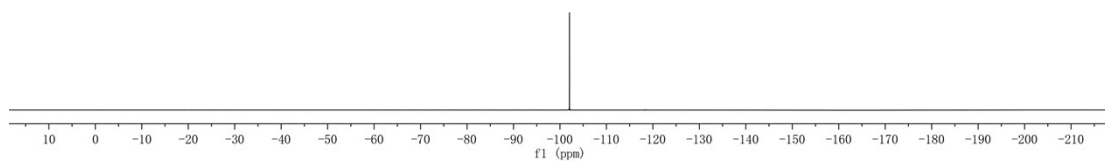

3-((4-Chlorophenyl)sulfonyl)-1-methyl-4-phenyl-1-azaspiro[4.5]deca-3,6,9-triene-2,8-dione (3ah)

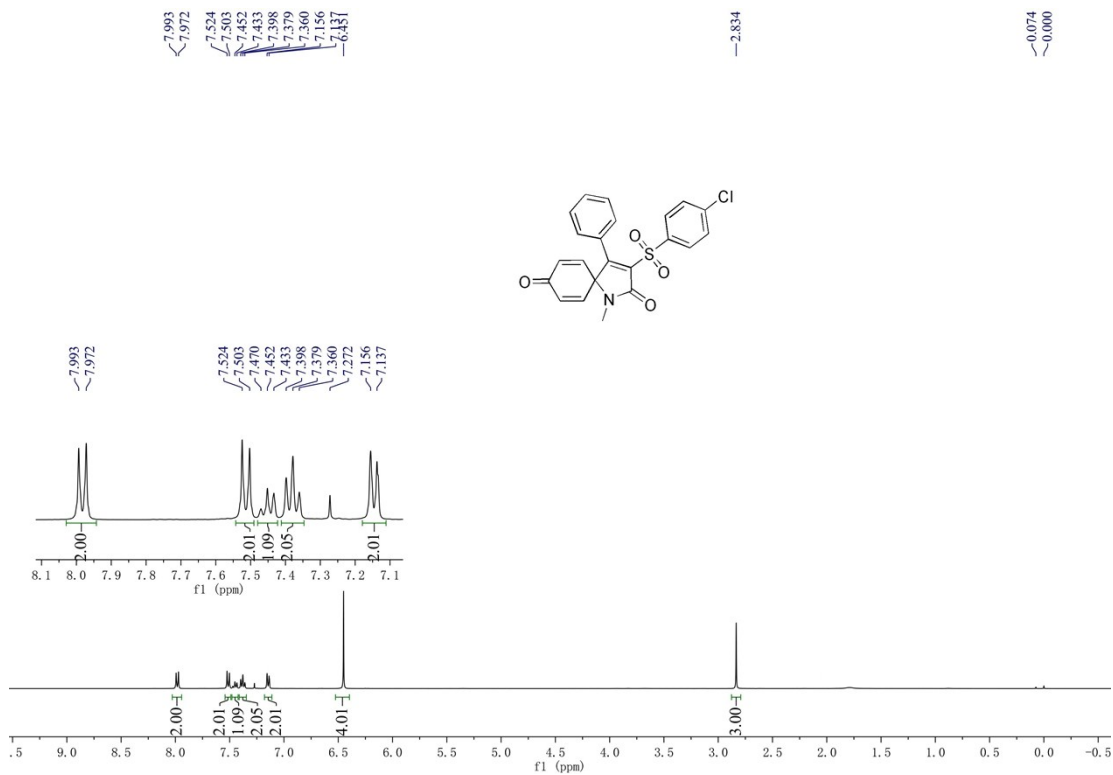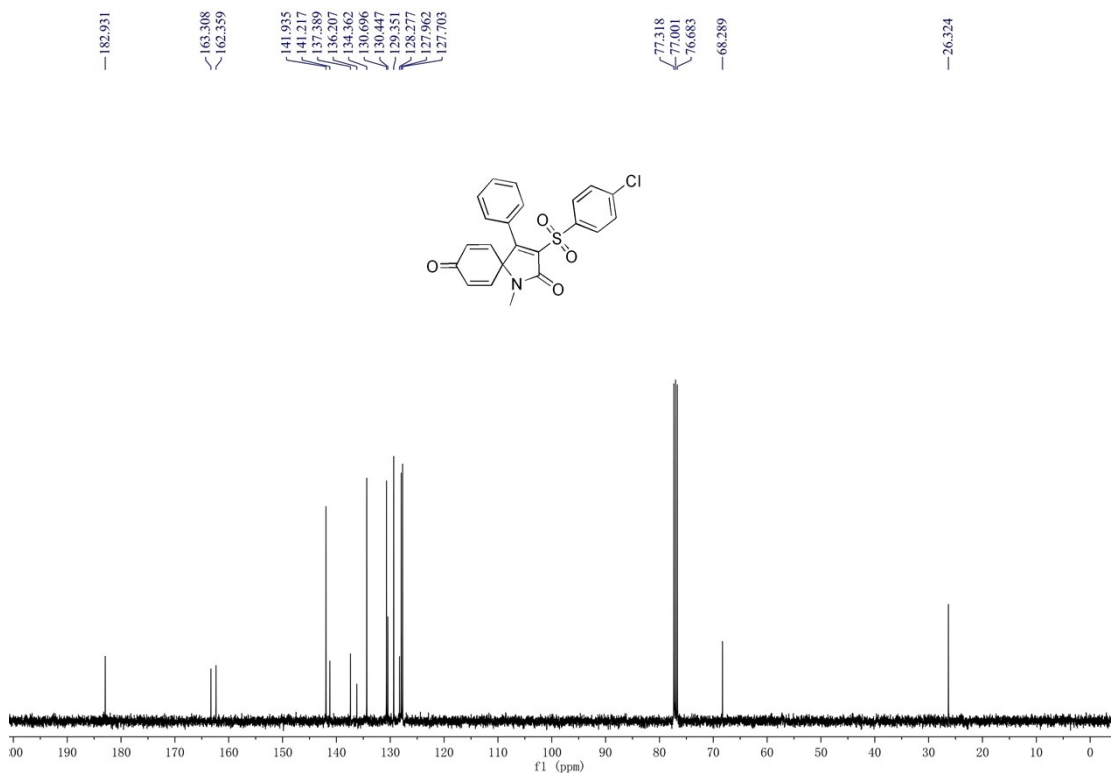

3-((4-Bromophenyl)sulfonyl)-1-methyl-4-phenyl-1-azaspiro[4.5]deca-3,6,9-triene-2,8-dione (3ai)

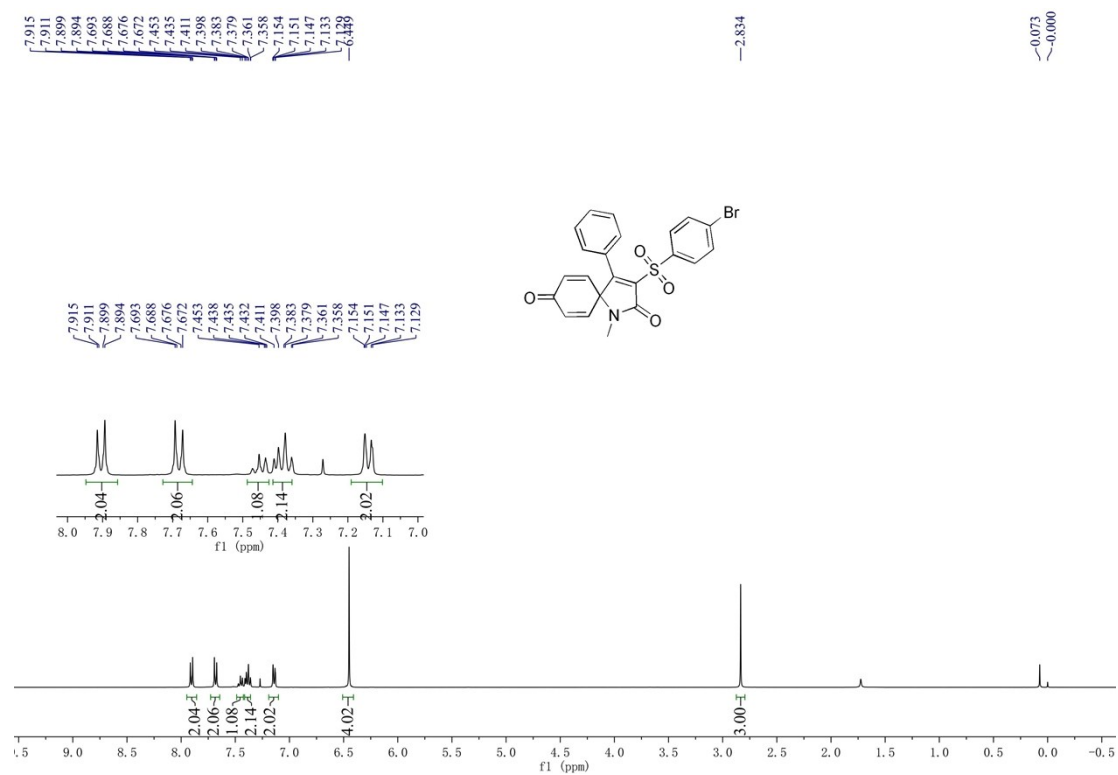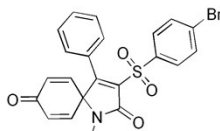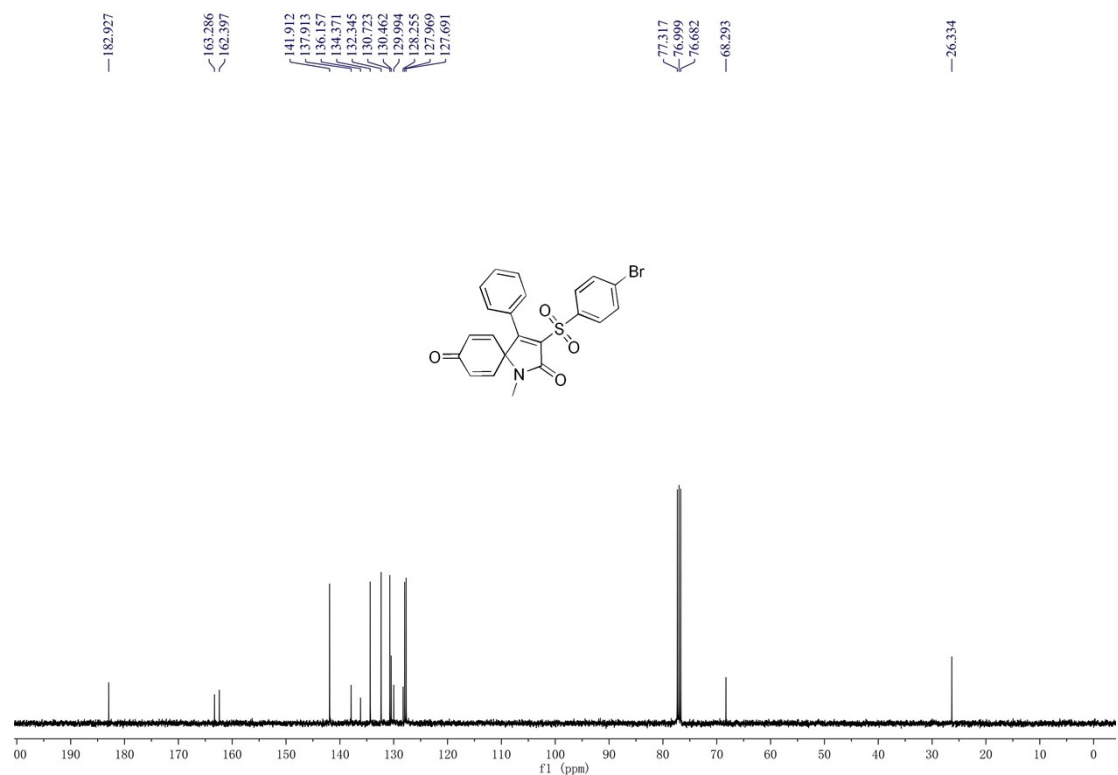

**Ethyl 4-((1-methyl-2,8-dioxo-4-phenyl-1-azaspiro[4.5]deca-3,6,9-trien-3-yl)sulfonyl)benzoate (3aj)**

8.212, 8.190, 8.123, 8.102, 7.465, 7.411, 7.392, 7.274, 7.172, 7.154, 7.138, 6.470, 6.451, 6.430, 6.423, 4.447, 4.429, 4.411, 4.393, -2.827, 1.429, 1.411, 1.393, -0.074, -0.000

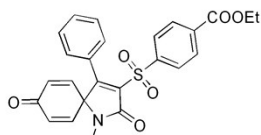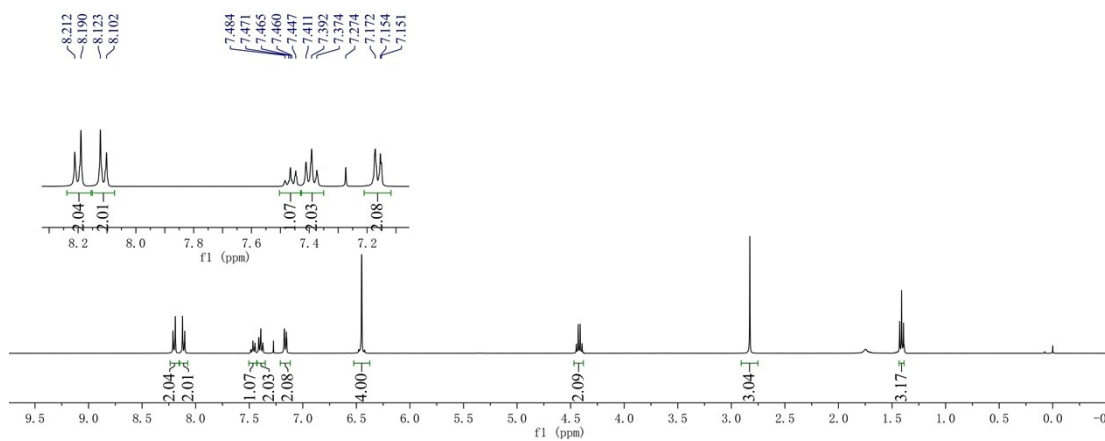

182.926, 164.929, 163.209, 162.944, 142.635, 141.894, 136.053, 135.563, 134.399, 130.550, 130.074, 129.185, 128.226, 128.003, 127.721, 77.318, 77.000, 76.682, -68.314, -61.754, -26.318, -14.199

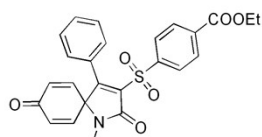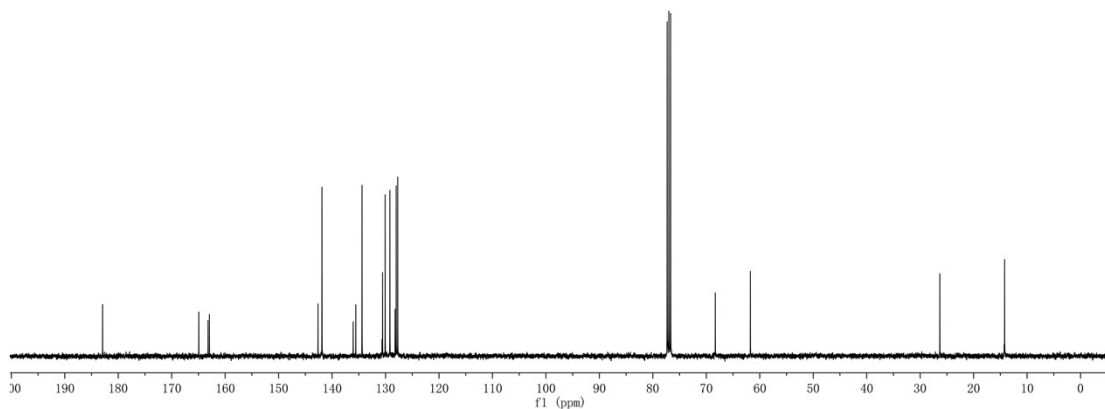

1-Methyl-4-phenyl-3-(m-tolylsulfonyl)-1-azaspiro[4.5]deca-3,6,9-triene-2,8-dione (3ak)

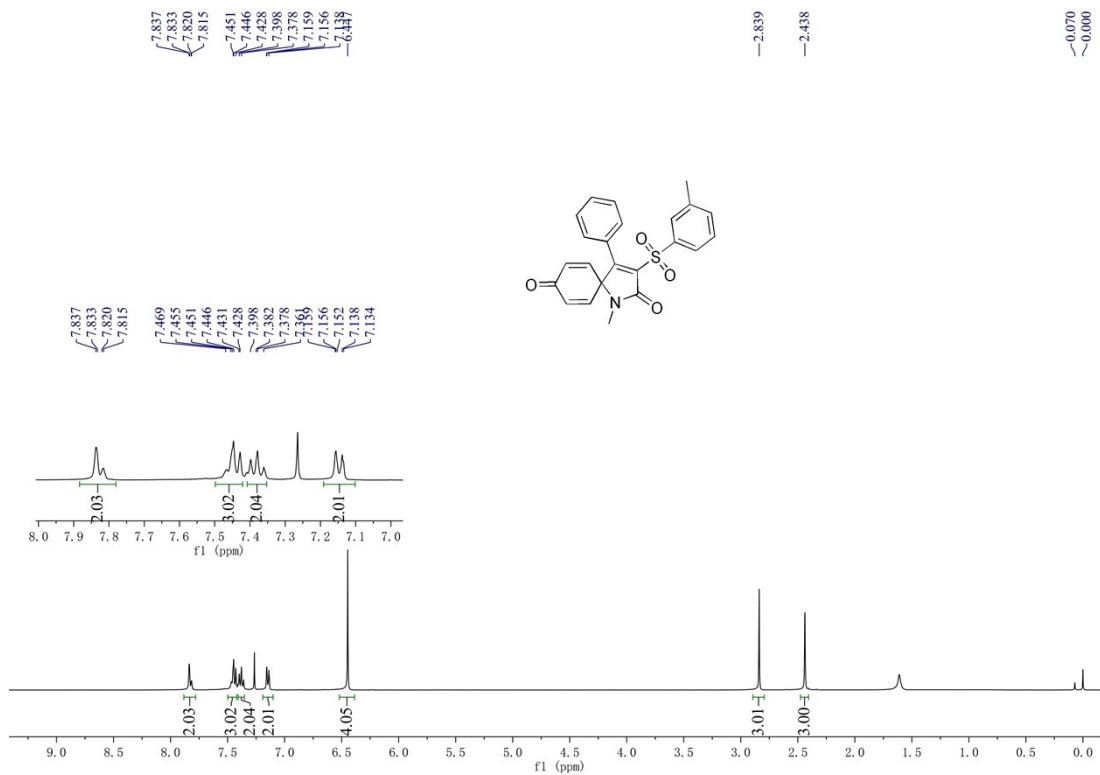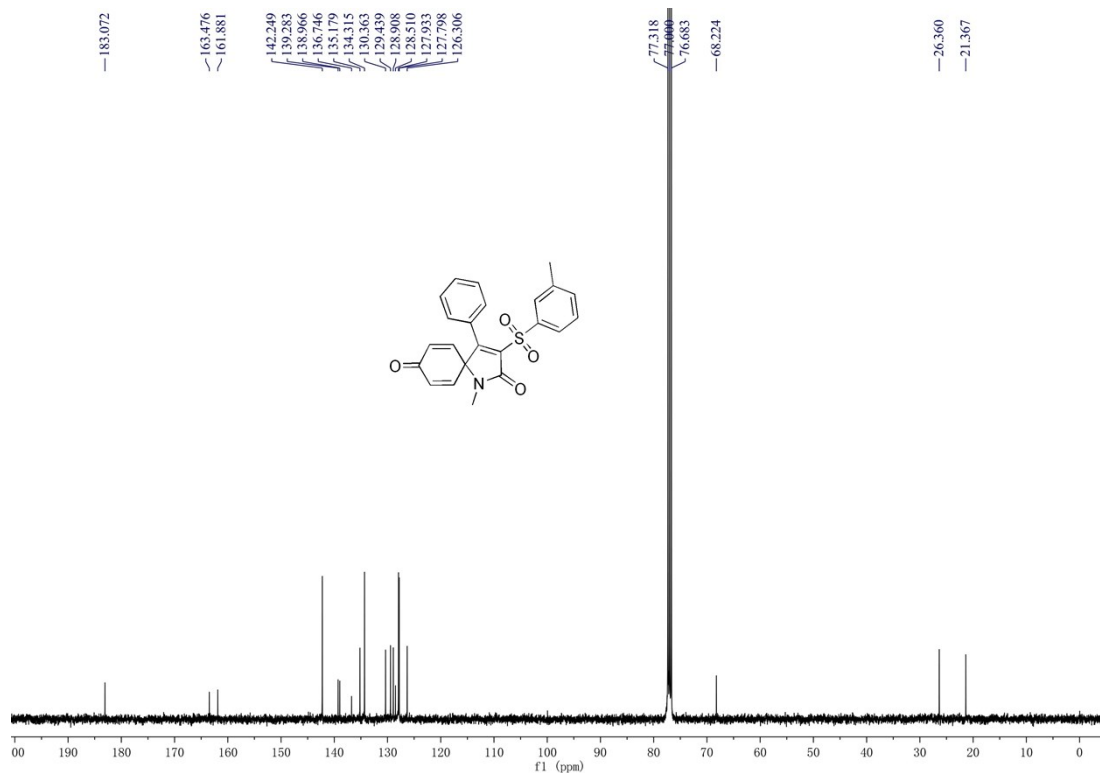

**3-(3-Chlorophenyl)sulfonyl)-1-methyl-4-phenyl-1-azaspiro[4.5]deca-3,6,9-triene-2,8-dione (3a)**

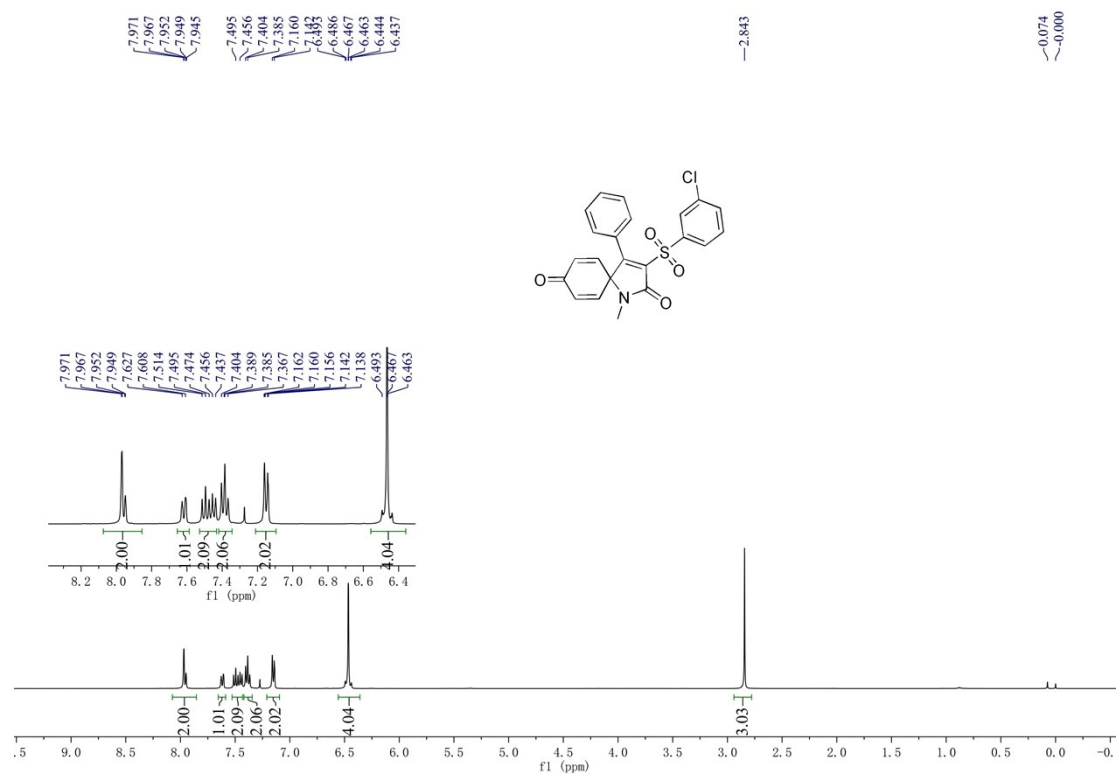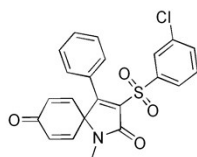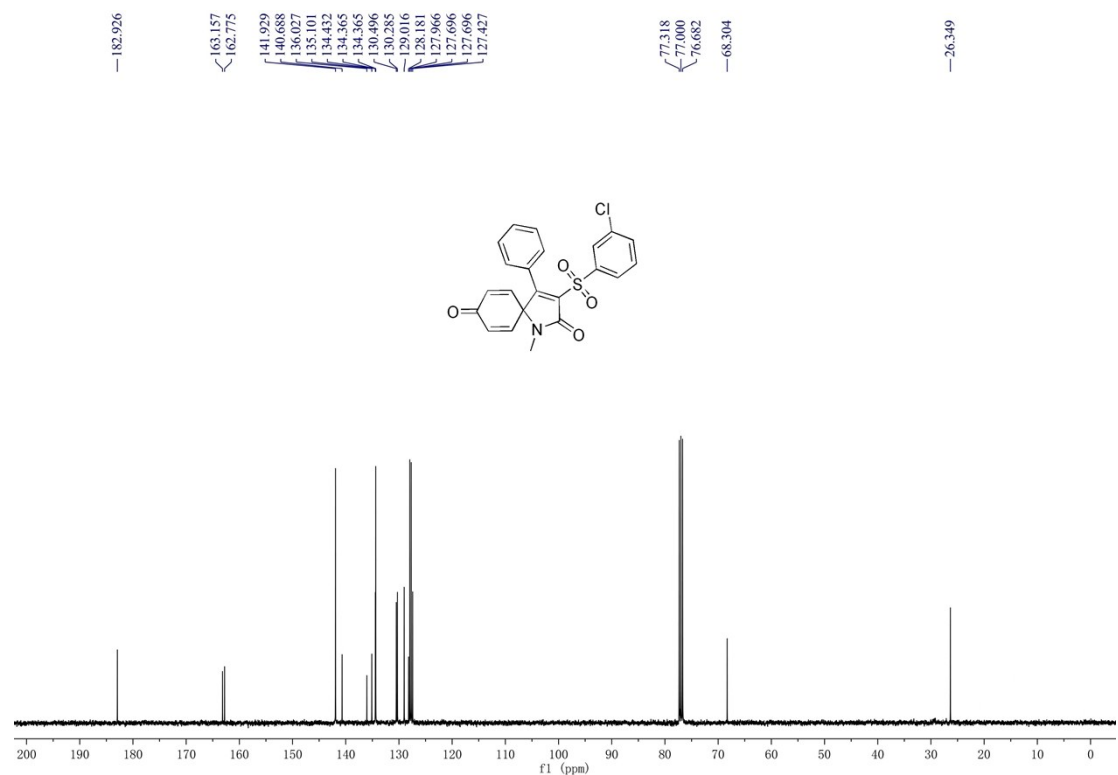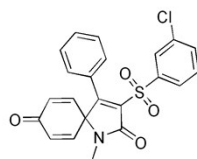



3-((2-Methoxyphenyl)sulfonyl)-1-methyl-4-phenyl-1-azaspiro[4.5]deca-3,6,9-triene-2,8-dione (3am)

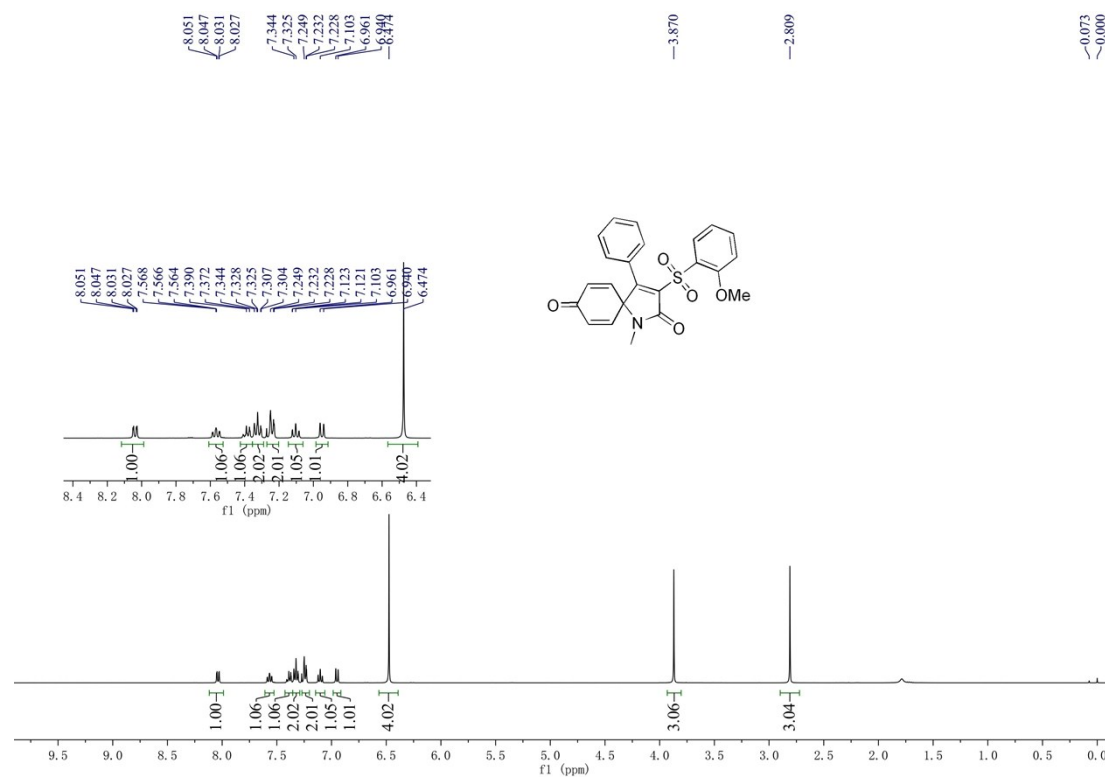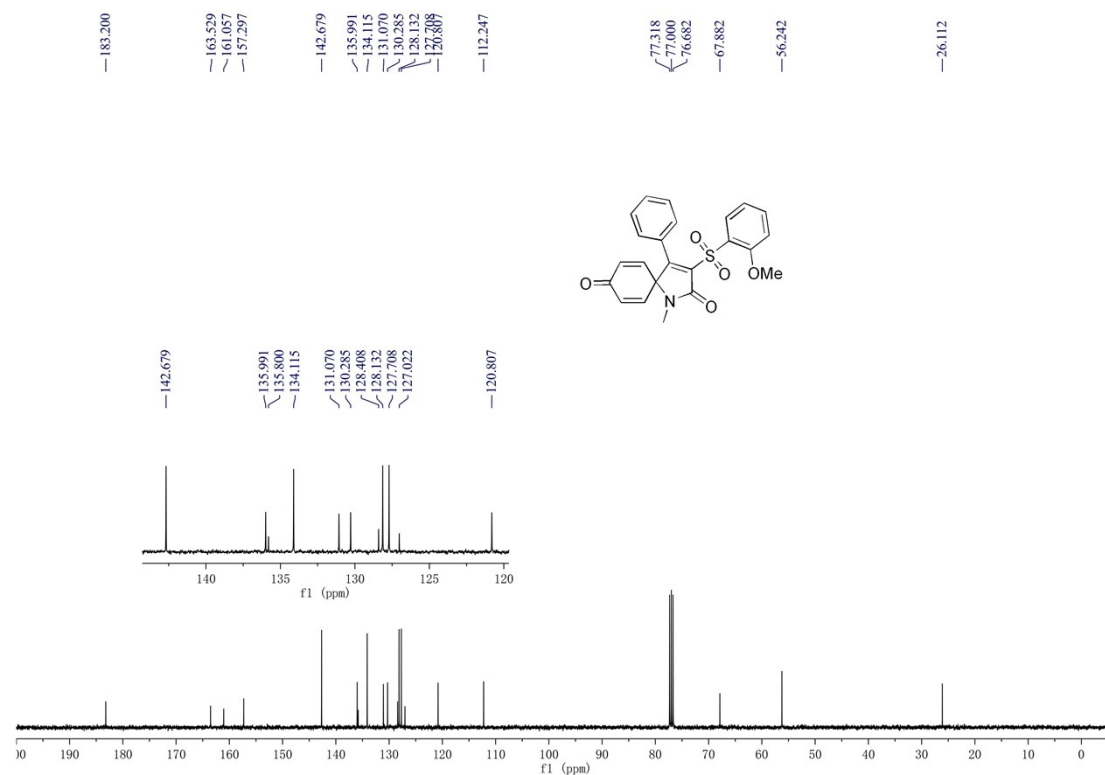

**1-Methyl-4-phenyl-3-(*o*-tolylsulfonyl)-1-azaspiro[4.5]deca-3,6,9-triene-2,8-dione (3an)**

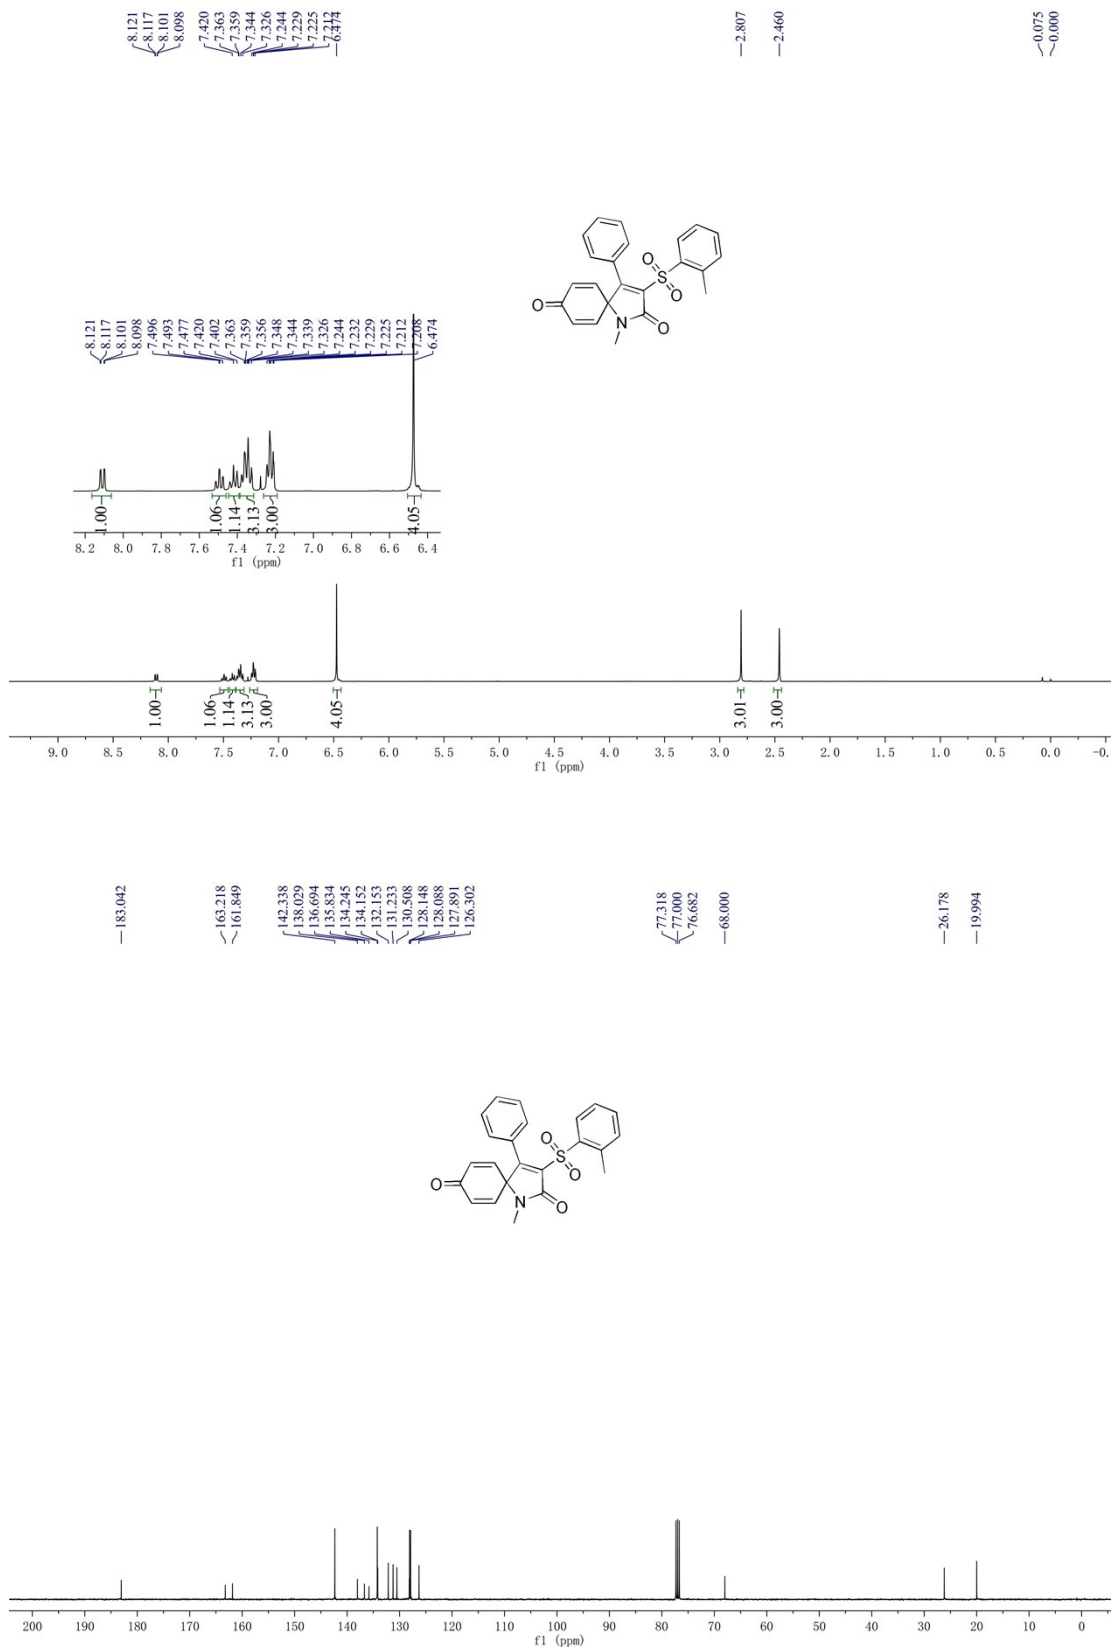

3-((3,5-Dimethylphenyl)sulfonyl)-1-methyl-4-phenyl-1-azaspiro[4.5]deca-3,6,9-triene-2,8-dione (3a)

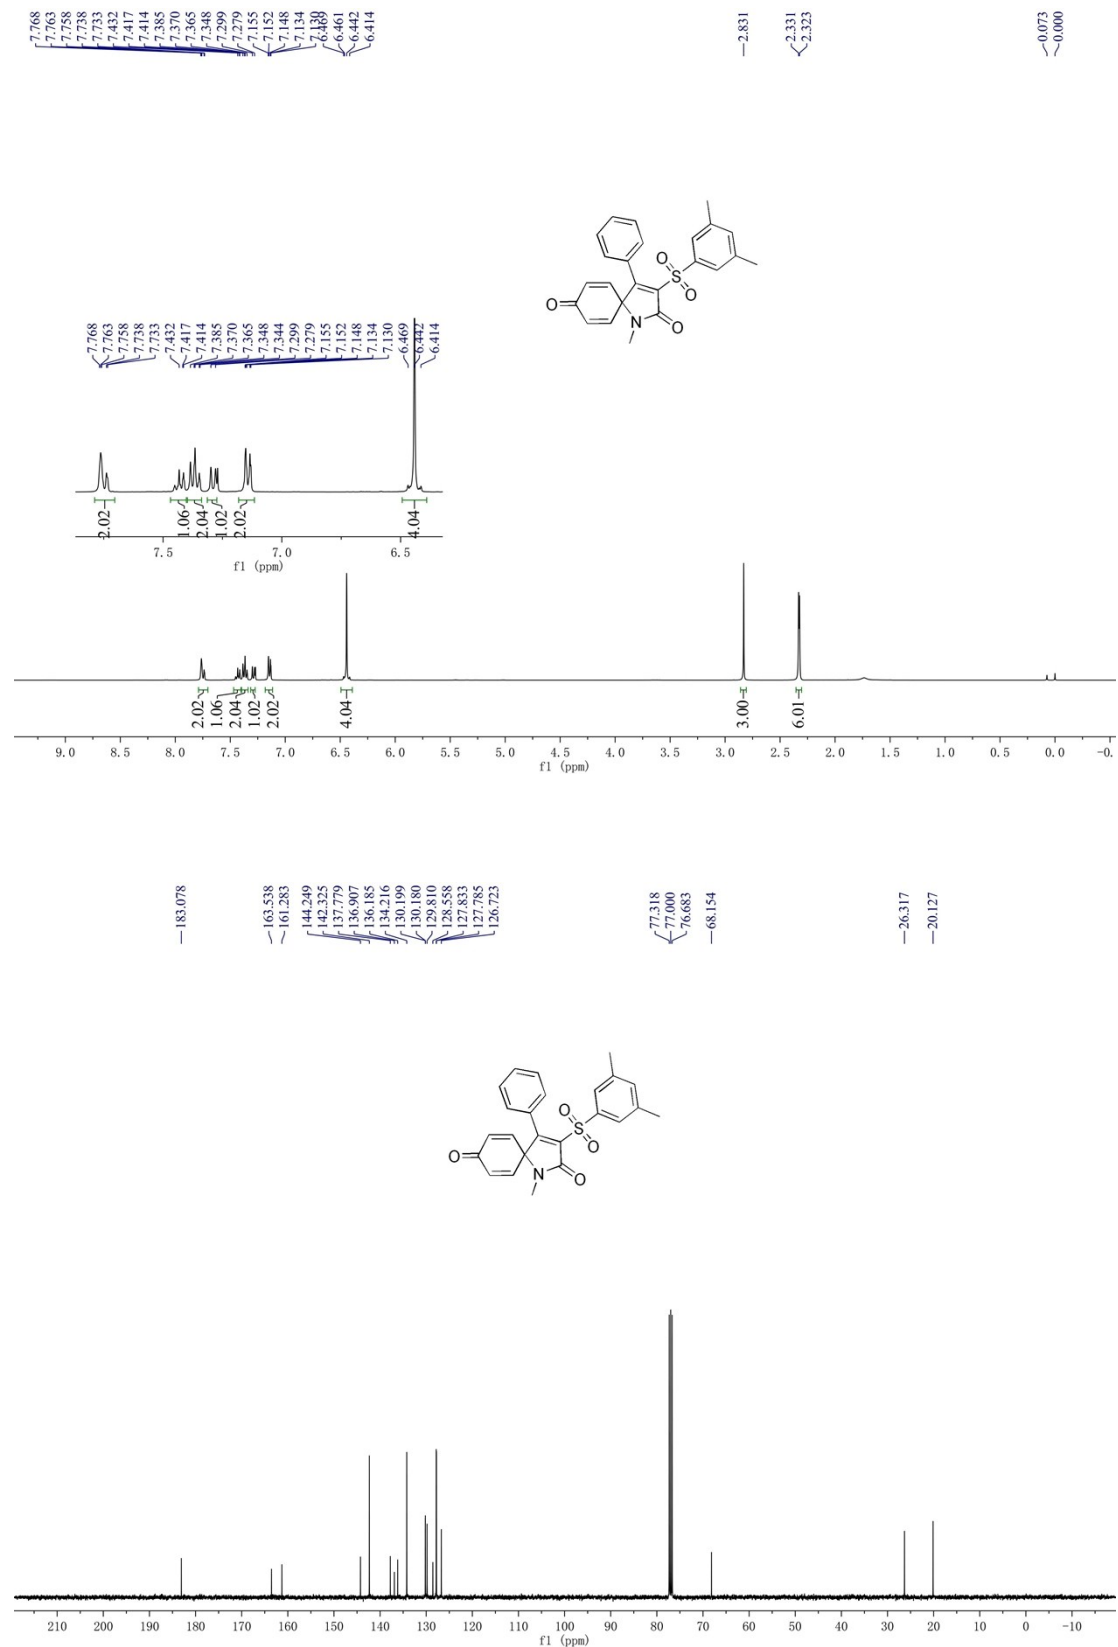

3-((4-Methoxyphenyl)sulfonyl)-1,6-dimethyl-4-phenyl-1-azaspiro[4.5]deca-3,6,9-triene-2,8-dione (3ap)

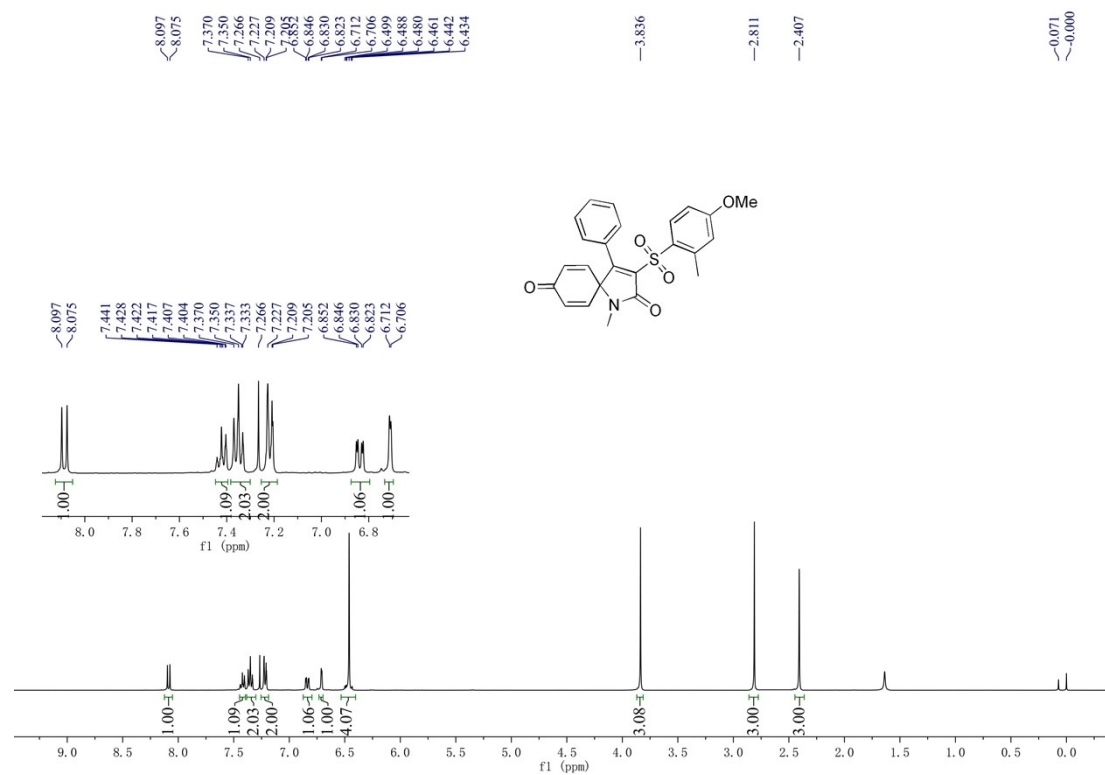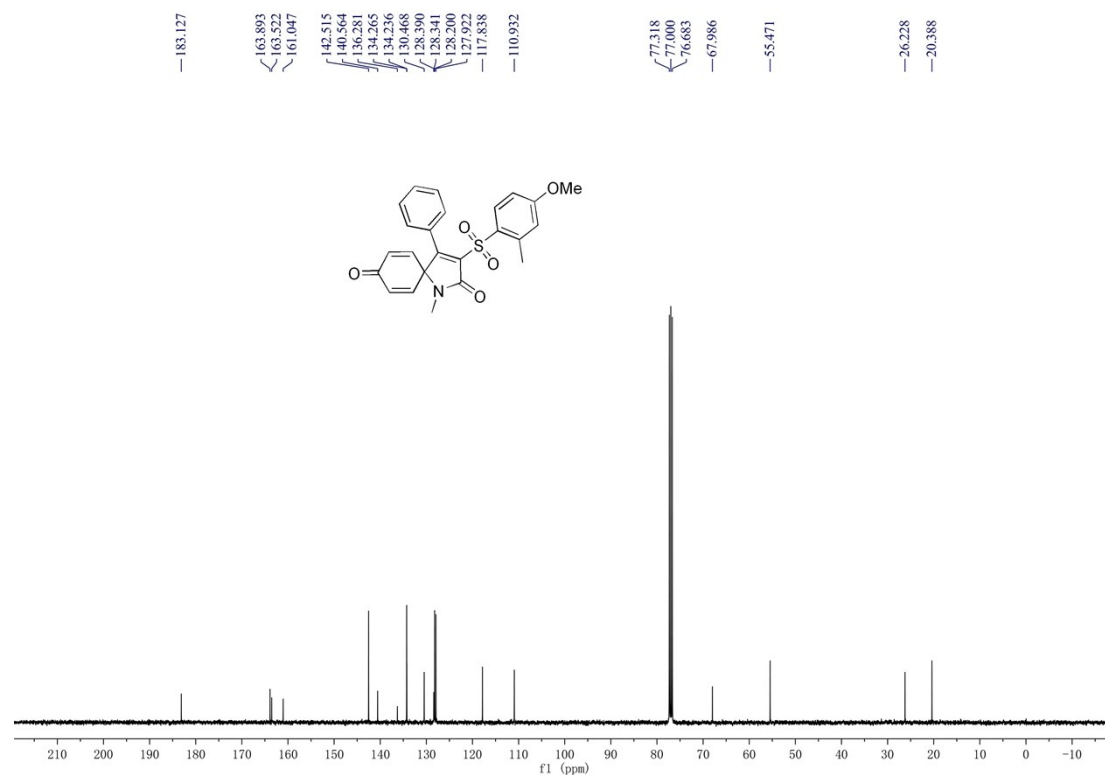

3-((3,4-Dichlorophenyl)sulfonyl)-1-methyl-4-phenyl-1-azaspiro[4.5]deca-3,6,9-triene-2,8-dione (3a)

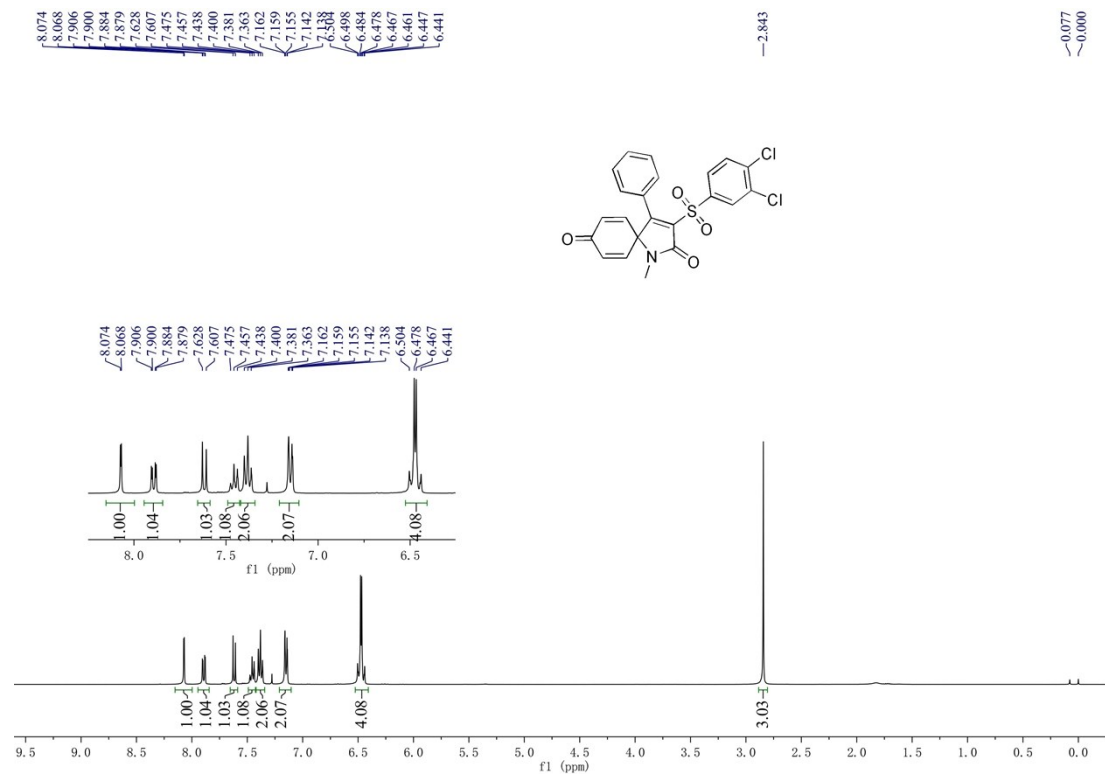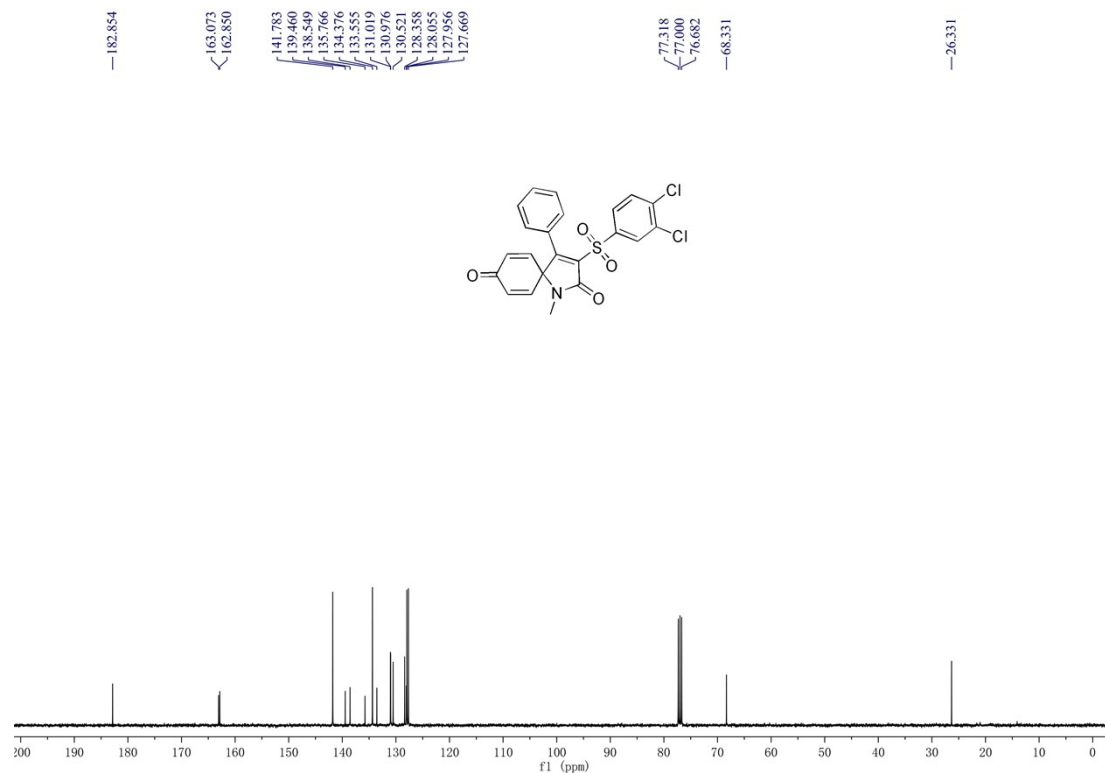

**1-Methyl-3-(naphthalen-1-ylsulfonyl)-4-phenyl-1-azaspiro[4.5]deca-3,6,9-triene-2,8-dione (3ar)**

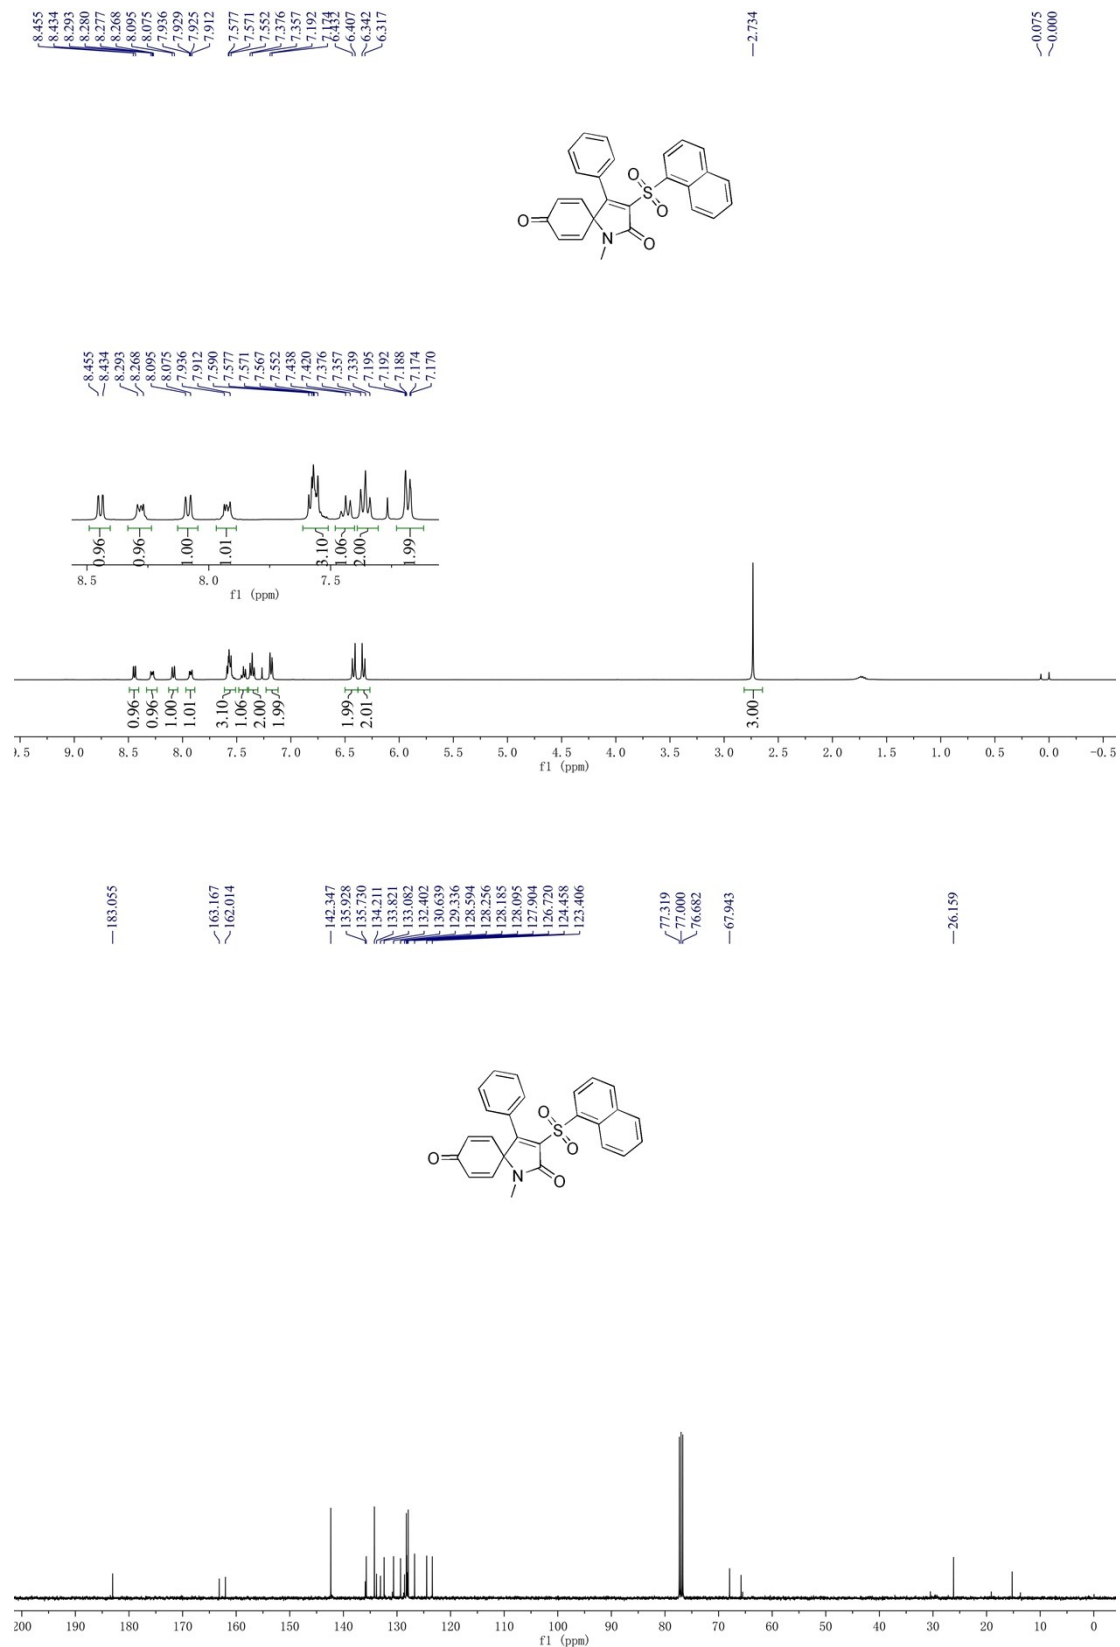

**1-Methyl-3-(naphthalen-2-ylsulfonyl)-4-phenyl-1-azaspiro[4.5]deca-3,6,9-triene-2,8-dione (3as)**

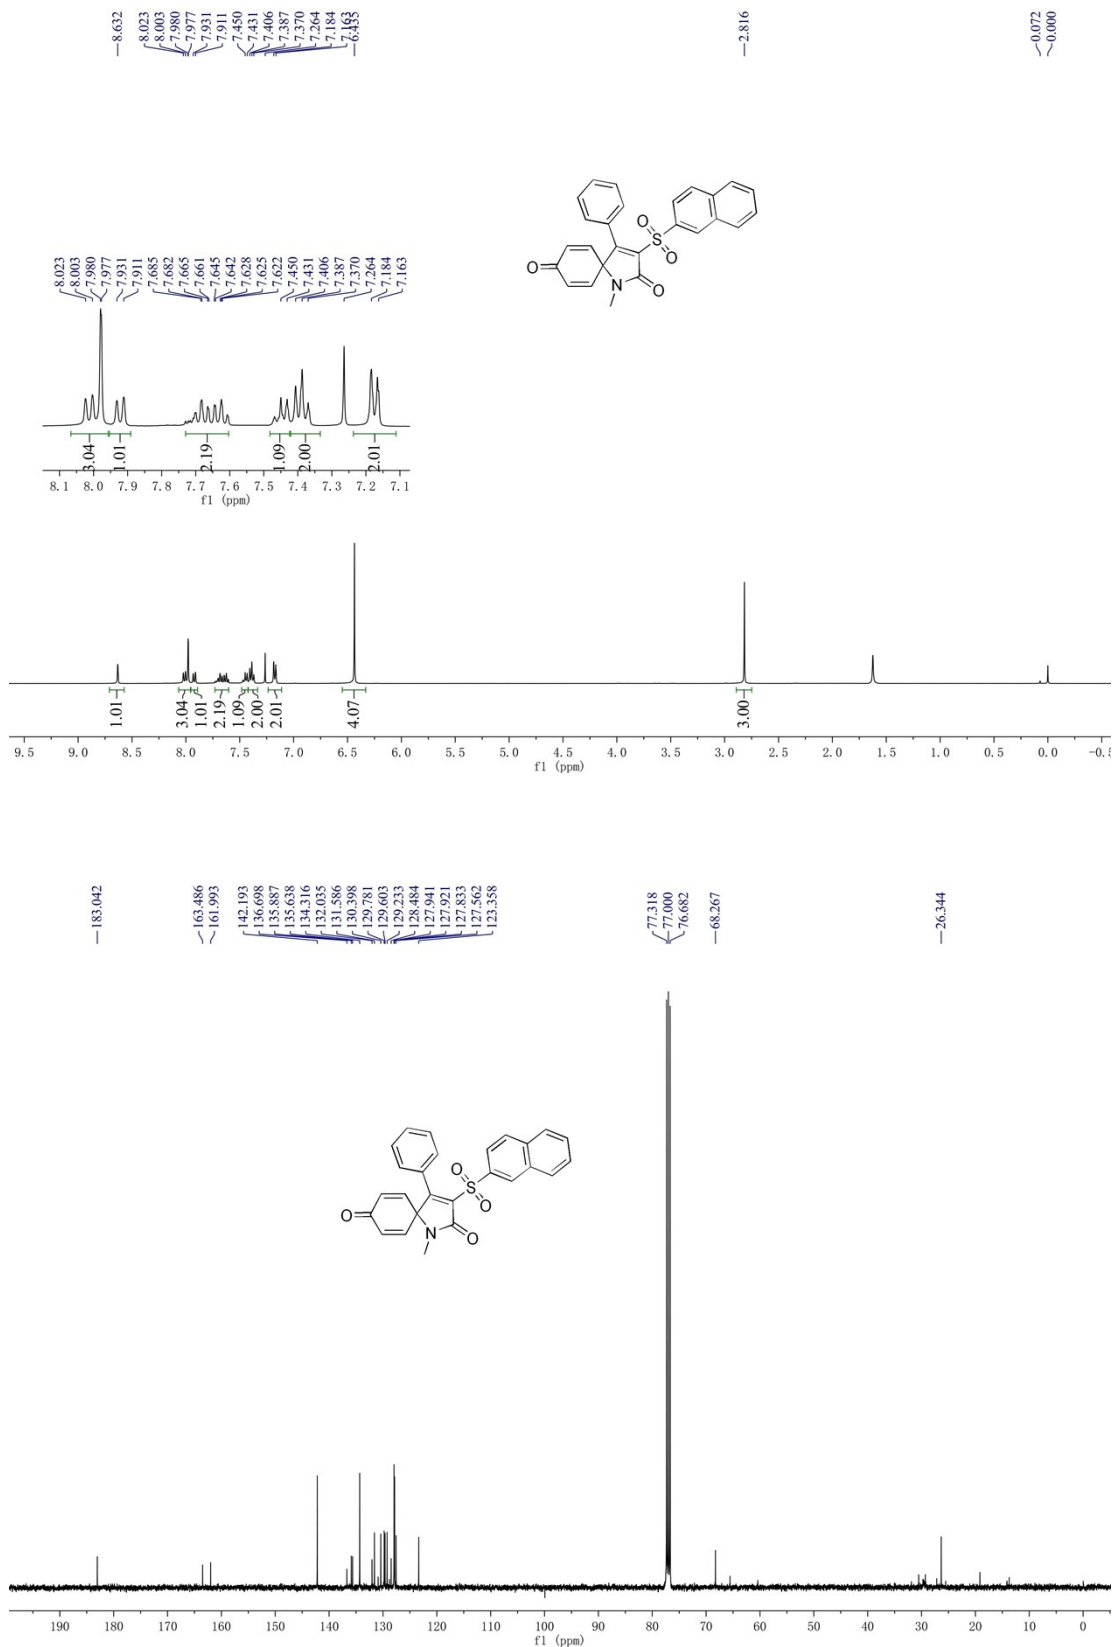

(2-((4-Methoxyphenyl)sulfonyl)ethene-1,1-diyl)dibenzene (4)

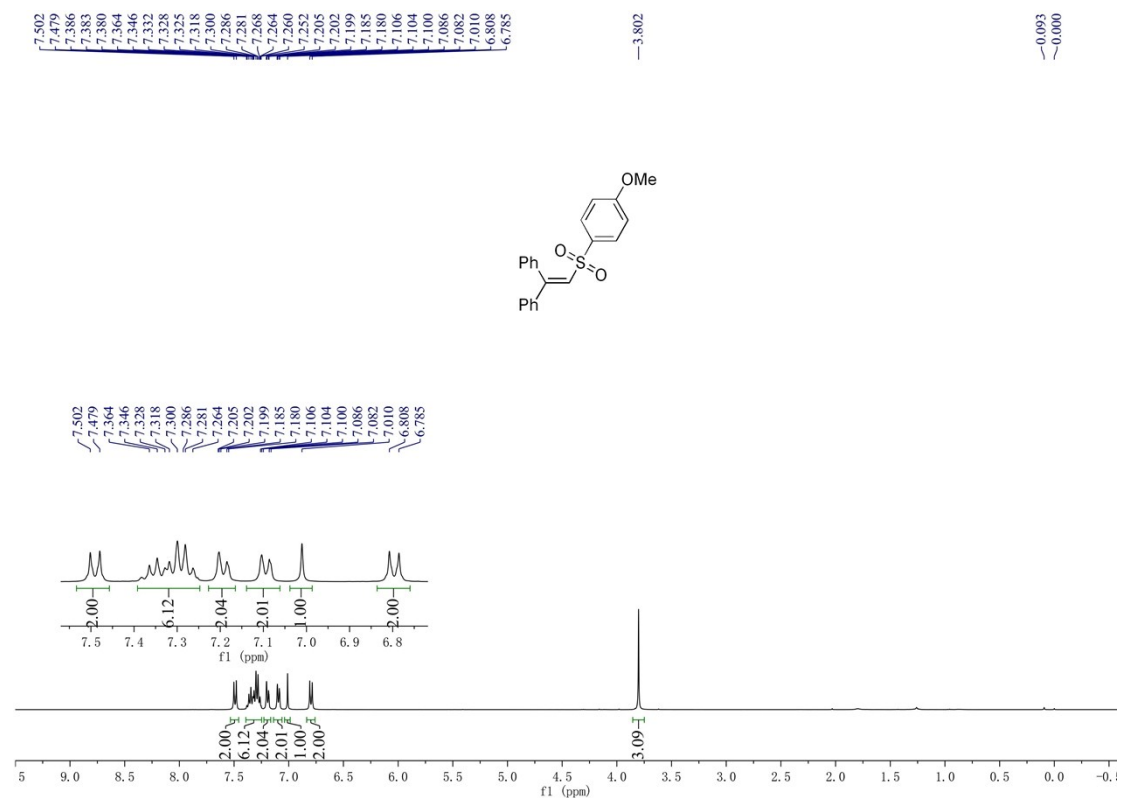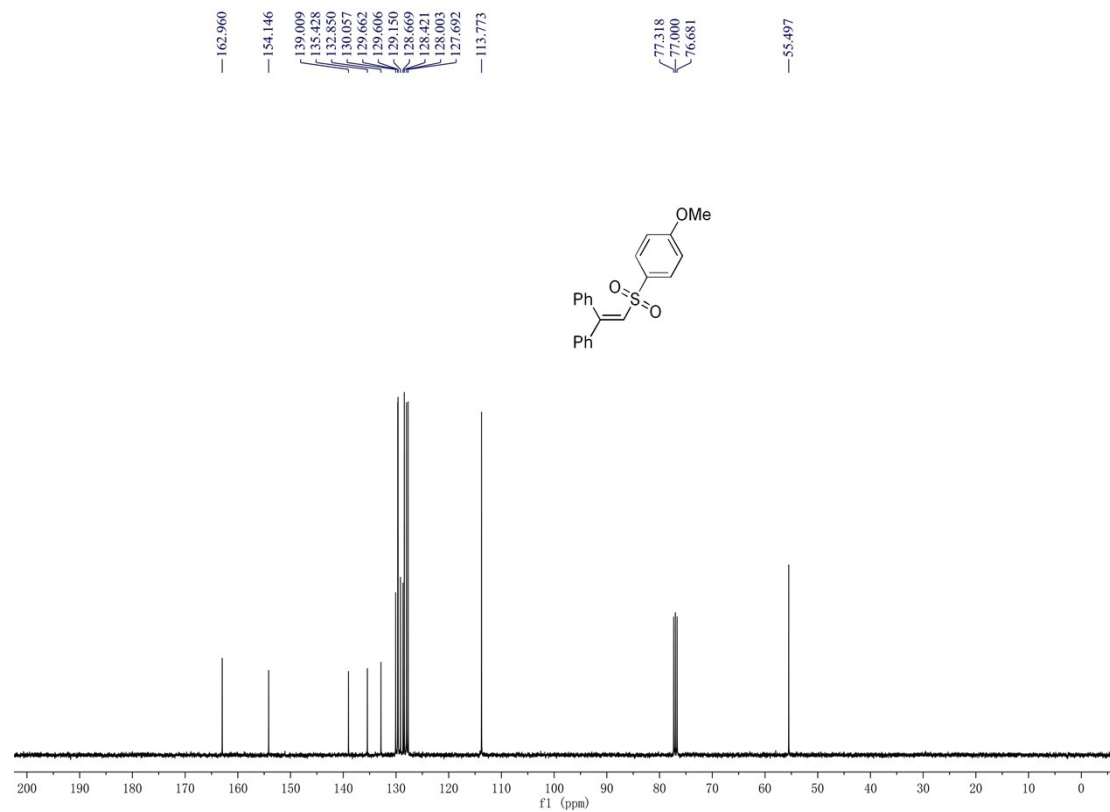



7-methoxy-3-((4-methoxyphenyl)sulfonyl)-4-phenyl-2H-chromen-2-one (6)

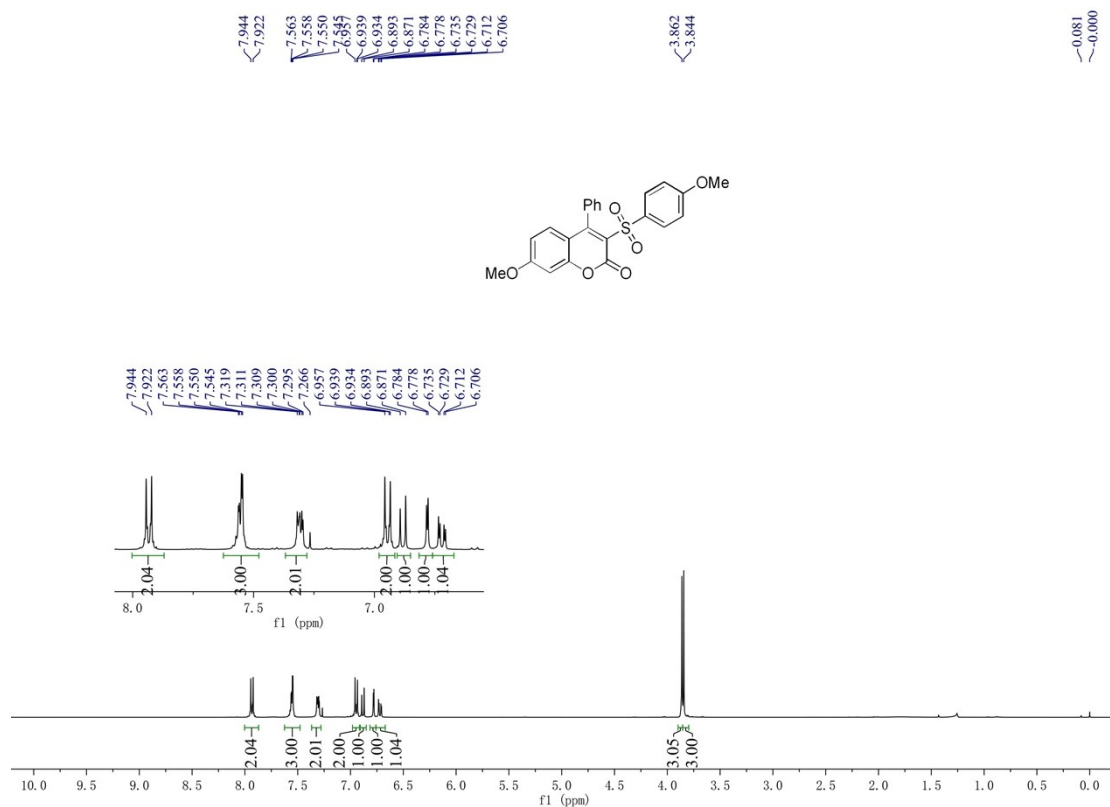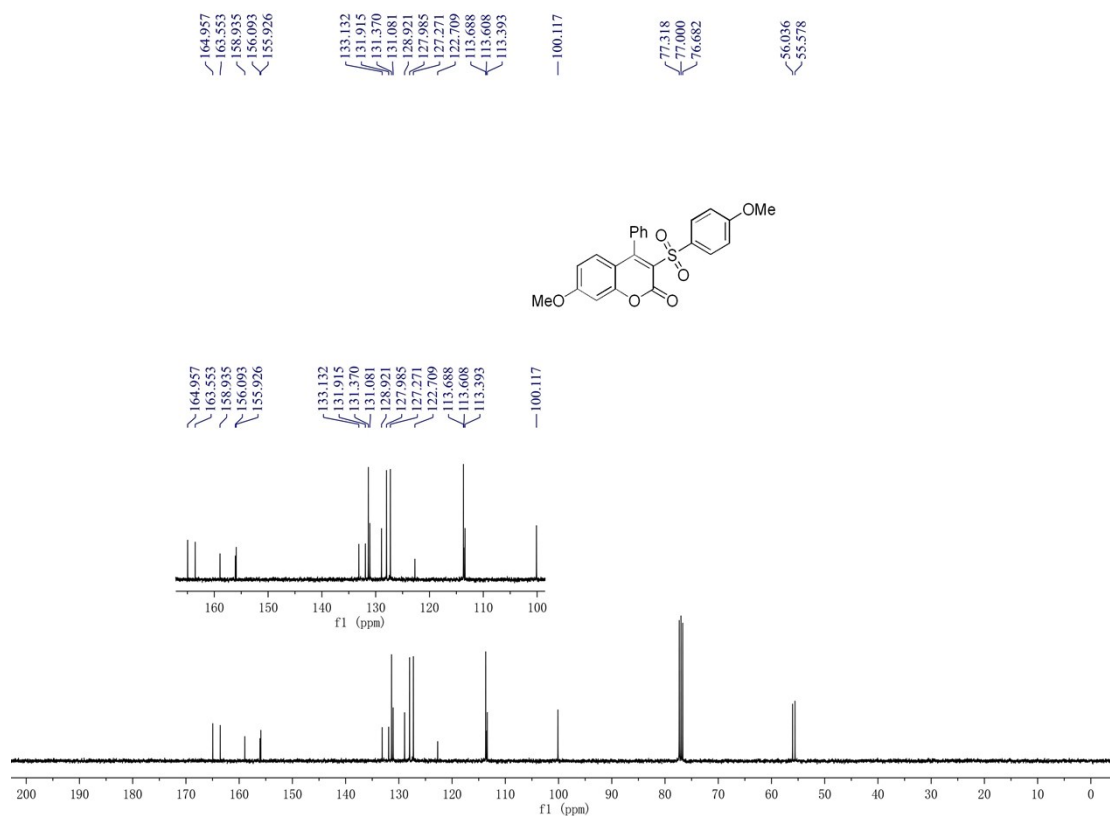

Supplement: c9cc05949k1.pdf [file c9cc05949k1.pdf]
